# Supplementary material for: Synthesis and immunomodulatory activity of the sulfated tetrasaccharide motif of type B ulvanobiuronic acid 3-sulfate
Source: Royal Society of Chemistry journal article supplement (doi:10.1039/d0ob01852j), 2020-01-01

## Supporting Information

# Synthesis and Immunomodulatory Activity of the Sulfated Tetrasaccharide Motif of Type B Ulvanobiuronic Acid 3-Sulfate

Liangliang Zhang, Xiaotong Wang, Qingting Hua, Junchang Wang, Jianwen Liu\*, and You Yang\*

Shanghai Key Laboratory of New Drug Design, School of Pharmacy, East China University of Science and Technology, 130 Meilong Road, Shanghai 200237, China.  
E-mail: liujian@ecust.edu.cn (J. Liu); yangyou@ecust.edu.cn (Y. Yang).

## Contents

|                                                                    | page |
|--------------------------------------------------------------------|------|
| 1. General information                                             | S2   |
| 2. Experimental details and characterization data of new compounds | S2   |
| 3. Materials and method biology                                    | S19  |
| 4. References                                                      | S21  |
| 5. NMR Spectra of new compounds                                    | S22  |

**1. General Information.** All reactions were performed with anhydrous solvents in oven-dried glassware with magnetic stirring under argon or nitrogen unless otherwise stated. The chemicals were used as supplied except where noted. Analytical thin layer chromatography (TLC) was conducted on precoated plates of silica gel (0.25-0.3 mm, Shanghai, China). The TLC plates were visualized by exposure to UV light or by staining with a sulfuric acid-ethanol solution. Silica gel column chromatography was performed on silica gel AR (100-200 mesh, Shanghai, China). Optical rotations (OR) were measured with a Rudolph Research Analytical Autopol I automatic polarimeter. NMR spectra were recorded with a Bruker Avance III 400, Bruker Avance III 500, or Bruker Avance III 600 spectrometer. The  $^1\text{H}$  and  $^{13}\text{C}$  NMR spectra were calibrated against the residual proton and carbon signals of the solvents as internal references ( $\text{CDCl}_3$ :  $\delta_{\text{H}} = 7.26$  ppm and  $\delta_{\text{C}} = 77.2$  ppm;  $\text{CD}_3\text{OD}$ :  $\delta_{\text{H}} = 3.31$  ppm and  $\delta_{\text{C}} = 49.0$  ppm;  $\text{D}_2\text{O}$ :  $\delta_{\text{H}} = 4.79$  ppm). Multiplicities are quoted as singlet (s), broad singlet (br s), doublet (d), triplet (t), quartet (q), doublet of doublets (dd), doublet of doublet of doublets (ddd), doublet of triplets (dt), triplet of doublets (td) or multiplet (m). All NMR chemical shifts ( $\delta$ ) were recorded in ppm and coupling constants ( $J$ ) were reported in Hz. High-resolution mass spectra were recorded on ESI-TOF spectrometer.

## 2. Experimental details and characterization data of new compounds

### 2.1. Synthesis of 2-methyl-5-*tert*-butylphenyl 2,3-*O*-isopropylidene-1-thio- $\alpha$ -L-rhamnopyranoside **3**

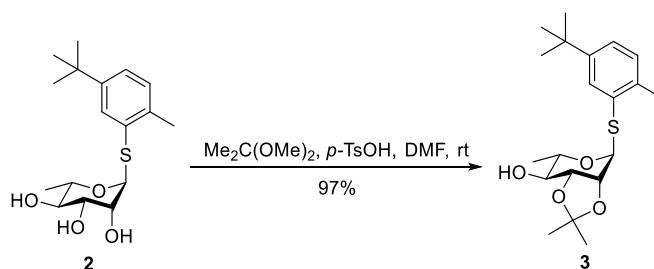

To a solution of thioglycoside **2**<sup>1</sup> (4.3 g, 13.2 mmol) in DMF (43 mL) was added 2,2-dimethoxypropane (3.9 mL, 31.8 mmol) and *p*-toluenesulfonic acid monohydrate (609 mg, 3.2 mmol) at room temperature. After being stirred overnight, the reaction mixture was neutralized with triethylamine. The solution was diluted with  $\text{CH}_2\text{Cl}_2$  and washed with brine. The organic layer was dried over  $\text{Na}_2\text{SO}_4$ , filtered and concentrated under reduced pressure. The residue was purified by silica gel column chromatography (petroleum ether/EtOAc: 6/1 $\rightarrow$ 3/1) to give **3** (4.7 g, 97%) as a

colorless syrup.  $[\alpha]_D^{25} = -175.7$  ( $c$  0.39,  $\text{CHCl}_3$ );  $^1\text{H}$  NMR (400 MHz,  $\text{CDCl}_3$ )  $\delta$  7.59 (d,  $J = 2.0$  Hz, 1 H), 7.22 (dd,  $J = 2.0, 8.0$  Hz, 1 H), 7.14 (d,  $J = 8.0$  Hz, 1 H), 5.74 (s, 1 H), 4.40 (d,  $J = 5.6$  Hz, 1 H), 4.17–4.07 (m, 2 H), 3.50–3.45 (m, 1 H), 2.48 (d,  $J = 3.6$  Hz, 1 H), 2.40 (s, 3 H), 1.55 (s, 3 H), 1.39 (s, 3 H), 1.30 (s, 9 H), 1.24 (d,  $J = 6.4$  Hz, 3 H);  $^{13}\text{C}$  NMR (100 MHz,  $\text{CDCl}_3$ )  $\delta$  149.8, 136.7, 132.2, 130.2, 129.8, 125.0, 109.9, 83.0, 78.6, 77.1, 75.5, 67.1, 34.6, 31.5, 28.4, 26.6, 20.3, 17.3; HRMS (ESI)  $m/z$  calcd for  $\text{C}_{20}\text{H}_{30}\text{O}_4\text{SNa}$   $[\text{M} + \text{Na}]^+$  389.1762, found 389.1760.

## 2.2. Synthesis of 2-methyl-5-*tert*-butylphenyl 2,3-*O*-isopropylidene-4-*O*-levulinoyl-1-thio- $\alpha$ -L-rhamnopyranoside **4**

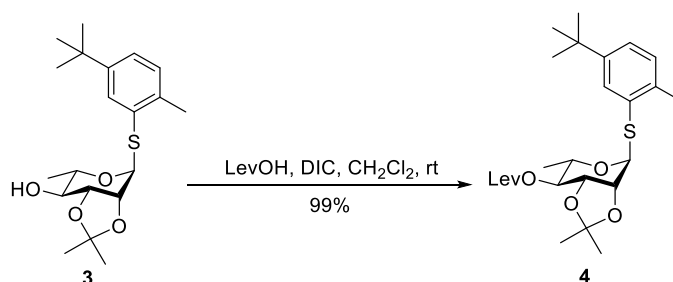

To a solution of compound **3** (4.7 g, 12.8 mmol) in anhydrous  $\text{CH}_2\text{Cl}_2$  (40.0 mL) was added DMAP (1.7 g, 20.3 mmol), LevOH (2.1 mL, 20.3 mmol) and DIC (3.1 mL, 20.3 mmol) at 0 °C. After being stirred at room temperature for 1 h, the reaction mixture was neutralized with saturated aqueous  $\text{NaHCO}_3$ . The organic layer was dried over  $\text{Na}_2\text{SO}_4$ , filtered and concentrated under reduced pressure. The residue was purified by silica gel column chromatography (petroleum ether/EtOAc: 9:1→6:1) to give **4** (5.9 g, 99%) as a colorless syrup.  $[\alpha]_D^{25} = -135.2$  ( $c$  0.35,  $\text{CHCl}_3$ );  $^1\text{H}$  NMR (600 MHz,  $\text{CDCl}_3$ )  $\delta$  5.57 (d,  $J = 1.8$  Hz, 1 H), 7.22 (dd,  $J = 1.8, 7.8$  Hz, 1 H), 7.15 (d,  $J = 7.8$  Hz, 1 H), 5.74 (s, 1H), 4.94 (dd,  $J = 7.8, 9.6$  Hz, 1 H), 4.40 (d,  $J = 5.4$  Hz, 1 H), 4.26 (dd,  $J = 4.8, 7.8$  Hz, 1 H), 4.24–4.19 (m, 1 H), 2.91–2.85 (m, 1 H), 2.73–2.66 (m, 2 H), 2.61–2.56 (m, 1 H), 2.40 (s, 3 H), 2.19 (s, 3 H), 1.57 (s, 3 H), 1.37 (s, 3 H), 1.30 (s, 9 H), 1.14 (d,  $J = 6.6$  Hz, 3 H);  $^{13}\text{C}$  NMR (150 MHz,  $\text{CDCl}_3$ )  $\delta$  206.6, 172.2, 149.9, 136.7, 132.0, 130.2, 129.9, 125.2, 110.2, 83.1, 77.0, 75.7, 75.2, 65.9, 38.1, 34.7, 31.5, 30.0, 28.2, 27.9, 26.8, 20.3, 17.0; HRMS (ESI)  $m/z$  calcd for  $\text{C}_{25}\text{H}_{36}\text{O}_6\text{SNa}$   $[\text{M} + \text{Na}]^+$  487.2130, found 487.2131.

## 2.3. Synthesis of 2-methyl-5-*tert*-butylphenyl 4-*O*-levulinoyl-1-thio- $\alpha$ -L-rhamnopyranoside **5**

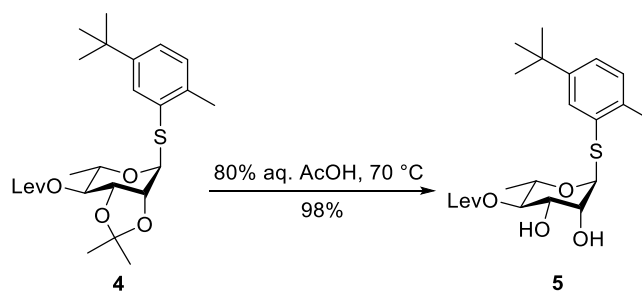

To a solution of 80% aqueous acetic acid solution (69 mL) was added compound **4** (5.9 g, 12.7 mmol) at room temperature. After being stirred at 70 °C overnight, the reaction mixture was neutralized with saturated aqueous NaHCO<sub>3</sub>. The solution was diluted with CH<sub>2</sub>Cl<sub>2</sub> and washed with brine. The organic layer was dried over Na<sub>2</sub>SO<sub>4</sub>, filtered and concentrated under reduced pressure. The residue was purified by silica gel column chromatography (CH<sub>2</sub>Cl<sub>2</sub>/MeOH: 50:1→40:1) to give **5** (5.3 g, 98%) as a white solid.  $[\alpha]_D^{25} = -203.8$  (*c* 0.44, CHCl<sub>3</sub>); <sup>1</sup>H NMR (600 MHz, CDCl<sub>3</sub>) δ 7.58 (d, *J* = 1.8 Hz, 1 H), 7.21 (dd, *J* = 1.8, 7.8 Hz, 1 H), 7.13 (d, *J* = 7.8 Hz, 1 H), 5.48 (d, *J* = 1.2 Hz, 1 H), 4.97 (t, *J* = 9.6 Hz, 1 H), 4.34–4.30 (m, 1 H), 4.27 (dd, *J* = 1.2, 3.0 Hz, 1 H), 4.02 (dd, *J* = 3.6, 9.6 Hz, 1 H), 3.47 (br s, 1 H), 2.95 (br s, 1 H), 2.89–2.80 (m, 2 H), 2.66–2.56 (m, 2 H), 2.38 (s, 3 H), 2.21 (s, 3 H), 1.30 (s, 9 H), 1.23 (d, *J* = 6.6 Hz, 3 H); <sup>13</sup>C NMR (150 MHz, CDCl<sub>3</sub>) δ 207.8, 173.6, 150.0, 136.4, 132.9, 130.1, 129.3, 124.9, 87.0, 75.9, 72.8, 70.8, 67.1, 38.5, 34.7, 31.5, 30.0, 28.4, 20.3, 17.5; HRMS (ESI) *m/z* calcd for C<sub>22</sub>H<sub>32</sub>O<sub>6</sub>SNa [M + Na]<sup>+</sup> 447.1817, found 447.1818.

#### 2.4. Synthesis of 2-methyl-5-*tert*-butylphenyl 3-*O*-(4-methoxybenzyl)-4-*O*-levulinoyl-1-thio- $\alpha$ -L-rhamnopyranoside **6**

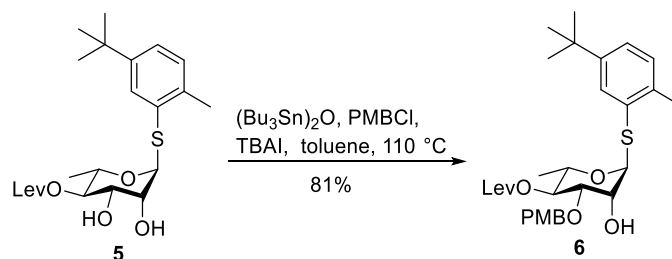

To a solution of diol **5** (482 mg, 1.14 mmol) in anhydrous toluene (22 mL) was added (Bu<sub>3</sub>Sn)<sub>2</sub>O (698  $\mu$ L, 1.37 mmol). The reaction mixture was stirred at 110 °C for 1 h, and then cooled to 60 °C before PMBCl (232  $\mu$ L, 1.71 mmol) and TBAI (632 mg, 1.71 mmol) were added. The mixture was then stirred at 110 °C overnight and concentrated under reduced pressure. The resulting crude product was purified by silica gel column chromatography (petroleum ether/EtOAc: 8/1→4/1) to give **6** (504

mg, 81%) as a slightly yellow syrup.  $[\alpha]_D^{25} = -149.6$  (*c* 0.39, CHCl<sub>3</sub>); <sup>1</sup>H NMR (400 MHz, CDCl<sub>3</sub>)  $\delta$  7.57 (d, *J* = 1.6 Hz, 1 H), 7.28 (d, *J* = 8.8 Hz, 2 H), 7.20 (dd, *J* = 2.0, 8.0 Hz, 1 H), 7.13 (d, *J* = 8.0 Hz, 1 H), 6.91 (d, *J* = 8.4 Hz, 2 H), 5.50 (d, *J* = 1.2 Hz, 1 H), 5.10 (t, *J* = 9.6 Hz, 1 H), 4.62 (d-like, *J* = 11.6 Hz, 1 H), 4.55 (d-like, *J* = 11.6 Hz, 1 H), 4.29–4.22 (m, 2 H), 3.82–3.79 (m, 4 H), 2.77–2.73 (m, 2 H), 2.58–2.50 (m, 2 H), 2.37 (s, 3 H), 2.20 (s, 3 H), 1.29 (s, 9 H), 1.19 (d, *J* = 6.0 Hz, 3 H); <sup>13</sup>C NMR (100 MHz, CDCl<sub>3</sub>) 206.5, 172.2, 159.7, 150.0, 136.3, 132.8, 130.1, 129.8, 129.7, 129.4, 124.9, 114.2, 86.6, 73.1, 71.8, 70.4, 67.7, 55.5, 38.0, 34.7, 31.5, 30.0, 28.2, 20.3, 17.5; HRMS (ESI) *m/z* calcd for C<sub>30</sub>H<sub>40</sub>O<sub>7</sub>SNa [M + Na]<sup>+</sup> 567.2392, found 567.2393.

## 2.5. Synthesis of 2-methyl-5-*tert*-butylphenyl 2-*O*-benzoyl-3-*O*-(4-methoxybenzyl)-4-*O*-levulinoyl-1-thio- $\alpha$ -L-rhamnopyranoside **7**

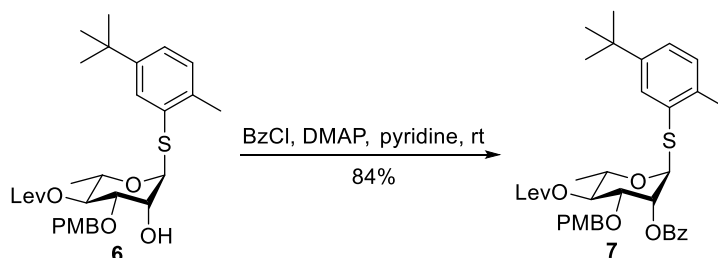

To a solution of **6** (1.0 g, 1.84 mmol) in anhydrous pyridine (3.5 mL) was added DMAP (61 mg, 0.5 mmol) and benzoyl chloride (627  $\mu$ L, 5.4 mmol) at 0 °C. The reaction mixture was allowed to warm to room temperature and stirred at room temperature for 5 h. The solution was diluted with water and extracted with ethyl acetate. The organic layer was washed with 1 M aqueous HCl, saturated aqueous NaHCO<sub>3</sub> and brine. The organic layer was dried over Na<sub>2</sub>SO<sub>4</sub>, filtered and concentrated under reduced pressure. The residue was purified by silica gel column chromatography (petroleum ether/EtOAc: 10/1→8/1) to give **7** (1.0 g, 84%) as a slightly yellow syrup.  $[\alpha]_D^{25} = -12.6$  (*c* 0.78, CHCl<sub>3</sub>); <sup>1</sup>H NMR (600 MHz, CDCl<sub>3</sub>)  $\delta$  8.07 (d, *J* = 7.2 Hz, 2 H), 7.58–7.55 (m, 2 H), 7.44 (t, *J* = 7.8 Hz, 2 H), 7.25–7.22 (m, 3 H), 7.15 (d, *J* = 7.8 Hz, 1 H), 6.86 (d, *J* = 8.4 Hz, 2 H), 5.81 (dd, *J* = 1.2, 3.0 Hz, 1 H), 5.47 (d, *J* = 1.8 Hz, 1 H), 5.22 (t, *J* = 9.6 Hz, 1 H), 4.64 (d-like, *J* = 12.0 Hz, 1 H), 4.46 (d-like, *J* = 12.0 Hz, 1 H), 4.39–2.59 (m, 2 H), 2.52–2.46 (m, 1 H), 2.43 (s, 3 H), 2.19 (s, 3 H), 1.30 (s, 9 H), 1.28 (d, *J* = 6.0 Hz, 3 H); <sup>13</sup>C NMR (150 MHz, CDCl<sub>3</sub>)  $\delta$  206.6, 172.2, 165.9, 159.5, 150.0, 137.0, 133.5, 132.4, 130.4, 130.3, 130.1, 129.9, 129.8, 129.7, 128.6, 125.5, 113.9, 86.0, 74.6, 73.2, 71.2, 71.0, 68.2, 55.4, 38.0, 34.6,

31.5, 30.0, 28.1, 20.5, 17.7; HRMS (ESI)  $m/z$  calcd for  $C_{37}H_{44}O_8SNa$   $[M + Na]^+$  671.2655, found 671.2654.

## 2.6. Synthesis of 2-methyl-5-*tert*-butylphenyl 2-*O*-benzoyl-3-*O*-(4-methoxybenzyl)-1-thio- $\alpha$ -L-rhamnopyranoside **8**

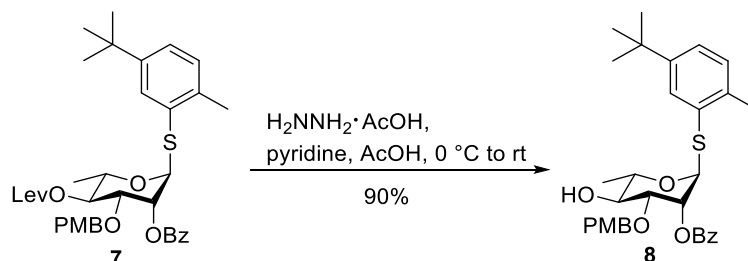

To a solution of compound **7** (1.7 g, 2.62 mmol) in pyridine/acetic acid (3/1, v/v, 22 mL) was added hydrazine acetate (1.2 g, 13.0 mmol) at 0 °C. The reaction mixture was allowed to warm to room temperature and stirred for 4 h. Then acetone was added to quench the reaction. The aqueous phase was extracted with ethyl acetate. The organic layer was washed with 1 M aqueous HCl, saturated aqueous  $NaHCO_3$  and brine. The organic layer was dried over  $Na_2SO_4$ , filtered and concentrated under reduced pressure. The residue was purified by silica gel column chromatography (petroleum ether/EtOAc: 6/1→4/1) to give **8** (1.3 g, 90 %) as a white foam.  $[\alpha]_D^{25} = -15.8$  ( $c$  0.94,  $CHCl_3$ );  $^1H$  NMR (600 MHz,  $CDCl_3$ )  $\delta$  8.08 (dd,  $J = 1.2, 7.8$  Hz, 2 H), 7.60–7.57 (m, 2 H), 7.46 (t,  $J = 7.8$  Hz, 2 H), 7.26–7.23 (m, 3 H), 7.16 (d,  $J = 7.8$  Hz, 1 H), 6.85 (d,  $J = 8.4$  Hz, 2 H), 5.88 (dd,  $J = 1.8, 3.0$  Hz, 1 H), 5.50 (d,  $J = 1.2$  Hz, 1 H), 4.76 (d-like,  $J = 10.8$  Hz, 1 H), 4.46 (d-like,  $J = 10.8$  Hz, 1 H), 4.34–4.29 (m, 1 H), 3.87 (dd,  $J = 3.0, 9.6$  Hz, 1 H), 3.79–3.76 (m, 4 H), 2.45 (s, 3 H), 1.40 (d,  $J = 6.0$  Hz, 3 H), 1.32 (s, 9 H);  $^{13}C$  NMR (150 MHz,  $CDCl_3$ )  $\delta$  165.9, 159.7, 149.9, 137.1, 133.5, 132.6, 130.5, 130.2, 130.1, 130.0, 129.9, 129.6, 128.6, 125.4, 114.2, 86.2, 78.0, 72.3, 71.2, 70.7, 69.6, 55.4, 34.6, 31.5, 20.5, 18.0; HRMS (ESI)  $m/z$  calcd for  $C_{32}H_{38}O_6SNa$   $[M + Na]^+$  573.2287, found 573.2288.

## 2.7. Synthesis of methyl ((*Z*)-ynenoyl 2-*O*-benzoyl-3-*O*-benzyl-4-*O*-*tert*-butyldimethylsilyl- $\alpha$ -L-idopyranoside)uronate **10**

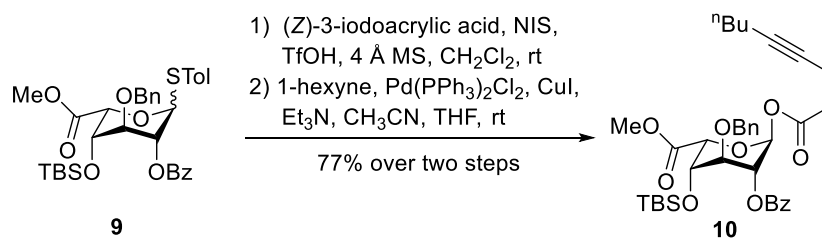

To a solution of thioglycoside **9**<sup>2</sup> (509 mg, 0.82 mmol) in anhydrous CH<sub>2</sub>Cl<sub>2</sub> (20 mL) was added (Z)-3-iodoacrylic acid<sup>3</sup> (243 mg, 1.23 mmol) and 4 Å MS (800 mg). Then NIS (369 mg, 1.64 mmol) and TfOH (10.8 μL, 0.12 mmol) were added. After being stirred at room temperature for 1 h, the reaction mixture was neutralized with Et<sub>3</sub>N and filtered through Celite. The filtrate was diluted with CH<sub>2</sub>Cl<sub>2</sub>, washed with saturated aqueous Na<sub>2</sub>S<sub>2</sub>O<sub>3</sub> and brine, dried over Na<sub>2</sub>SO<sub>4</sub>, filtered, and concentrated under reduced pressure. The residue was purified by silica gel column chromatography (petroleum ether/EtOAc: 15/1→10/1) to give the corresponding glycosyl (Z)-3-iodoacrylate (515 mg, 90%) as an orange syrup. To a solution of the above glycosyl (Z)-3-iodoacrylate (515 mg, 0.74 mmol) in anhydrous CH<sub>3</sub>CN/THF (2/1, v/v, 51 mL) was added Pd(PPh<sub>3</sub>)<sub>2</sub>Cl<sub>2</sub> (28 mg, 0.06 mmol) and CuI (141 mg, 0.74 mmol). After purged with argon for three times, Et<sub>3</sub>N (205 μL, 1.48 mmol) and 1-hexyne (101 μL, 0.89 mmol) were added to the solution at room temperature and the solution was stirred overnight. The reaction mixture was quenched with saturated aqueous NH<sub>4</sub>Cl and extracted with CH<sub>2</sub>Cl<sub>2</sub>. The combined organic layers were washed with brine, dried over Na<sub>2</sub>SO<sub>4</sub>, filtered, and concentrated under reduced pressure. The residue was purified by silica gel column chromatography (petroleum ether/EtOAc: 15/1→10/1) to give **10** (410 mg, 85%) as an orange syrup.  $[\alpha]_D^{25} = -36.1$  (*c* 0.53, CHCl<sub>3</sub>); <sup>1</sup>H NMR (600 MHz, CDCl<sub>3</sub>) δ 8.07 (dd, *J* = 1.2, 8.4 Hz, 2 H), 7.57–7.54 (m, 1 H), 7.41 (t, *J* = 7.8 Hz, 2 H), 7.36 (d, *J* = 7.2 Hz, 2 H), 7.33–7.30 (m, 2 H), 7.28–7.26 (m, 1 H), 6.56 (s, 1 H), 6.21 (dt, *J* = 2.4, 11.4 Hz, 1 H), 6.00 (d, *J* = 11.4 Hz, 1 H), 5.17 (t, *J* = 2.4 Hz, 1 H), 4.90 (d, *J* = 2.4 Hz, 1 H), 4.84 (d-like, *J* = 12.0 Hz, 1 H), 4.71 (d-like, *J* = 12.0 Hz, 1 H), 4.12 (t, *J* = 3.0 Hz, 1 H), 3.86 (m, 1 H), 3.79 (s, 3 H), 2.42 (td, *J* = 2.4, 7.2 Hz, 1 H), 1.57–1.52 (m, 2 H), 1.45–1.39 (m, 2 H), 0.91 (t, *J* = 7.2 Hz, 3 H), 0.67 (s, 9 H), -0.10 (s, 3 H), -0.32 (s, 3 H); <sup>13</sup>C NMR (100 MHz, CDCl<sub>3</sub>) δ 169.6, 165.8, 162.5, 137.7, 133.5, 130.3, 129.5, 128.6, 128.4, 128.2, 128.1, 126.3, 126.1, 106.2, 92.4 (<sup>1</sup>*J*<sub>C1,H1</sub> = 174.6 Hz), 78.0, 74.2, 72.5, 71.3, 68.9, 67.4, 52.3, 30.5, 25.6, 22.2, 20.0, 17.9, 13.8, -4.3, -5.6; HRMS (ESI) *m/z* calcd for C<sub>36</sub>H<sub>46</sub>O<sub>9</sub>SiNa [M + Na]<sup>+</sup> 673.2809, found 673.2808.

**2.8. Synthesis of 2-methyl-5-*tert*-butylphenyl (methyl 2-*O*-benzoyl-3-*O*-benzyl-4-*O*-*tert*-butyldimethylsilyl- $\alpha$ -L-idopyranosyl uronate)-(1 $\rightarrow$ 4)-2-*O*-benzoyl-3-*O*-(4-methoxybenzyl)-1-thio- $\alpha$ -L-rhamnopyranoside **11****

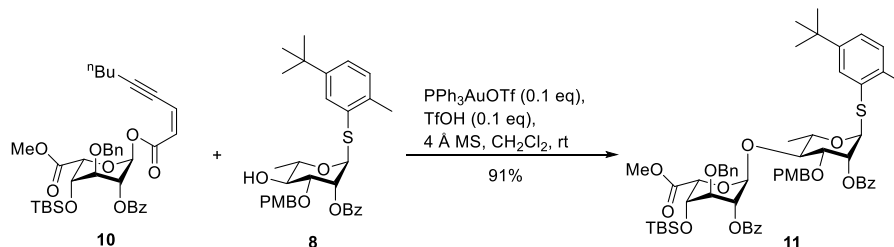

A solution of donor **10** (405 mg, 0.62 mmol), acceptor **8** (225.6 mg, 0.41 mmol) and freshly activated 4 Å MS (650 mg) in anhydrous CH<sub>2</sub>Cl<sub>2</sub> (15.0 mL) was stirred at room temperature for 0.5 h under argon. A freshly prepared solution of PPh<sub>3</sub>AuOTf in CH<sub>2</sub>Cl<sub>2</sub> (0.82 mL, 0.05 M) and TfOH (3.6 μL, 0.041 mmol) were added successively and the solution was stirred overnight. The mixture was quenched with Et<sub>3</sub>N and filtered through Celite, and the filtrate was concentrated under reduced pressure. The residue was purified by silica gel column chromatography (toluene/EtOAc: 30/1 $\rightarrow$ 20/1) to give **11** (389.6 mg, 91%) as a slightly yellow foam.  $[\alpha]_D^{25} = -41.0$  (*c* 0.89, CHCl<sub>3</sub>); <sup>1</sup>H NMR (600 MHz, CDCl<sub>3</sub>) δ 8.06 (m, 2 H), 7.98 (m, 2 H), 7.59–7.57 (m, 2 H), 7.52 (t, *J* = 7.2 Hz, 1 H), 7.48–7.44 (m, 4 H), 7.39 (t, *J* = 7.8 Hz, 2 H), 7.35 (t, *J* = 7.8 Hz, 2 H), 7.30 (t, *J* = 7.2 Hz, 1 H), 7.22 (dd, *J* = 1.8, 7.8 Hz, 1 H), 7.16 (d, *J* = 7.8 Hz, 1 H), 7.03 (d, *J* = 8.4 Hz, 2 H), 6.44 (d, *J* = 8.4 Hz, 2 H), 5.83 (t, *J* = 1.8 Hz, 1 H), 5.70 (s, 1 H), 5.47 (d, *J* = 1.2 Hz, 1 H), 5.14 (s, 1 H), 4.93 (d, *J* = 11.4 Hz, 1 H), 4.90 (d, *J* = 1.8 Hz, 1 H), 4.74 (d, *J* = 11.4 Hz, 1 H), 4.59 (d, *J* = 10.8 Hz, 1 H), 4.39–4.34 (m, 2 H), 4.10 (br s, 1 H), 4.02–3.97 (m, 2 H), 3.77 (m, 4 H), 3.46 (s, 3 H), 2.46 (s, 3 H), 1.38 (d, *J* = 6.6 Hz, 3 H), 1.30 (s, 9 H), 0.62 (s, 9 H), -0.11 (s, 3 H), -0.36 (s, 3 H); <sup>13</sup>C NMR (150 MHz, CDCl<sub>3</sub>) δ 170.2, 166.0, 165.8, 159.1, 150.0, 138.2, 137.0, 133.4, 133.3, 132.8, 130.4, 130.3, 130.2, 130.1, 129.8, 129.6, 129.3, 128.6, 128.5, 128.3, 128.2, 128.0, 125.3, 113.8, 100.5, 86.1, 79.1, 78.0, 74.3, 72.1, 70.8, 70.7, 69.2, 68.9, 68.5, 68.1, 55.0, 52.2, 34.6, 31.5, 25.6, 20.6, 18.5, 17.9, -4.2, -5.7; HRMS (ESI) *m/z* calcd for C<sub>59</sub>H<sub>72</sub>O<sub>13</sub>SSiNa [M + Na]<sup>+</sup> 1071.4361, found 1071.4363.

**2.9. Synthesis of 2-methyl-5-*tert*-butylphenyl (methyl 2-*O*-benzoyl-3-*O*-benzyl- $\alpha$ -L-idopyranosyl uronate)-(1 $\rightarrow$ 4)-2-*O*-benzoyl-3-*O*-(4-methoxybenzyl)-1-thio- $\alpha$ -L-rhamnopyranoside **12****



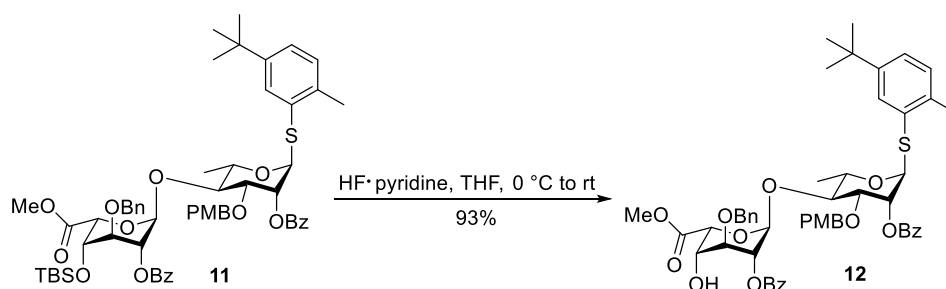

To a solution of **11** (87.6 mg, 0.084 mmol) in anhydrous THF (1.2 mL) was added slowly 70% HF pyridine (324  $\mu$ L, 2.52 mmol) at 0  $^{\circ}$ C. The reaction was gradually warmed to room temperature and stirred for 2 d. The reaction was quenched with saturated aqueous  $\text{NaHCO}_3$  and extracted with  $\text{CH}_2\text{Cl}_2$ . The combined organic layers were dried over  $\text{Na}_2\text{SO}_4$ , filtered, and concentrated under reduced pressure. The residue was purified by silica gel column chromatography (petroleum ether/EtOAc: 4/1 $\rightarrow$ 2/1) to afford **12** (73.1 mg, 93%) as a white foam.  $[\alpha]_{\text{D}}^{25} = -34.4$  ( $c$  0.66,  $\text{CHCl}_3$ );  $^1\text{H}$  NMR (600 MHz,  $\text{CDCl}_3$ )  $\delta$  8.05 (m, 2 H), 7.92 (dd,  $J = 0.6, 7.8$  Hz, 2 H), 7.59–7.56 (m, 3 H), 7.46 (t,  $J = 7.8$  Hz, 2 H), 7.43–7.39 (m, 6 H), 7.33–7.30 (m, 1 H), 7.24 (dd,  $J = 1.8, 7.8$  Hz, 1 H), 7.17 (d,  $J = 7.8$  Hz, 1 H), 7.08 (d,  $J = 8.4$  Hz, 2 H), 6.50 (d,  $J = 9.0$  Hz, 2 H), 5.87 (dd,  $J = 1.8, 3.0$  Hz, 1 H), 5.65 (s, 1 H), 5.47 (d,  $J = 1.2$  Hz, 1 H), 5.28 (m, 1 H), 5.00 (d,  $J = 1.2$  Hz, 1 H), 4.84 (d-like,  $J = 11.4$  Hz, 1 H), 4.70 (d-like,  $J = 11.4$  Hz, 1 H), 4.63 (d-like,  $J = 10.8$  Hz, 1 H), 4.39–4.34 (m, 2 H), 4.09 (d,  $J = 12.0$  Hz, 1 H), 4.03 (dd,  $J = 3.0, 9.0$  Hz, 1 H), 3.97 (t,  $J = 9.6$  Hz, 1 H), 3.89 (t,  $J = 2.4$  Hz, 1 H), 3.79 (s, 3 H), 3.46 (s, 3 H), 2.70 (d,  $J = 12.0$  Hz, 1 H), 2.46 (s, 3 H), 1.37 (d,  $J = 6.0$  Hz, 3 H), 1.31 (s, 9 H);  $^{13}\text{C}$  NMR (150 MHz,  $\text{CDCl}_3$ )  $\delta$  170.1, 165.9, 164.9, 159.2, 150.0, 137.9, 137.1, 133.7, 133.5, 132.6, 130.5, 130.3, 130.1, 129.9, 129.8, 129.7, 129.2, 129.1, 128.7, 128.6, 128.1, 125.5, 113.8, 100.3, 86.2, 78.9, 78.0, 74.1, 72.2, 70.7, 70.6, 68.7, 68.4, 68.2, 67.5, 55.0, 52.6, 34.6, 31.5, 20.6, 18.5; HRMS (ESI)  $m/z$  calcd for  $\text{C}_{53}\text{H}_{58}\text{O}_{13}\text{SNa}$   $[\text{M} + \text{Na}]^+$  957.3496, found 957.3495.

**2.10. Synthesis of methyl 2-*O*-benzoyl-3-*O*-benzyl-4-*O*-*tert*-butyldimethylsilyl- $\alpha$ -L-idopyranosyl uronate-(1 $\rightarrow$ 4)-2-*O*-benzoyl-3-*O*-(4-methoxybenzyl)- $\alpha$ -L-rhamnopyranosyl (*Z*)-ynenoate **13****

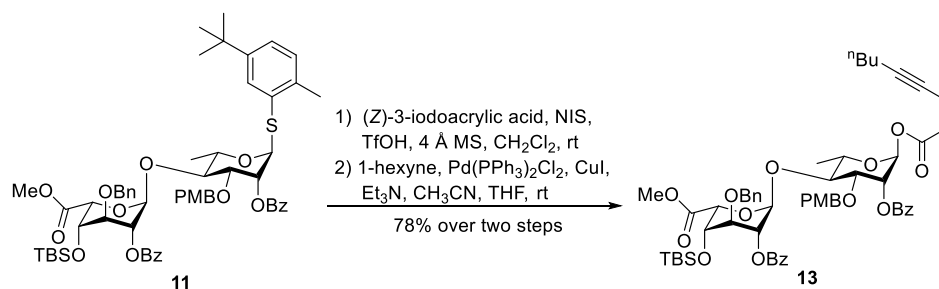

To a solution of **11** (244 mg, 0.23 mmol) in anhydrous CH<sub>2</sub>Cl<sub>2</sub> (5.5 mL) was added (Z)-3-iodoacrylic acid (69.3 mg, 0.35 mmol) and 4 Å MS (350 mg). Then NIS (103.5 mg, 0.46 mmol) and TfOH (3.0 μL, 0.035 mmol) were added. After being stirred at room temperature for 5 h, the reaction mixture was neutralized with Et<sub>3</sub>N and filtered through Celite. The filtrate was diluted with CH<sub>2</sub>Cl<sub>2</sub>, washed with saturated aqueous Na<sub>2</sub>S<sub>2</sub>O<sub>3</sub> and brine, dried over Na<sub>2</sub>SO<sub>4</sub>, filtered, and concentrated under reduced pressure. The residue was purified by silica gel column chromatography (petroleum ether/EtOAc: 15/1→10/1) to give the corresponding glycosyl (Z)-3-iodoacrylate (204.8 mg, 84%) as a yellow syrup. To a solution of the above glycosyl (Z)-3-iodoacrylate (204.8 mg, 0.19 mmol) in anhydrous CH<sub>3</sub>CN/THF (2/1, v/v, 12.9 mL) were added Pd(PPh<sub>3</sub>)<sub>2</sub>Cl<sub>2</sub> (7.0 mg, 0.01 mmol) and CuI (36.1 mg, 0.19 mmol). After purged with argon for three times, Et<sub>3</sub>N (53 μL, 0.38 mmol) and 1-hexyne (43 μL, 0.38 mmol) were added to the solution at room temperature and the solution was stirred overnight. The reaction mixture was quenched with saturated aqueous NH<sub>4</sub>Cl and extracted with CH<sub>2</sub>Cl<sub>2</sub>. The combined organic layers were washed with brine, dried over Na<sub>2</sub>SO<sub>4</sub>, filtered, and concentrated under reduced pressure. The residue was purified by silica gel column chromatography (petroleum ether/EtOAc: 15/1→8/1) to give **13** (179.4 mg, 93%) as an orange syrup.  $[\alpha]_D^{25} = -24.9$  (*c* 0.71, CHCl<sub>3</sub>); <sup>1</sup>H NMR (600 MHz, CDCl<sub>3</sub>) δ 8.07 (m, 2 H), 7.94 (m, 2 H), 7.59 (t, *J* = 7.8 Hz, 1 H), 7.51 (t, *J* = 7.8 Hz, 1 H), 7.47 (t, *J* = 7.8 Hz, 2 H), 7.39 (d, *J* = 7.2 Hz, 2 H), 7.35–7.32 (m, 4 H), 7.28 (t, *J* = 7.2 Hz, 1 H), 6.99 (d, *J* = 8.4 Hz, 2 H), 6.41 (d, *J* = 9.0 Hz, 2 H), 6.30 (dt, *J* = 2.4, 11.4 Hz, 1 H), 6.27 (d, *J* = 1.8 Hz, 1 H), 6.06 (d, *J* = 11.4 Hz, 1 H), 5.72 (s, 1 H), 5.60 (m, 1 H), 5.08 (s, 1 H), 4.85 (d-like, *J* = 12.0 Hz, 1 H), 4.83 (d, *J* = 2.4 Hz, 1 H), 4.71 (d-like, *J* = 12.0 Hz, 1 H), 4.59 (d-like, *J* = 10.8 Hz, 1 H), 4.30 (d-like, *J* = 10.8 Hz, 1 H), 4.06 (t-like, *J* = 1.8 Hz, 1 H), 4.04 (dd, *J* = 3.0, 9.0 Hz, 1 H), 4.00–3.94 (m, 2 H), 3.76 (s, 3 H), 3.72 (t, *J* = 2.4 Hz, 1 H), 3.47 (s, 3 H), 2.45–2.41 (m, 2 H), 1.57–1.52 (m, 2 H), 1.47–1.41 (m, 2 H), 1.37 (d, *J* = 5.4 Hz, 3 H), 0.91 (t, *J* = 7.8 Hz, 3 H), 0.61 (s, 9 H), -0.15 (s, 3 H), -0.40 (s, 3 H);

$^{13}\text{C}$  NMR (150 MHz,  $\text{CDCl}_3$ )  $\delta$  170.1, 165.8, 165.7, 162.4, 159.0, 138.0, 133.5, 133.3, 130.2, 129.7, 129.6, 129.4, 128.6, 128.5, 128.3, 128.2, 128.1, 126.2, 126.1, 113.7, 106.3, 100.2 ( $^1J_{\text{C1,H1}} = 175.2$  Hz), 91.5 ( $^1J_{\text{C1,H1}} = 175.2$  Hz), 78.2, 77.6, 74.5, 72.2, 70.8, 69.7, 69.4, 68.7, 67.8, 55.0, 52.2, 30.5, 25.6, 22.2, 20.1, 18.6, 17.8, 13.8, -4.3, -5.8; HRMS (ESI)  $m/z$  calcd for  $\text{C}_{57}\text{H}_{68}\text{O}_{15}\text{SiNa}$   $[\text{M} + \text{Na}]^+$  1043.4225, found 1043.4224.

**2.11. Synthesis of 2-methyl-5-*tert*-butylphenyl (methyl 2-*O*-benzoyl-3-*O*-benzyl-4-*O*-*tert*-butyldimethylsilyl- $\alpha$ -L-idopyranosyl uronate)-(1 $\rightarrow$ 4)-2-*O*-benzoyl-3-*O*-(4-methoxybenzyl)- $\alpha$ -L-rhamnopyranosyl-(1 $\rightarrow$ 4)-(methyl 2-*O*-benzoyl-3-*O*-benzyl- $\alpha$ -L-idopyranosyl uronate)-(1 $\rightarrow$ 4)-2-*O*-benzoyl-3-*O*-(4-methoxybenzyl)-1-thio- $\alpha$ -L-rhamnopyranoside **14****

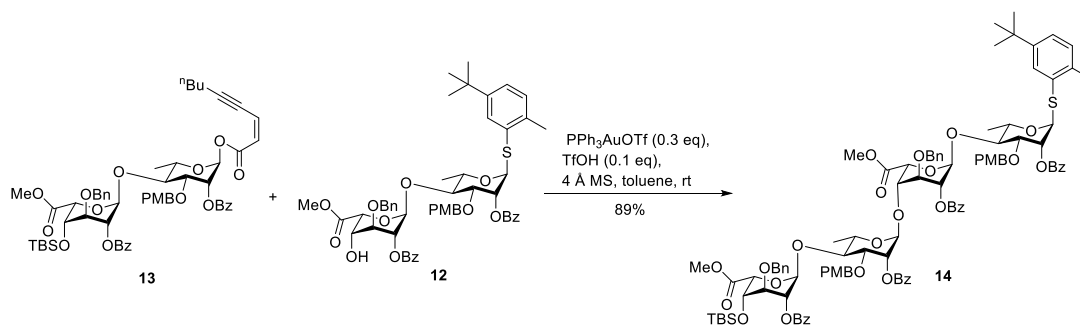

A solution of donor **13** (605.5 mg, 0.59 mmol), acceptor **12** (334.8 mg, 0.36 mmol) and freshly activated 4 Å MS (1.2 g) in anhydrous toluene (14 mL) was stirred at room temperature for 0.5 h under argon. A freshly prepared solution of  $\text{PPh}_3\text{AuOTf}$  in  $\text{CH}_2\text{Cl}_2$  (2.2 mL, 0.05 M) and a solution of TfOH in  $\text{CH}_2\text{Cl}_2$  (25.6  $\mu\text{L}$ , 1.40 M) were added successively and the solution was stirred overnight. The mixture was quenched with  $\text{Et}_3\text{N}$  and filtered through Celite, and the filtrate was concentrated under reduced pressure. The residue was purified by silica gel column chromatography (toluene/EtOAc: 30/1 $\rightarrow$ 20/1) to give **14** (578.1 mg, 89%) as a slightly yellow foam.  $[\alpha]_{\text{D}}^{25} = -49.7$  ( $c$  0.56,  $\text{CHCl}_3$ );  $^1\text{H}$  NMR (600 MHz,  $\text{CDCl}_3$ )  $\delta$  8.05 (m, 2 H), 8.01 (m, 2 H), 7.96 (m, 2 H), 7.93 (m, 2 H), 7.58–7.55 (m, 4 H), 7.51 (t,  $J = 7.2$  Hz, 1 H), 7.47–7.32 (m, 16 H), 7.30–7.27 (m, 2 H), 7.23 (dd,  $J = 1.8, 7.8$  Hz, 1 H), 7.16 (d,  $J = 7.8$  Hz, 1 H), 7.03 (d,  $J = 8.4$  Hz, 2 H), 6.88 (d,  $J = 8.4$  Hz, 2 H), 6.43 (d,  $J = 8.4$  Hz, 2 H), 6.34 (d,  $J = 8.4$  Hz, 2 H), 5.85 (dd,  $J = 1.8, 2.4$  Hz, 1 H), 5.76 (s, 1 H), 5.54 (s, 1 H), 5.47 (d,  $J = 1.2$  Hz, 1 H), 5.33 (dd,  $J = 1.8, 3.0$  Hz, 1 H), 5.23 (s, 1 H), 4.99 (d,  $J = 2.4$  Hz, 1 H), 4.89 (d-like,  $J = 12.0$  Hz, 1 H), 4.86 (d-like,  $J = 9.6$  Hz,

2 H), 4.76 (t,  $J = 12.6$  Hz, 2 H), 4.63–4.59 (m, 3 H), 4.39–4.31 (m, 3 H), 4.18 (br s, 1 H), 4.05–3.98 (m, 5 H), 3.87 (s, 3 H), 3.76 (t,  $J = 9.6$  Hz, 1 H), 3.75 (s, 3 H), 3.68 (dd,  $J = 3.6, 9.6$  Hz, 1 H), 3.64 (br s, 1 H), 3.60–3.55 (m, 1 H), 3.45 (s, 3 H), 3.42 (s, 3 H), 2.46 (s, 3 H), 1.37 (d,  $J = 6.6$  Hz, 3 H), 1.30 (s, 9 H), 0.89 (d,  $J = 6.0$  Hz, 3 H), 0.58 (s, 9 H), -0.18 (s, 3 H), -0.44 (s, 3 H);  $^{13}\text{C}$  NMR (150 MHz,  $\text{CDCl}_3$ )  $\delta$  170.1, 169.8, 166.0, 165.8, 165.7, 165.5, 159.1, 158.9, 150.0, 137.9, 137.0, 133.8, 133.5, 133.3, 133.2, 132.7, 130.4, 130.3, 130.2, 130.1, 129.8, 129.7, 129.6, 129.5, 129.3, 129.1, 128.7, 128.6, 128.5, 128.4, 128.3, 128.2, 128.1, 128.0, 125.4, 113.8, 113.6, 100.2, 99.8, 86.1, 78.5, 78.2, 78.1, 76.9, 75.2, 74.3, 73.8, 72.5, 72.1, 70.8, 70.7, 69.2, 68.9, 68.7, 68.6, 68.4, 68.3, 67.7, 67.6, 55.1, 55.0, 52.8, 52.2, 34.6, 31.5, 31.4, 25.6, 20.6, 18.6, 18.0, 17.8, -4.3, -5.8; HRMS (ESI)  $m/z$  calcd for  $\text{C}_{101}\text{H}_{114}\text{O}_{26}\text{SSiNa}$   $[\text{M} + \text{Na}]^+$  1825.6986, found 1825.6962.

**2.12. Synthesis of methyl 2-*O*-benzoyl-3-*O*-benzyl-4-*O*-*tert*-butyldimethylsilyl- $\alpha$ -L-idopyranosyl uronate-(1 $\rightarrow$ 4)-2-*O*-benzoyl-3-*O*-(4-methoxybenzyl)- $\alpha$ -L-rhamnopyranosyl-(1 $\rightarrow$ 4)-(methyl 2-*O*-benzoyl-3-*O*-benzyl- $\alpha$ -L-idopyranosyl uronate)-(1 $\rightarrow$ 4)-(N-benzyl-benzyloxycarbonyl-5-aminopentyl 2-*O*-benzoyl-3-*O*-(4-methoxybenzyl)- $\alpha$ -L-rhamnopyranoside) **16****

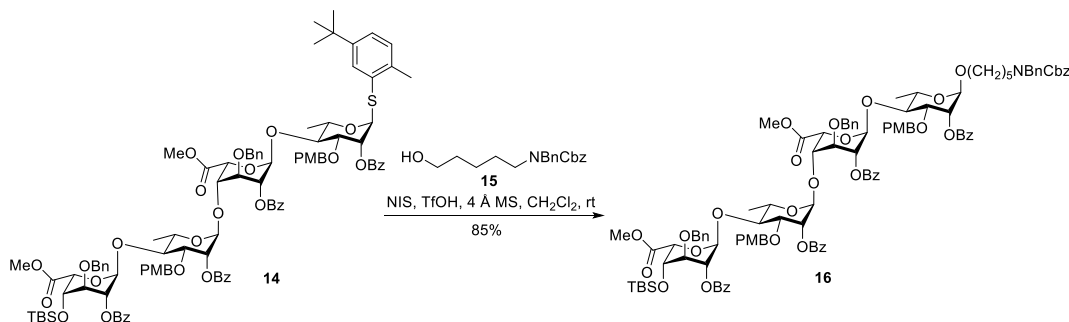

A solution of **14** (578.1 mg, 0.32 mmol), linker **15**<sup>4</sup> (209.4 mg, 0.64 mmol), and freshly activated 4 Å MS (900.0 mg) in anhydrous  $\text{CH}_2\text{Cl}_2$  (9.0 mL) was stirred at room temperature for 0.5 h under argon. Then NIS (144 mg, 0.64 mmol) and TfOH (4.2  $\mu\text{L}$ , 0.048 mmol) were added. After being stirred at room temperature for 4 h, the reaction mixture was neutralized with  $\text{Et}_3\text{N}$  and filtered through Celite. The filtrate was diluted with  $\text{CH}_2\text{Cl}_2$ , washed with saturated aqueous  $\text{Na}_2\text{S}_2\text{O}_3$  and brine, dried over  $\text{Na}_2\text{SO}_4$ , filtered, and concentrated under reduced pressure. The residue was purified by silica gel column chromatography (petroleum ether/EtOAc: 6/1 $\rightarrow$ 3/1) to give **16** (531.4 mg, 85%) as a slightly yellow foam.  $[\alpha]_{\text{D}}^{25} = -17.4$  ( $c$  0.49,  $\text{CHCl}_3$ );  $^1\text{H}$

NMR (600 MHz, CDCl<sub>3</sub>) δ 8.05 (m, 2 H), 8.00 (m, 2 H), 7.93–7.91 (m, 4 H), 7.58–7.54 (m, 3 H), 7.52–7.50 (m, 1 H), 7.47–7.43 (m, 4 H), 7.38–7.18 (m, 24 H), 6.96 (d, *J* = 8.4 Hz, 2 H), 6.87 (d, *J* = 9.0 Hz, 2 H), 6.36 (d, *J* = 9.0 Hz, 2 H), 6.33 (d, *J* = 9.0 Hz, 2 H), 5.76 (s, 1 H), 5.54 (br s, 2 H), 5.32 (dd, *J* = 1.8, 3.0 Hz, 1 H), 5.19 (t, *J* = 10.2 Hz, 3 H), 4.96 (d, *J* = 2.4 Hz, 1 H), 4.85–4.81 (m, 4 H), 4.75 (d-like, *J* = 11.4 Hz, 1 H), 4.72 (d-like, *J* = 12.0 Hz, 1 H), 4.62–4.60 (m, 2 H), 4.57–4.51 (m, 3 H), 4.32 (d, *J* = 10.2 Hz, 1 H), 4.28 (d, *J* = 10.2 Hz, 1 H), 4.16 (br s, 1 H), 4.00–3.96 (m, 4 H), 3.91 (t, *J* = 9.6 Hz, 1 H), 3.87 (s, 3 H), 3.80–3.74 (m, 5 H), 3.68–3.53 (m, 4 H), 3.43 (s, 3 H), 3.41 (s, 3 H), 3.39–3.23 (m, 3 H), 1.61–1.55 (m, 4 H), 1.34 (d, *J* = 6.6 Hz, 3 H), 1.28–1.26 (m, 2 H), 0.86 (d, *J* = 6.6 Hz, 3 H), 0.58 (s, 9 H), -0.18 (s, 3 H), -0.45 (s, 3 H); <sup>13</sup>C NMR (150 MHz, CDCl<sub>3</sub>) δ 170.1, 169.8, 166.1, 165.8, 165.7, 165.5, 158.9, 158.8, 138.1, 137.9, 137.8, 133.7, 133.4, 133.3, 133.2, 130.3, 130.1, 129.9, 129.8, 129.7, 129.6, 129.4, 129.3, 129.1, 128.7, 128.6, 128.5, 128.4, 128.3, 128.2, 128.1, 128.0, 127.9, 127.5, 127.4, 113.6, 100.1, 100.0, 99.8, 97.8, 78.1, 78.0, 75.1, 74.3, 73.9, 73.8, 72.5, 72.1, 70.8, 70.7, 69.2, 69.0, 68.9, 68.7, 68.6, 68.3, 68.0, 67.9, 67.8, 67.4, 67.0, 55.0, 54.9, 52.8, 52.1, 50.8, 50.5, 47.3, 46.3, 29.3, 28.1, 27.7, 25.6, 23.5, 18.6, 18.0, 17.8, -4.3, -5.8; HRMS (ESI) *m/z* calcd for C<sub>110</sub>H<sub>123</sub>O<sub>29</sub>NSiNa [M + Na]<sup>+</sup> 1973.7881, found 1973.7882.

**2.13. Synthesis of methyl 2-*O*-benzoyl-3-*O*-benzyl-4-*O*-acetyl- $\alpha$ -L-idopyranosyl uronate-(1→4)-2-*O*-benzoyl-3-*O*-(4-methoxybenzyl)- $\alpha$ -L-rhamnopyranosyl-(1→4)-(methyl 2-*O*-benzoyl-3-*O*-benzyl- $\alpha$ -L-idopyranosyl uronate)-(1→4)-(N-benzyl-benzyloxycarbonyl-5-aminopentyl 2-*O*-benzoyl-3-*O*-(4-methoxybenzyl)- $\alpha$ -L-rhamnopyranoside) **17****

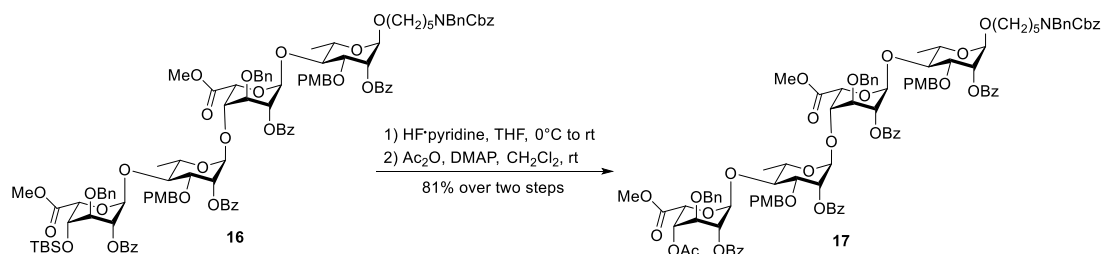

To a solution of **16** (531.4 mg, 0.27 mmol) in anhydrous THF (29 mL) was added slowly 70% HF pyridine (7.9 mL) at 0 °C. The reaction was then gradually warmed to room temperature and stirred for 2 d. The reaction was quenched with saturated aqueous NaHCO<sub>3</sub> and extracted with CH<sub>2</sub>Cl<sub>2</sub>. The combined organic layers were dried over Na<sub>2</sub>SO<sub>4</sub>, filtered, and concentrated under reduced pressure. The

residue was purified by silica gel column chromatography (petroleum ether/EtOAc: 4/1→2/1) to afford the corresponding alcohol **S1** (418 mg, 84%) as a white foam.  $[\alpha]_{\text{D}}^{25} = -16.3$  (*c* 0.28, CHCl<sub>3</sub>); <sup>1</sup>H NMR (600 MHz, CDCl<sub>3</sub>) δ 8.05 (m, 2 H), 7.98 (m, 2 H), 7.90 (m, 2 H), 7.87 (m, 2 H), 7.60–7.54 (m, 4 H), 7.47–7.19 (m, 28 H), 6.96 (d, *J* = 8.4 Hz, 2 H), 6.89 (d, *J* = 8.4 Hz, 2 H), 6.37 (d, *J* = 8.4 Hz, 2 H), 6.35 (d, *J* = 8.4 Hz, 2 H), 5.76 (s, 1 H), 5.54 (br s, 1 H), 5.52 (s, 1 H), 5.38 (dd, *J* = 1.8, 3.0 Hz, 1 H), 5.20–5.17 (m, 3 H), 4.98 (m, 2 H), 4.87–4.82 (m, 3 H), 4.73 (d-like, *J* = 12.0 Hz, 1 H), 4.69 (d, *J* = 1.2 Hz, 1 H), 4.62 (d-like, *J* = 11.4 Hz, 1 H), 4.56 (d, *J* = 10.2 Hz, 1 H), 4.54–4.52 (m, 3 H), 4.35 (d, *J* = 10.2 Hz, 1 H), 4.28 (d, *J* = 10.2 Hz, 1 H), 4.17 (br s, 1 H), 4.00–3.95 (m, 4 H), 3.92 (t, *J* = 9.6 Hz, 1 H), 3.89 (s, 3 H), 3.80 (m, 1 H), 3.77 (s, 3 H), 3.76–3.54 (m, 5 H), 3.43 (s, 3 H), 3.41 (s, 3 H), 3.36–3.23 (m, 3 H), 2.58 (d, *J* = 11.4 Hz, 1 H), 1.62–1.54 (m, 4 H), 1.34 (d, *J* = 6.0 Hz, 3 H), 1.29 (m, 2 H), 0.87 (d, *J* = 6.0 Hz, 3 H); <sup>13</sup>C NMR (150 MHz, CDCl<sub>3</sub>) δ 169.9, 169.8, 166.1, 165.7, 165.4, 164.8, 159.0, 158.9, 138.1, 137.9, 137.5, 133.7, 133.6, 133.4, 130.3, 130.1, 130.0, 129.9, 129.8, 129.7, 129.5, 129.4, 129.3, 129.2, 128.8, 128.7, 128.6, 128.5, 128.2, 128.1, 128.0, 127.9, 127.5, 127.4, 113.7, 113.6, 100.1, 100.0, 99.5, 97.8, 78.3, 78.1, 78.0, 76.1, 75.0, 74.0, 73.8, 73.7, 72.4, 72.2, 70.8, 70.7, 69.0, 68.8, 68.3, 68.2, 68.0, 67.9, 67.7, 67.6, 67.4, 67.3, 67.0, 55.0, 52.9, 52.5, 50.8, 50.5, 47.3, 46.3, 29.4, 28.1, 27.7, 23.6, 18.6, 18.0; HRMS (ESI) *m/z* calcd for C<sub>104</sub>H<sub>109</sub>O<sub>29</sub>NNa [M + Na]<sup>+</sup> 1859.7017, found 1859.7021.

To a solution of the above alcohol **S1** (418 mg, 0.23 mmol) and DMAP (56.2 mg, 0.46 mmol) in anhydrous CH<sub>2</sub>Cl<sub>2</sub> (25.0 mL) was added Ac<sub>2</sub>O (217 μL) under argon. The reaction was then stirred at room temperature for 5 h. The reaction was quenched with saturated aqueous NaHCO<sub>3</sub> and extracted with CH<sub>2</sub>Cl<sub>2</sub>. The combined organic layers were dried over Na<sub>2</sub>SO<sub>4</sub>, filtered, and concentrated under reduced pressure. The residue was purified by silica gel column chromatography (petroleum ether/EtOAc: 4/1→2/1) to afford **17** (416.2 mg, 96%) as a white foam.  $[\alpha]_{\text{D}}^{25} = -9.1$  (*c* 0.58, CHCl<sub>3</sub>); <sup>1</sup>H NMR (600 MHz, CDCl<sub>3</sub>) δ 8.06 (m, 2 H), 7.99–7.97 (m, 4 H), 7.90 (d-like, *J* = 7.2 Hz, 2 H), 7.60–7.53 (m, 4 H), 7.47–7.18 (m, 28 H), 6.97 (d, *J* = 8.4 Hz, 2 H), 6.88 (d, *J* = 8.4 Hz, 2 H), 6.36–6.34 (m, 4 H), 5.76 (s, 1 H), 5.56 (br s, 2 H), 5.35 (dd, *J* = 1.8, 3.0 Hz, 1 H), 5.21–5.16 (m, 4 H), 4.97 (d, *J* = 1.8 Hz, 1 H), 4.94 (s, 1 H), 4.86–4.82 (m, 3 H), 4.75–4.73 (m, 2 H), 4.67 (d-like, *J* = 11.4 Hz, 1 H), 4.62 (d-like, *J* = 11.4 Hz, 1 H), 4.57 (d-like, *J* = 10.2 Hz, 1 H), 4.53–4.51 (m, 2 H), 4.33 (d, *J* = 10.2 Hz, 1 H), 4.28 (d, *J* = 10.2 Hz, 1 H), 4.17 (br s, 1 H), 4.00 (m, 1 H), 3.97–3.91 (m, 3 H), 3.89 (s,

3 H), 3.79 (m, 2 H), 3.76–3.73 (m, 4 H), 3.68–3.51 (m, 3 H), 3.42 (s, 3 H), 3.39 (s, 3 H), 3.35–3.23 (m, 3 H), 1.78 (s, 3 H), 1.63–1.56 (m, 4 H), 1.35 (d,  $J = 6.0$  Hz, 3 H), 1.29 (m, 2 H), 0.86 (d,  $J = 6.0$  Hz, 3 H);  $^{13}\text{C}$  NMR (150 MHz,  $\text{CDCl}_3$ )  $\delta$  170.0, 169.8, 169.0, 166.1, 165.7, 165.5, 164.9, 159.0, 158.9, 138.1, 137.9, 137.4, 137.0, 133.7, 133.6, 133.4, 133.3, 130.3, 130.1, 130.0, 129.9, 129.8, 129.6, 129.5, 129.4, 129.3, 128.7, 128.6, 128.5, 128.4, 128.2, 128.0, 127.9, 127.5, 127.4, 127.3, 113.7, 113.6, 100.2 ( $^1J_{\text{C1,H1}} = 171.6$  Hz), 100.0 ( $^1J_{\text{C1,H1}} = 174.0$  Hz), 99.3 ( $^1J_{\text{C1,H1}} = 175.2$  Hz), 97.8 ( $^1J_{\text{C1,H1}} = 172.2$  Hz), 78.2, 78.1, 78.0, 76.0, 75.0, 73.5, 72.4, 72.3, 72.0, 70.8, 70.7, 69.0, 68.9, 68.1, 67.9, 67.7, 67.4, 67.3, 67.1, 67.0, 66.2, 55.0, 52.9, 52.6, 50.8, 50.5, 47.3, 46.3, 29.3, 28.1, 27.7, 23.5, 20.7, 18.6, 17.9; HRMS (ESI)  $m/z$  calcd for  $\text{C}_{106}\text{H}_{111}\text{O}_{30}\text{NNa}$   $[\text{M} + \text{Na}]^+$  1901.7122, found 1901.7124.

#### 2.14. Synthesis of methyl 2-*O*-benzoyl-3-*O*-benzyl-4-*O*-acetyl- $\alpha$ -L-idopyranosyl uronate-(1 $\rightarrow$ 4)-2-*O*-benzoyl- $\alpha$ -L-rhamnopyranosyl-(1 $\rightarrow$ 4)-(methyl 2-*O*-benzoyl-3-*O*-benzyl- $\alpha$ -L-idopyranosyl uronate)-(1 $\rightarrow$ 4)-(N-benzyl-benzyloxycarbonyl-5-aminopentyl 2-*O*-benzoyl- $\alpha$ -L-rhamnopyranoside) **18**

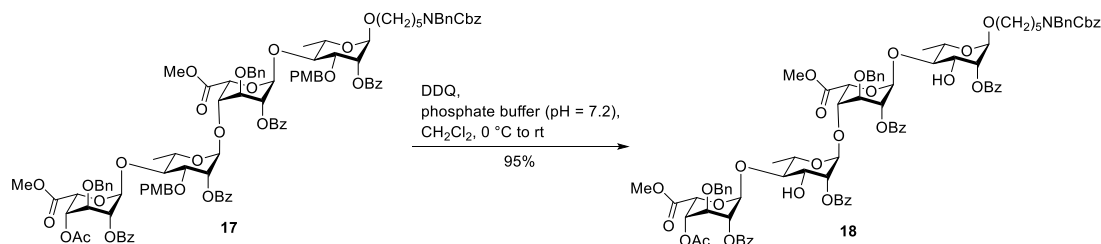

To a solution of **17** (197.1 mg, 0.11 mmol) in dichloromethane and pH 7.2 phosphate buffer (10/1, v/v, 6.2 mL) was added DDQ (119.2 mg, 0.53 mmol) at 0 °C. After stirring at 0 °C for 1 h, the reaction was gradually warmed to room temperature and stirred for 4 h. The reaction was quenched with saturated aqueous  $\text{NaHCO}_3$  and extracted with  $\text{CH}_2\text{Cl}_2$ . The combined organic layers were dried over  $\text{Na}_2\text{SO}_4$ , filtered, and concentrated under reduced pressure. The residue was purified by silica gel column chromatography (petroleum ether/EtOAc: 4/1 $\rightarrow$ 2/1) to afford **18** (170.4 mg, 95%) as a white foam.  $[\alpha]_{\text{D}}^{25} = -20.2$  ( $c$  0.77,  $\text{CHCl}_3$ );  $^1\text{H}$  NMR (600 MHz,  $\text{CDCl}_3$ )  $\delta$  8.11–8.08 (m, 4 H), 8.02–8.00 (m, 4 H), 7.60–7.56 (m, 3 H), 7.51 (t,  $J = 7.2$  Hz, 1 H), 7.48–7.45 (m, 4 H), 7.42 (t,  $J = 7.8$  Hz, 2 H), 7.36–7.17 (m, 22 H), 5.67 (d,  $J = 2.4$  Hz, 1 H), 5.41 (s, 1 H), 5.28–5.24 (m, 3 H), 5.19 (dd,  $J = 1.2, 3.0$  Hz, 2 H), 5.16 (s, 1 H), 5.07 (s, 1 H), 4.97 (d,  $J = 2.4$  Hz, 1 H), 4.93 (s, 1 H), 4.82 (d-like,  $J = 11.4$  Hz, 2 H), 4.74 (d-like,  $J = 12.0$  Hz, 1 H), 4.71 (d,  $J = 1.8$  Hz, 1 H), 4.64 (s, 2 H), 4.50 (d-like,  $J$

= 11.4 Hz, 2 H), 4.20 (t-like,  $J = 3.0$  Hz, 2 H), 4.07–4.04 (m, 1 H), 3.96 (s, 3 H), 3.90 (t,  $J = 3.0$  Hz, 1 H), 3.88–3.86 (m, 2 H), 3.80 (s, 3 H), 3.75 (t,  $J = 9.6$  Hz, 2 H), 3.67–3.58 (m, 2 H), 3.39–3.20 (m, 3 H), 2.99 (d,  $J = 5.4$  Hz, 1 H), 2.80 (d-like,  $J = 9.0$  Hz, 1 H), 2.00 (s, 3 H), 1.58–1.51 (m, 4 H), 1.34 (d,  $J = 6.0$  Hz, 3 H), 1.26 (m, 2 H), 0.93 (d,  $J = 6.0$  Hz, 3 H);  $^{13}\text{C}$  NMR (150 MHz,  $\text{CDCl}_3$ )  $\delta$  170.0, 169.8, 168.8, 166.5, 166.0, 165.8, 165.4, 138.1, 137.3, 137.0, 136.9, 136.7, 133.8, 133.7, 133.5, 130.2, 130.1, 130.0, 129.8, 129.7, 129.4, 129.3, 128.7, 128.6, 128.5, 128.4, 128.3, 128.2, 128.0, 127.5, 127.4, 99.9, 99.3, 99.0, 97.4, 80.1, 78.6, 75.1, 74.9, 74.8, 73.8, 73.2, 73.0, 72.8, 72.7, 70.5, 69.9, 69.2, 69.1, 69.0, 68.1, 67.9, 67.8, 67.5, 67.4, 67.3, 67.0, 66.8, 53.0, 52.7, 50.7, 50.4, 47.3, 46.3, 29.3, 28.1, 27.7, 23.5, 20.8, 18.2, 17.4; HRMS (ESI)  $m/z$  calcd for  $\text{C}_{90}\text{H}_{95}\text{O}_{28}\text{NNa}$   $[\text{M} + \text{Na}]^+$  1660.5938, found 1660.5930.

**2.15. Synthesis of methyl 2-*O*-benzoyl-3-*O*-benzyl-4-*O*-acetyl- $\alpha$ -L-idopyranosyl uronate-(1 $\rightarrow$ 4)-2-*O*-benzoyl-3-*O*-sulfo- $\alpha$ -L-rhamnopyranosyl-(1 $\rightarrow$ 4)-(methyl 2-*O*-benzoyl-3-*O*-benzyl- $\alpha$ -L-idopyranosyl uronate)-(1 $\rightarrow$ 4)-(N-benzyl-benzoyloxycarbonyl-5-aminopentyl 2-*O*-benzoyl-3-*O*-sulfo- $\alpha$ -L-rhamnopyranoside) **19****

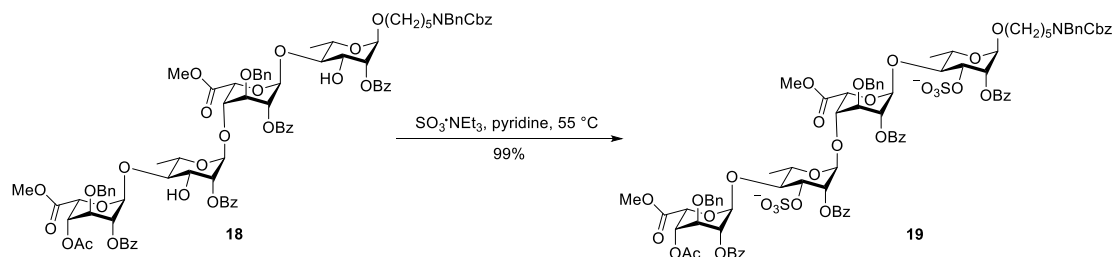

To a solution of **18** (56 mg, 0.034 mmol) in anhydrous pyridine (3.4 mL) was added  $\text{SO}_3 \cdot \text{NEt}_3$  (370 mg, 2.04 mmol). The reaction mixture was stirred at 55 °C for 6 h. The reaction mixture was then quenched with methanol (124 mL, 3.06 mmol), adjusted to pH 7~8 by  $\text{Et}_3\text{N}$ , and concentrated under reduced pressure. The residue was purified by silica gel column chromatography ( $\text{CH}_2\text{Cl}_2/\text{MeOH}$ : 50/1 $\rightarrow$ 30/1, + 1%  $\text{Et}_3\text{N}$ ). The fractions containing product were concentrated *in vacuo*, and the residue was immediately passed through a column of Dowex 50WX8  $\text{Na}^+$  resin using methanol as eluent to provide **19** (60.3 mg, 99%) as a white solid.  $[\alpha]_{\text{D}}^{25} = -38.4$  (c 0.31,  $\text{CH}_3\text{OH}$ );  $^1\text{H}$  NMR (600 MHz,  $\text{CD}_3\text{OD}$ )  $\delta$  8.12 (m, 2 H), 8.09 (m, 2 H), 8.05 (m, 2 H), 7.98 (m, 2 H), 7.62–7.60 (m, 2 H), 7.57 (t,  $J = 7.8$  Hz, 1 H), 7.53–7.44 (m, 7 H), 7.42–7.15 (m, 22 H), 5.79 (s, 1 H), 5.61 (br s, 2 H), 5.55 (s, 1 H), 5.53 (t,  $J = 3.0$  Hz, 1 H), 5.23 (s, 1 H), 5.18–5.14 (m, 2 H), 5.12 (s, 1 H), 5.00 (d,  $J = 2.4$  Hz, 1 H), 4.93 (d,  $J = 8.4$  Hz, 1 H), 4.89–4.82 (m, 4 H), 4.71 (t,  $J = 10.2$  Hz, 2 H), 4.63 (d,  $J = 1.8$  Hz,



1 H), 4.55 (d-like,  $J = 10.8$  Hz, 1 H), 4.51 (s, 2 H), 4.10 (br s, 1 H), 4.04 (t,  $J = 9.0$  Hz, 1 H), 4.00 (t,  $J = 3.0$  Hz, 1 H), 3.94 (s, 3 H), 3.90 (t,  $J = 2.4$  Hz, 1 H), 3.84–3.81 (m, 2 H), 3.76 (s, 3 H), 3.67–3.54 (m, 2 H), 3.44–3.24 (m, 3 H), 1.75 (s, 3 H), 1.61–1.52 (m, 4 H), 1.30 (m, 5 H), 0.61 (d,  $J = 6.0$  Hz, 3 H);  $^{13}\text{C}$  NMR (150 MHz,  $\text{CD}_3\text{OD}$ )  $\delta$  171.3, 171.2, 170.4, 167.3, 167.1, 167.0, 166.5, 139.2, 138.8, 138.1, 134.4, 134.3, 131.3, 131.2, 131.1, 131.0, 130.9, 129.8, 129.7, 129.6, 129.5, 129.4, 129.3, 129.2, 129.1, 129.0, 128.8, 128.7, 128.4, 101.6, 100.9, 100.5, 98.5, 78.7, 78.2, 77.5, 77.1, 74.7, 73.4, 73.3, 73.1, 72.8, 70.0, 69.2, 69.0, 68.9, 68.5, 68.4, 67.8, 53.6, 52.9, 51.7, 51.5, 47.7, 29.0, 28.5, 24.3, 20.5, 18.8, 18.4; HRMS (ESI)  $m/z$  calcd for  $\text{C}_{90}\text{H}_{94}\text{NO}_{34}\text{S}_2$   $[\text{M} - \text{H}]^-$  1796.5104, found 1796.5125.

## 2.16. Synthesis of $\alpha$ -L-idopyranosyl uronate-(1 $\rightarrow$ 4)-3-*O*-sulfo- $\alpha$ -L-rhamnopyranosyl-(1 $\rightarrow$ 4)- $\alpha$ -L-idopyranosyl uronate-(1 $\rightarrow$ 4)-3-*O*-sulfo-5-aminopentyl- $\alpha$ -L-rhamnopyranoside **1**

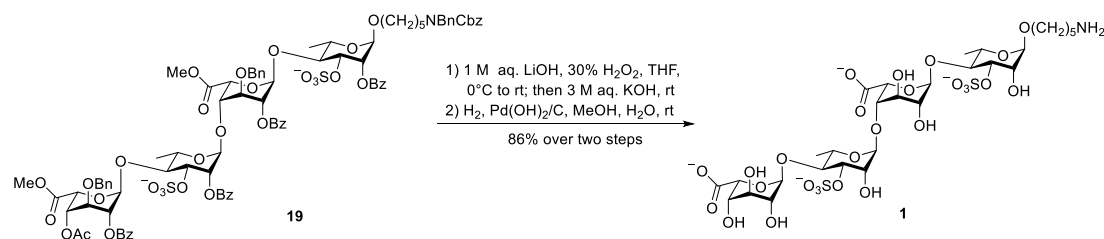

A premixed solution of 30% aqueous  $\text{H}_2\text{O}_2$  (674  $\mu\text{L}$ , 6.6 mmol, 100 equiv per  $\text{CO}_2\text{Me}$ ) and 1 M aqueous  $\text{LiOH}$  (3.3 mL, 3.3 mmol, 50 equiv per  $\text{CO}_2\text{Me}$ ) was added to the solution of **19** (59.2 mg, 0.033 mmol) in THF (1.65 mL). After stirring at room temperature for 24 h, 3 M aqueous  $\text{KOH}$  was added until pH 14. The mixture was stirred for another 24 h at room temperature, adjusted to pH 8 by Amberlite IR-120  $\text{H}^+$  resin, filtered, and concentrated under reduced pressure. The residue was purified by RP-18 column chromatography (MeOH/ $\text{H}_2\text{O}$ : 1/3 $\rightarrow$ 2/1) to afford the corresponding polyol **S2** (37.9 mg, 88%) as a white solid.  $[\alpha]_{\text{D}}^{25} = -81.6$  ( $c$  0.29,  $\text{H}_2\text{O}$ );  $^1\text{H}$  NMR (600 MHz,  $\text{D}_2\text{O}$ )  $\delta$  7.45–7.18 (m, 20 H), 5.21 (s, 1 H), 5.13 (br s, 2 H), 5.09 (s, 1 H), 4.87 (s, 1 H), 4.77–4.74 (m, 2 H), 4.68–4.64 (m, 3 H), 4.56 (dd,  $J = 3.0, 9.6$  Hz, 1 H), 4.54 (d,  $J = 1.8$  Hz, 1 H), 4.49–4.45 (m, 4 H), 4.29 (m, 1 H), 4.25 (s, 1 H), 4.15 (s, 2 H), 4.05 (dd,  $J = 2.4, 4.2$  Hz, 1 H), 3.99 (m, 1 H), 3.78–3.70 (m, 5 H), 3.66 (br s, 1 H), 3.60–3.37 (m, 2 H), 3.24–3.21 (m, 2 H), 1.53–1.44 (m, 4 H), 1.30–1.20 (m, 5 H), 1.03 (br s, 3 H);  $^{13}\text{C}$  NMR (150 MHz,  $\text{D}_2\text{O}$ )  $\delta$  176.0, 175.3, 158.1, 157.7, 137.6, 137.5, 137.2, 136.3, 128.7, 128.6, 128.5, 128.2, 128.1, 127.9, 127.8, 127.5, 127.3,

127.1, 102.4, 102.2, 101.0, 99.3, 79.2, 78.9, 76.9, 76.8, 76.3, 75.9, 74.5, 71.7, 71.5, 70.1, 69.2, 68.9, 68.7, 68.1, 67.7, 67.5, 67.3, 66.7, 66.5, 50.5, 50.4, 47.6, 46.8, 28.3, 28.1, 27.1, 26.9, 22.8, 22.6, 17.1, 17.0; HRMS (ESI)  $m/z$  calcd for  $C_{58}H_{72}O_{29}NS_2$  [ $M - H$ ]<sup>-</sup> 1310.3631, found 1310.3637.

To a solution of the above polyol **S2** (77.9 mg, 0.059 mmol) in  $CH_3OH/H_2O$  (1/3, v/v, 14.4 mL) was added palladium hydroxide on carbon (10%, 623 mg). After purged with hydrogen for five times, the mixture was stirred under an atmosphere of hydrogen for 24 h. The mixture was filtered and concentrated under reduced pressure. The residue was immediately passed through a column of Dowex 50WX8  $Na^+$  resin using  $H_2O$  as eluent. The fractions containing product were concentrated *in vacuo*. The residue was eluted through Sephadex LH-20 column ( $H_2O$ ) to provide **1** (52.2 mg, 98%) as a slightly orange solid.  $[\alpha]_D^{25} = -76.9$  ( $c$  0.20,  $H_2O$ );  $^1H$  NMR (600 MHz,  $CDCl_3$ )  $\delta$  5.12 (d,  $J = 4.2$  Hz, 1 H), 5.08 (d,  $J = 3.6$  Hz, 1 H), 4.87 (d,  $J = 1.2$  Hz, 1 H), 4.81 (d,  $J = 1.8$  Hz, 1 H), 4.61–4.59 (m, 2 H), 4.55 (d,  $J = 3.6$  Hz, 1 H), 4.51 (d,  $J = 3.6$  Hz, 1 H), 4.29 (t,  $J = 2.4$  Hz, 1 H), 4.25 (t,  $J = 3.0$  Hz, 1 H), 4.10–4.05 (m, 1 H), 4.00 (t,  $J = 3.6$  Hz, 1 H), 3.95 (t-like,  $J = 4.8$  Hz, 1 H), 3.88–3.83 (m, 3 H), 3.82–3.78 (m, 2 H), 3.75–3.69 (m, 3 H), 3.57–3.53 (m, 1 H), 3.02 (t,  $J = 7.2$  Hz, 2 H), 1.74–1.62 (m, 2 H), 1.55–1.42 (m, 2 H), 1.27 (d,  $J = 6.0$  Hz, 3 H), 1.26 (d,  $J = 6.0$  Hz, 3 H);  $^{13}C$  NMR (150 MHz,  $D_2O$ )  $\delta$  175.7, 174.6, 103.0, 102.7, 101.2, 99.3, 79.0, 78.8, 76.5, 76.1, 71.4, 71.3, 71.2, 70.9, 70.7, 70.3, 69.9, 68.8, 68.7, 67.8, 67.6, 67.4, 39.4, 28.0, 26.6, 22.6, 16.9, 16.8; HRMS (ESI)  $m/z$  calcd for  $C_{29}H_{48}O_{27}NS_2$  [ $M - H$ ]<sup>-</sup> 906.1855, found 906.1810.

### **3. Materials and method biology**

#### **3.1 Reagents**

Neutral red was purchased from J&K scientific. LPS was purchased from Sigma.

#### **3.2 Cell culture**

The murine macrophage RAW264.7 cell line was purchased from the Cell Bank of the Chinese Academy of Sciences (Shanghai, China) and cultured in DMEM (Gibco, USA) supplemented with 10% fetal bovine serum (FBS, Gibco) at 37 °C in a moisturized atmosphere of 5% CO<sub>2</sub> and 95% air.

#### **3.3 Cell viability analysis**

The effect of the sulfated tetrasaccharide **1** on the viability of RAW264.7 cells was measured by MTT (3-(4,5-dimethyl-2-thiazolyl)-2,5-diphenyl-2H-tetrazolium bromide) assays. RAW264.7 cells were seeded in 96-well plates for 12 h, and then treated with tetrasaccharide **1** (0, 18.75, 37.5, 75, 150, 300 µg/mL) for an additional 24 h. Next, the medium containing **1** was removed, and fresh medium containing MTT (200 µL per well) was added. After 4 h, the formazan crystals were dissolved in 100 µL DMSO and the optical density at 540 nm was measured by multi-mode microplate reader (BioTek's Synergy Neo2). The cell viability was analyzed by this equation: Cell Viability (%) = [OD (Samples)-OD (Blank)]/OD (Control)-OD (Blank)]\*100%.

#### **3.4 Phagocytosis assay**

The phagocytic ability of RAW264.7 cells was evaluated by neutral red uptake assay. RAW264.7 cells were seeded in a 96-well plate and incubated at 37 °C for 12 h. After cells were incubated with the sulfated tetrasaccharide **1** (0, 37.5, 75, 150, 300 µg/mL) or LPS (1 µg/mL) for 24 h, 100 µL of neutral red solution (0.075%) was added into wells and incubated for 4 min. Next, these cells were washed with PBS twice and lysed by cell lysates (ethanol and acetic acid at the ratio of 1:1, 100 µL/well) at room temperature for 2 h. The optical density at 540 nm was measured by multi-mode microplate reader (BioTek's Synergy Neo2).

#### **3.5 Statistical analysis**

Statistical analysis was performed with Graphpad Prism 8.0.1 software. Experimental results were expressed by the mean  $\pm$  standard deviation (SD) of three independent experiments. The data were statistically analyzed by Student's t test to detect significant difference between two groups. The p-value less than 0.05 was considered significant.

#### 4. References

1. Q. Liu, P. Wang, L. Zhang, T. Guo, G. Lv and Y. Li, *Carbohydr. Res.* 2009, **344**, 1276–1281.
2. (a) X. Dai, W. Liu, Q. Zhou, C. Cheng, C. Yang, S. Wang, M. Zhang, P. Tang, H. Song, D. Zhang and Y. Qin, *J. Org. Chem.* 2016, **81**, 162–184; (b) S.-C. Hung, X.-A. Lu, J.-C. Lee, M. D.-T. Chang, S.-l. Fang, T.-c. Fan, M. M. L. Zulueta and Y.-Q. Zhong, *Org. Biomol. Chem.* 2012, **10**, 760–772; (c) J.-C. Lee, X.-A. Lu, S. S. Kulkarni, Y.-S. Wen, S.-C. Hung, *J. Am. Chem. Soc.* 2004, **126**, 476–477.
3. E. Piers, T. Wong, P. D. Coish and C. Rogers, *Can. J. Chem.* 1994, **72**, 1816–1819.
4. (a) T. K. K. Mong, M. K. Lee, S. G. Duron and C. H. Wong, *Proc. Natl. Acad. Sci. USA* 2003, **100**, 797–802; (b) C. Noti, J. L. de Paz, L. Polito and P. H. Seeberger, *Chem. Eur. J.* 2006, **12**, 8664–8686.

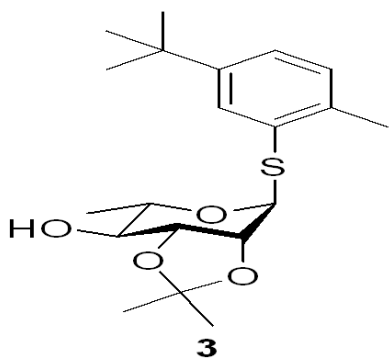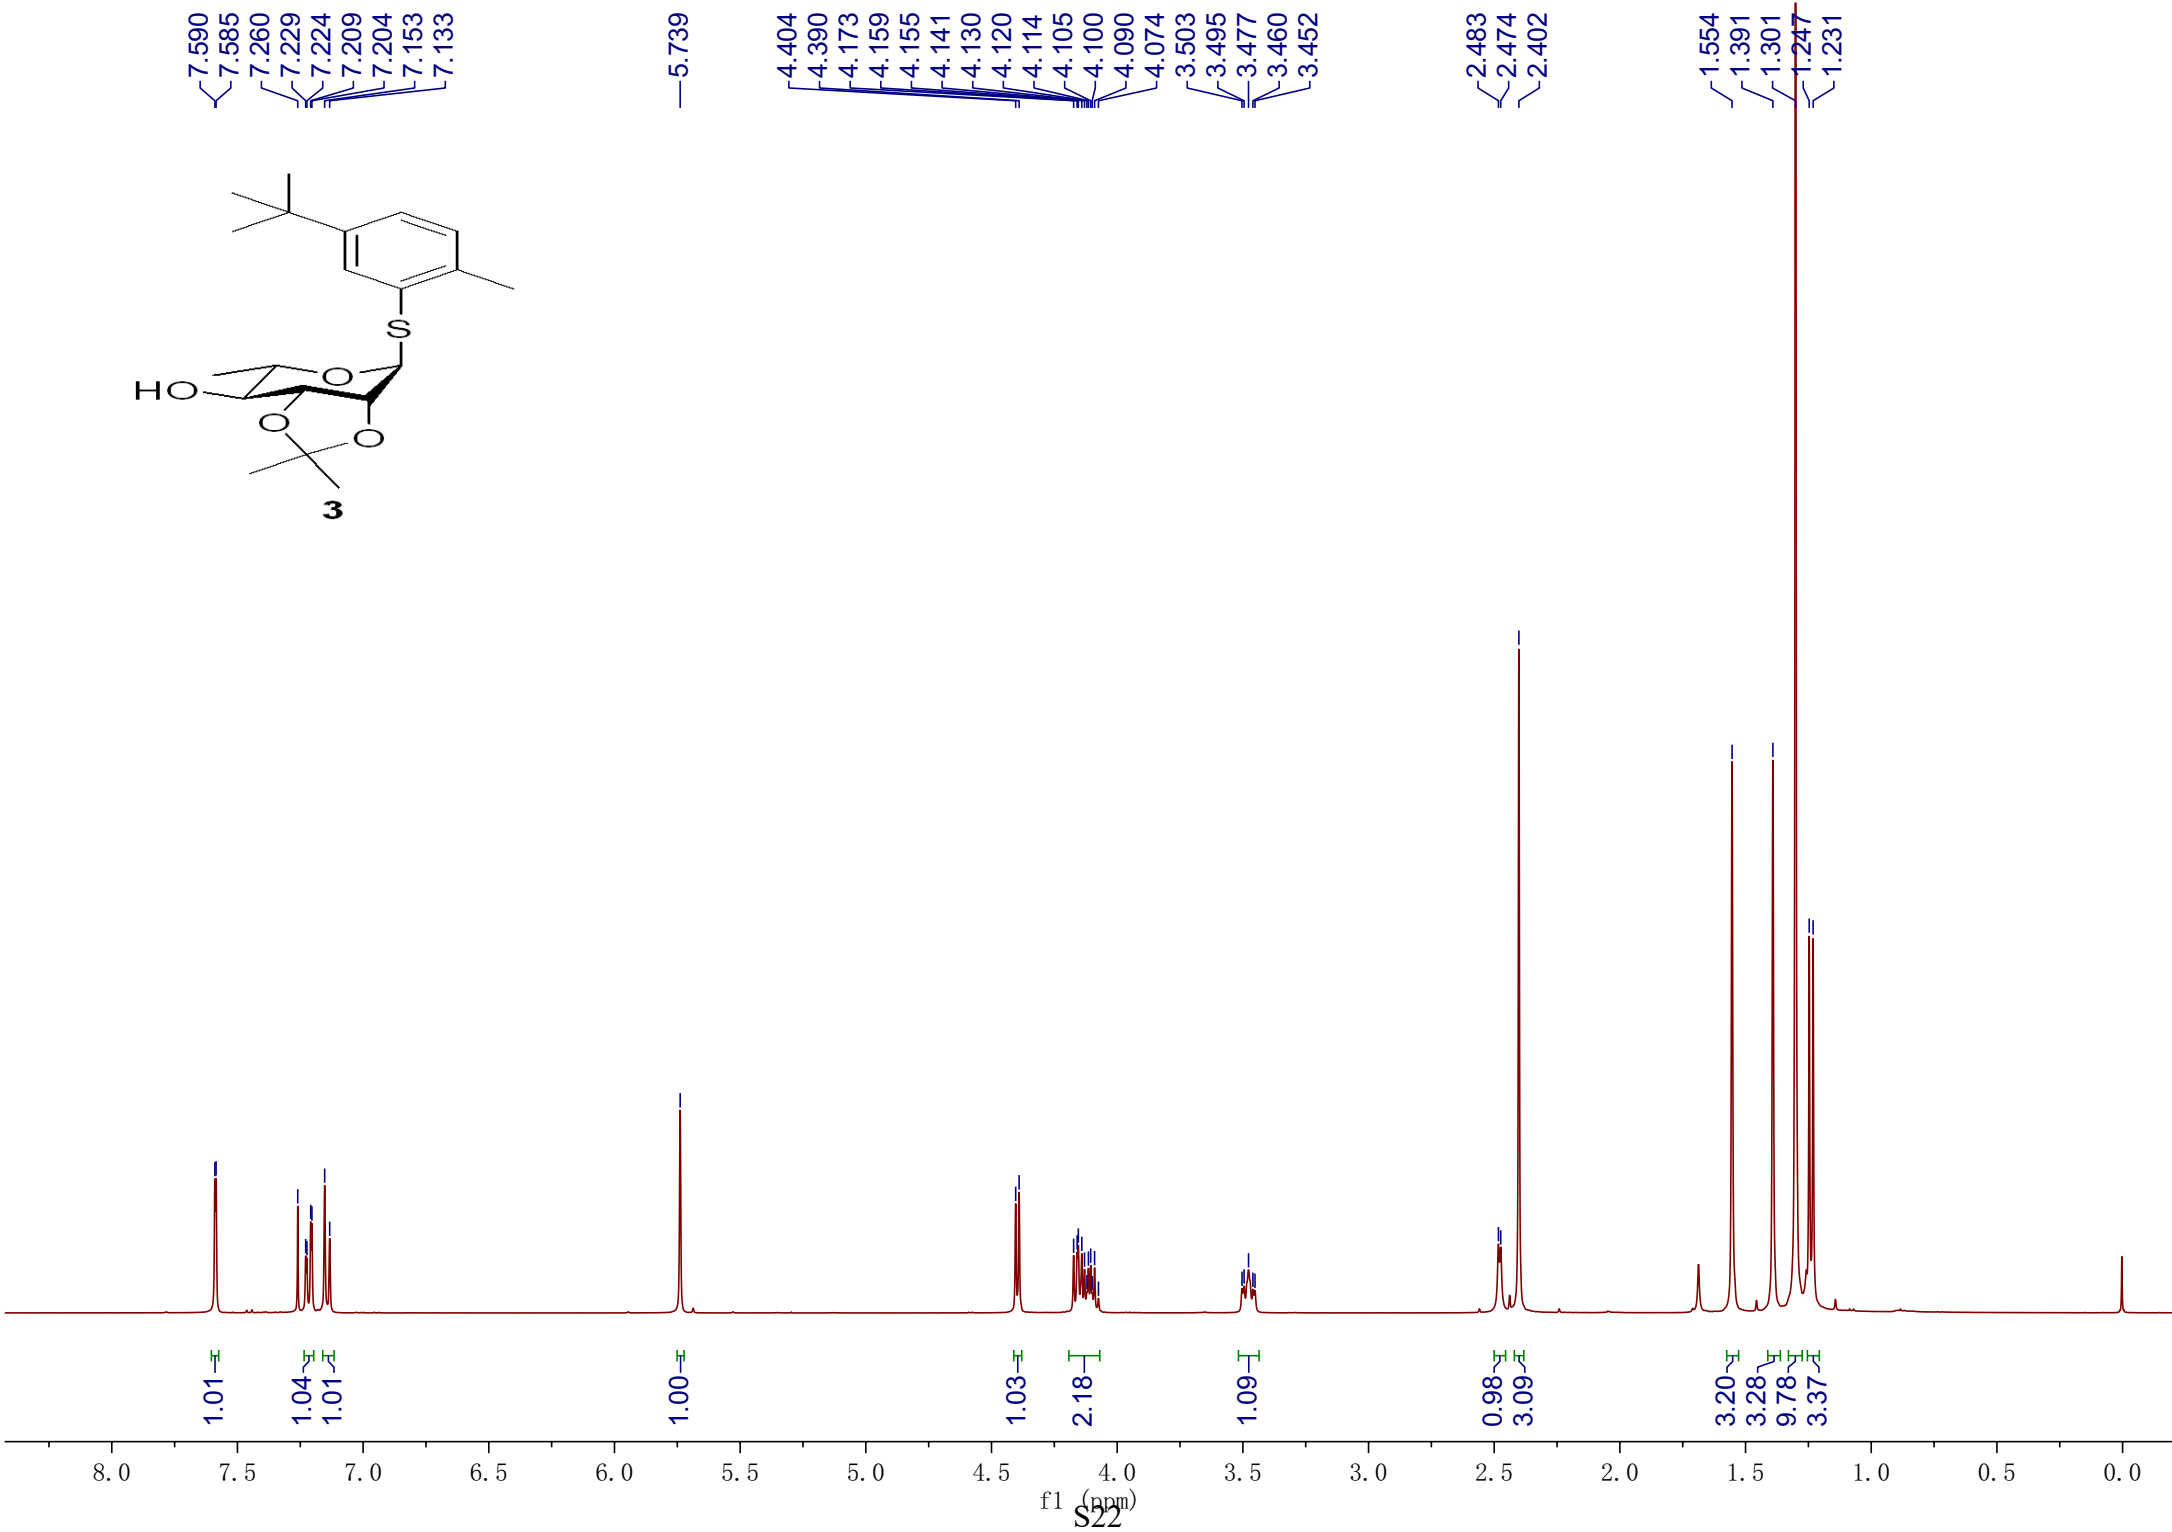

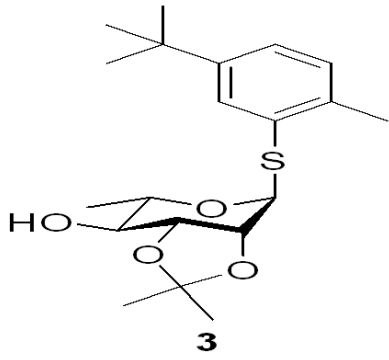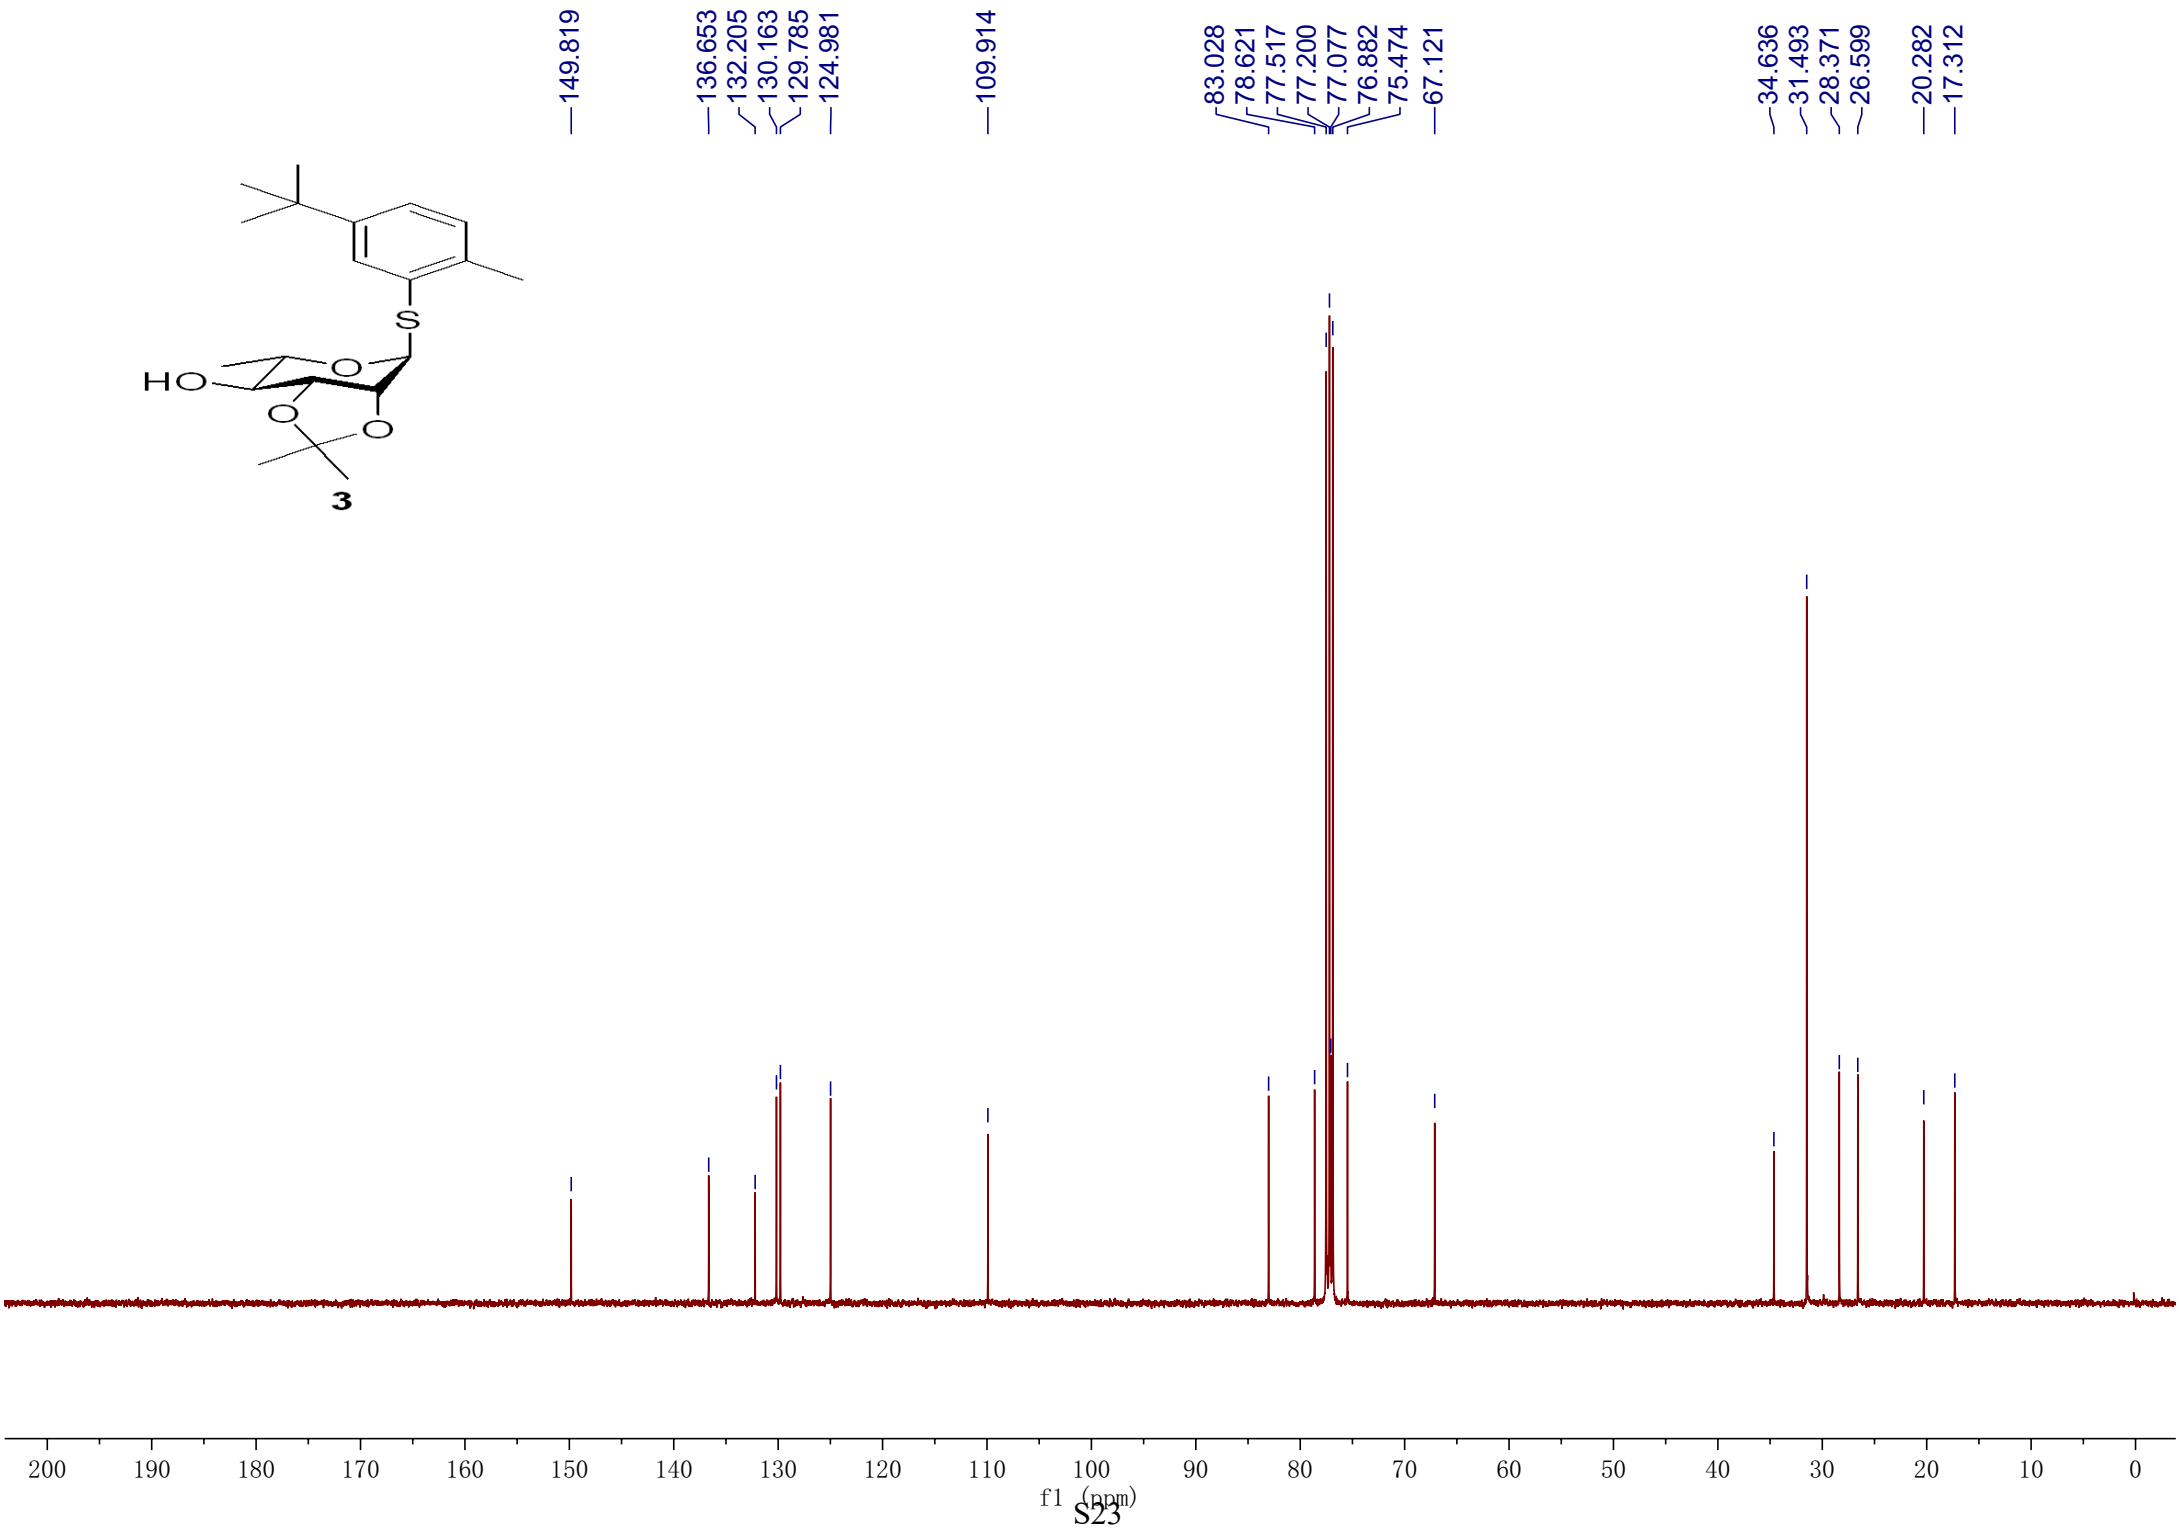

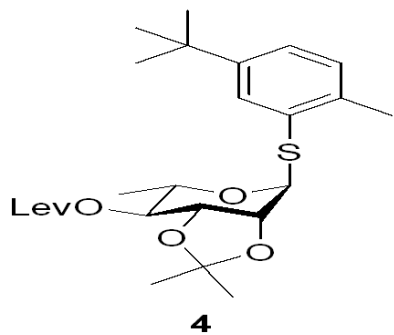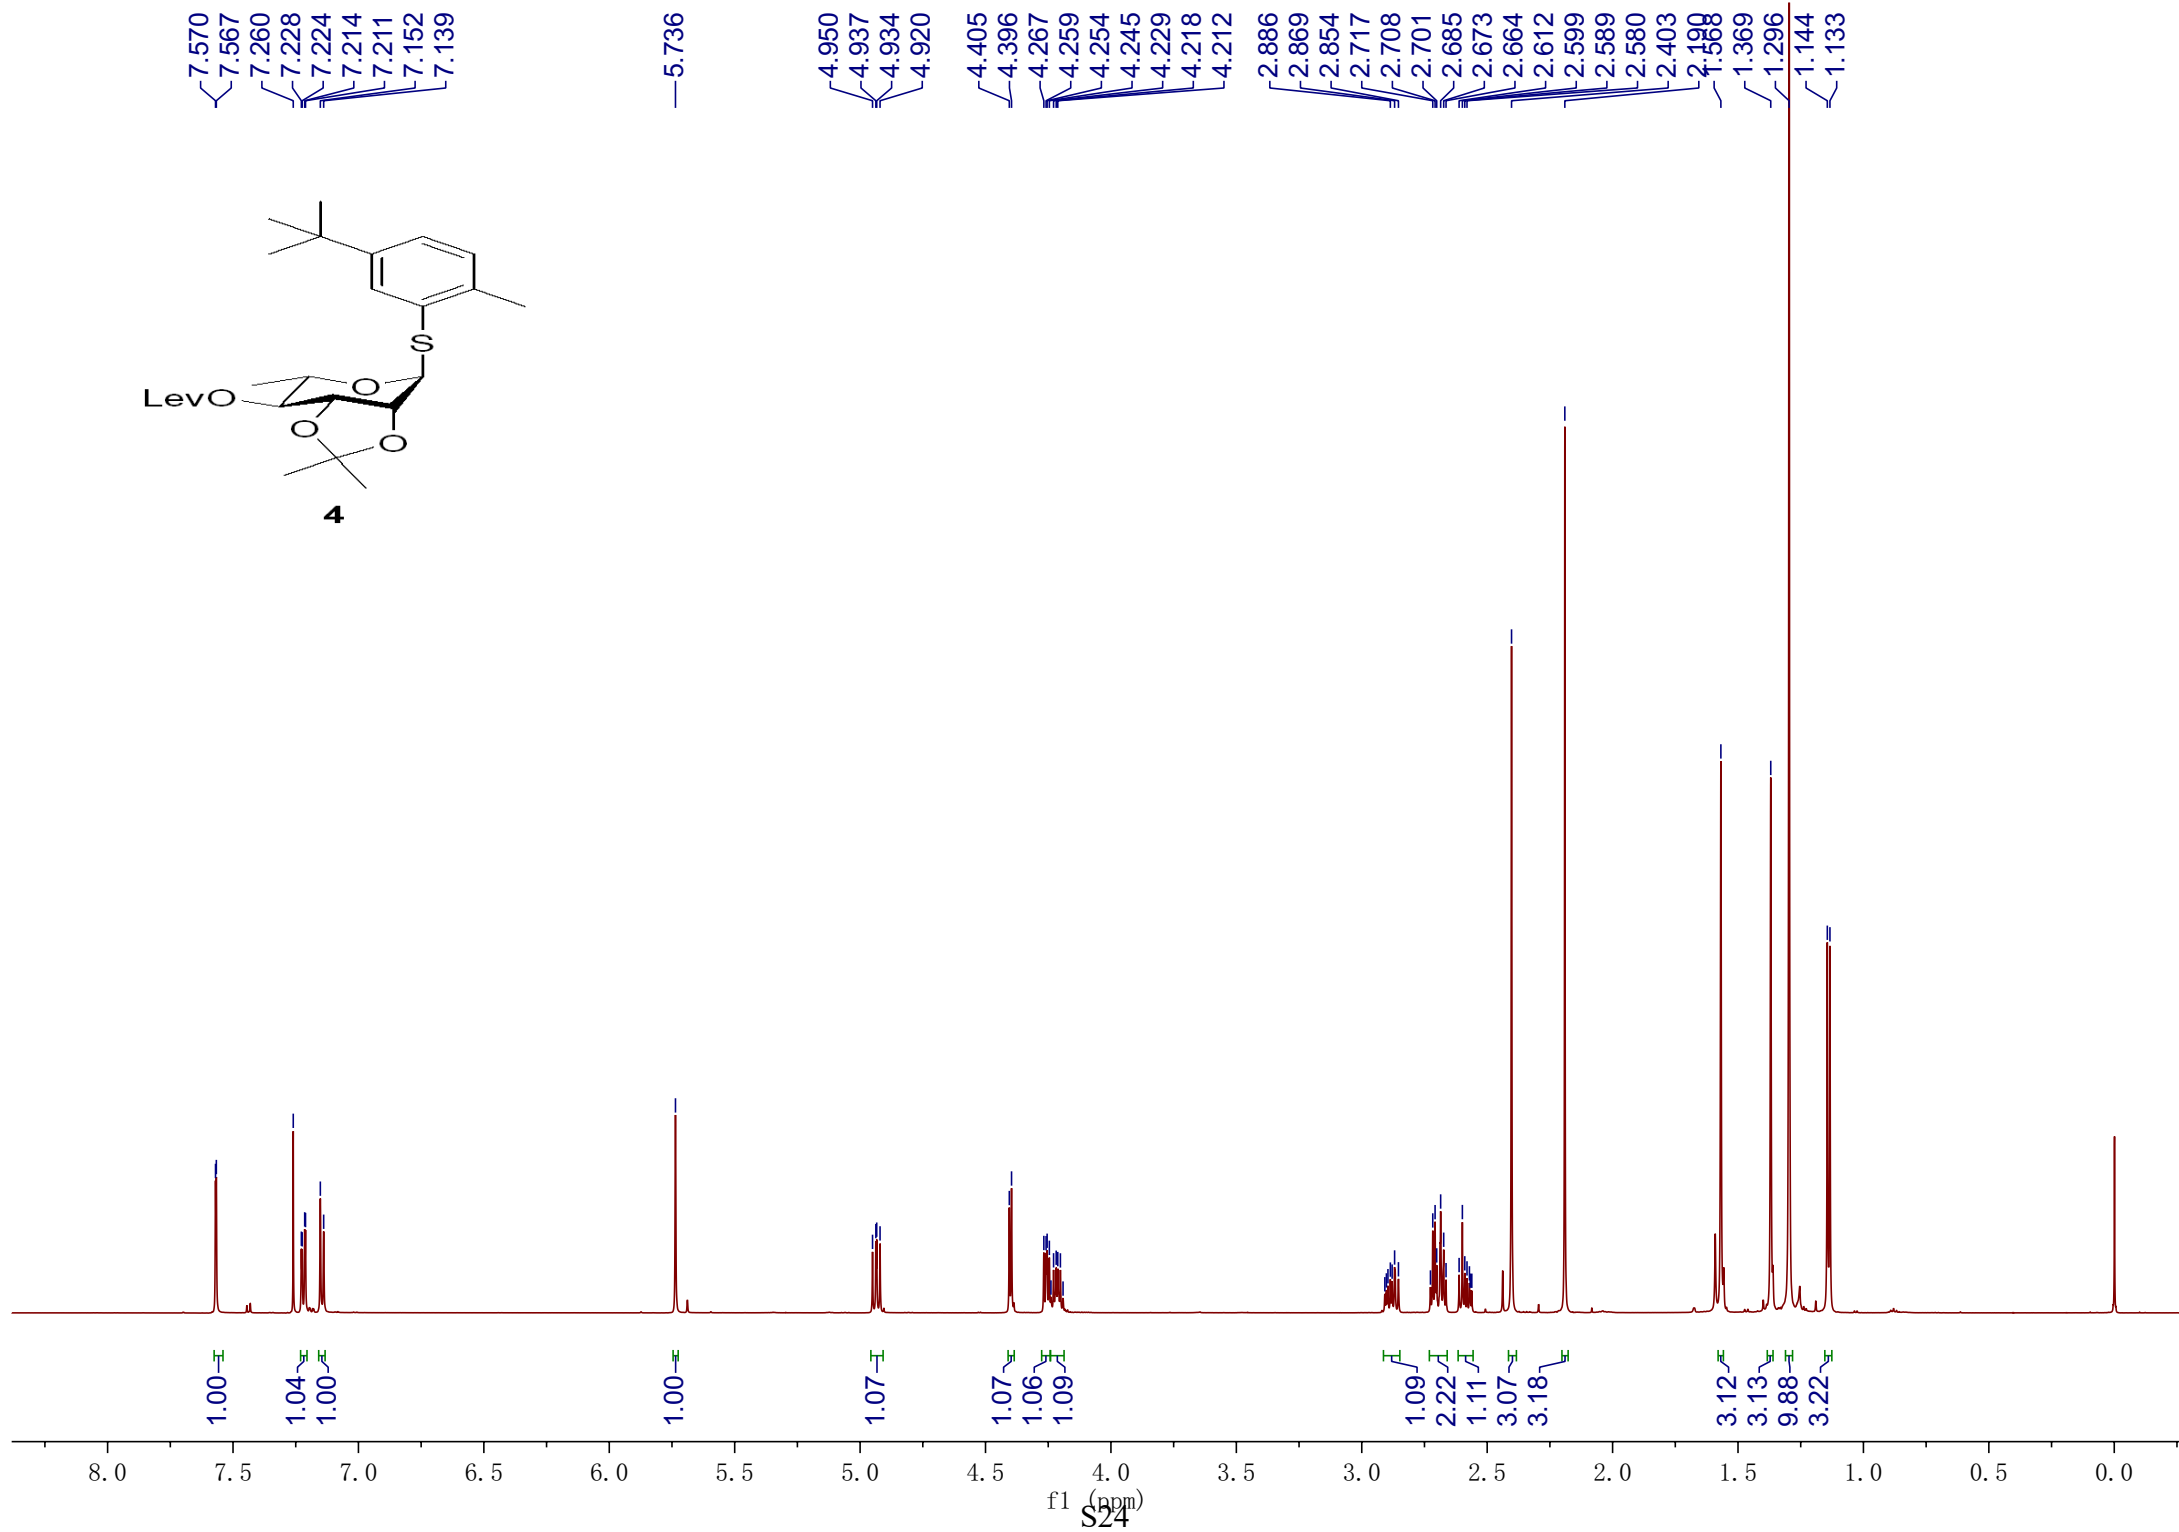



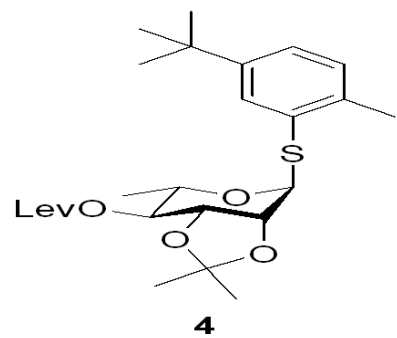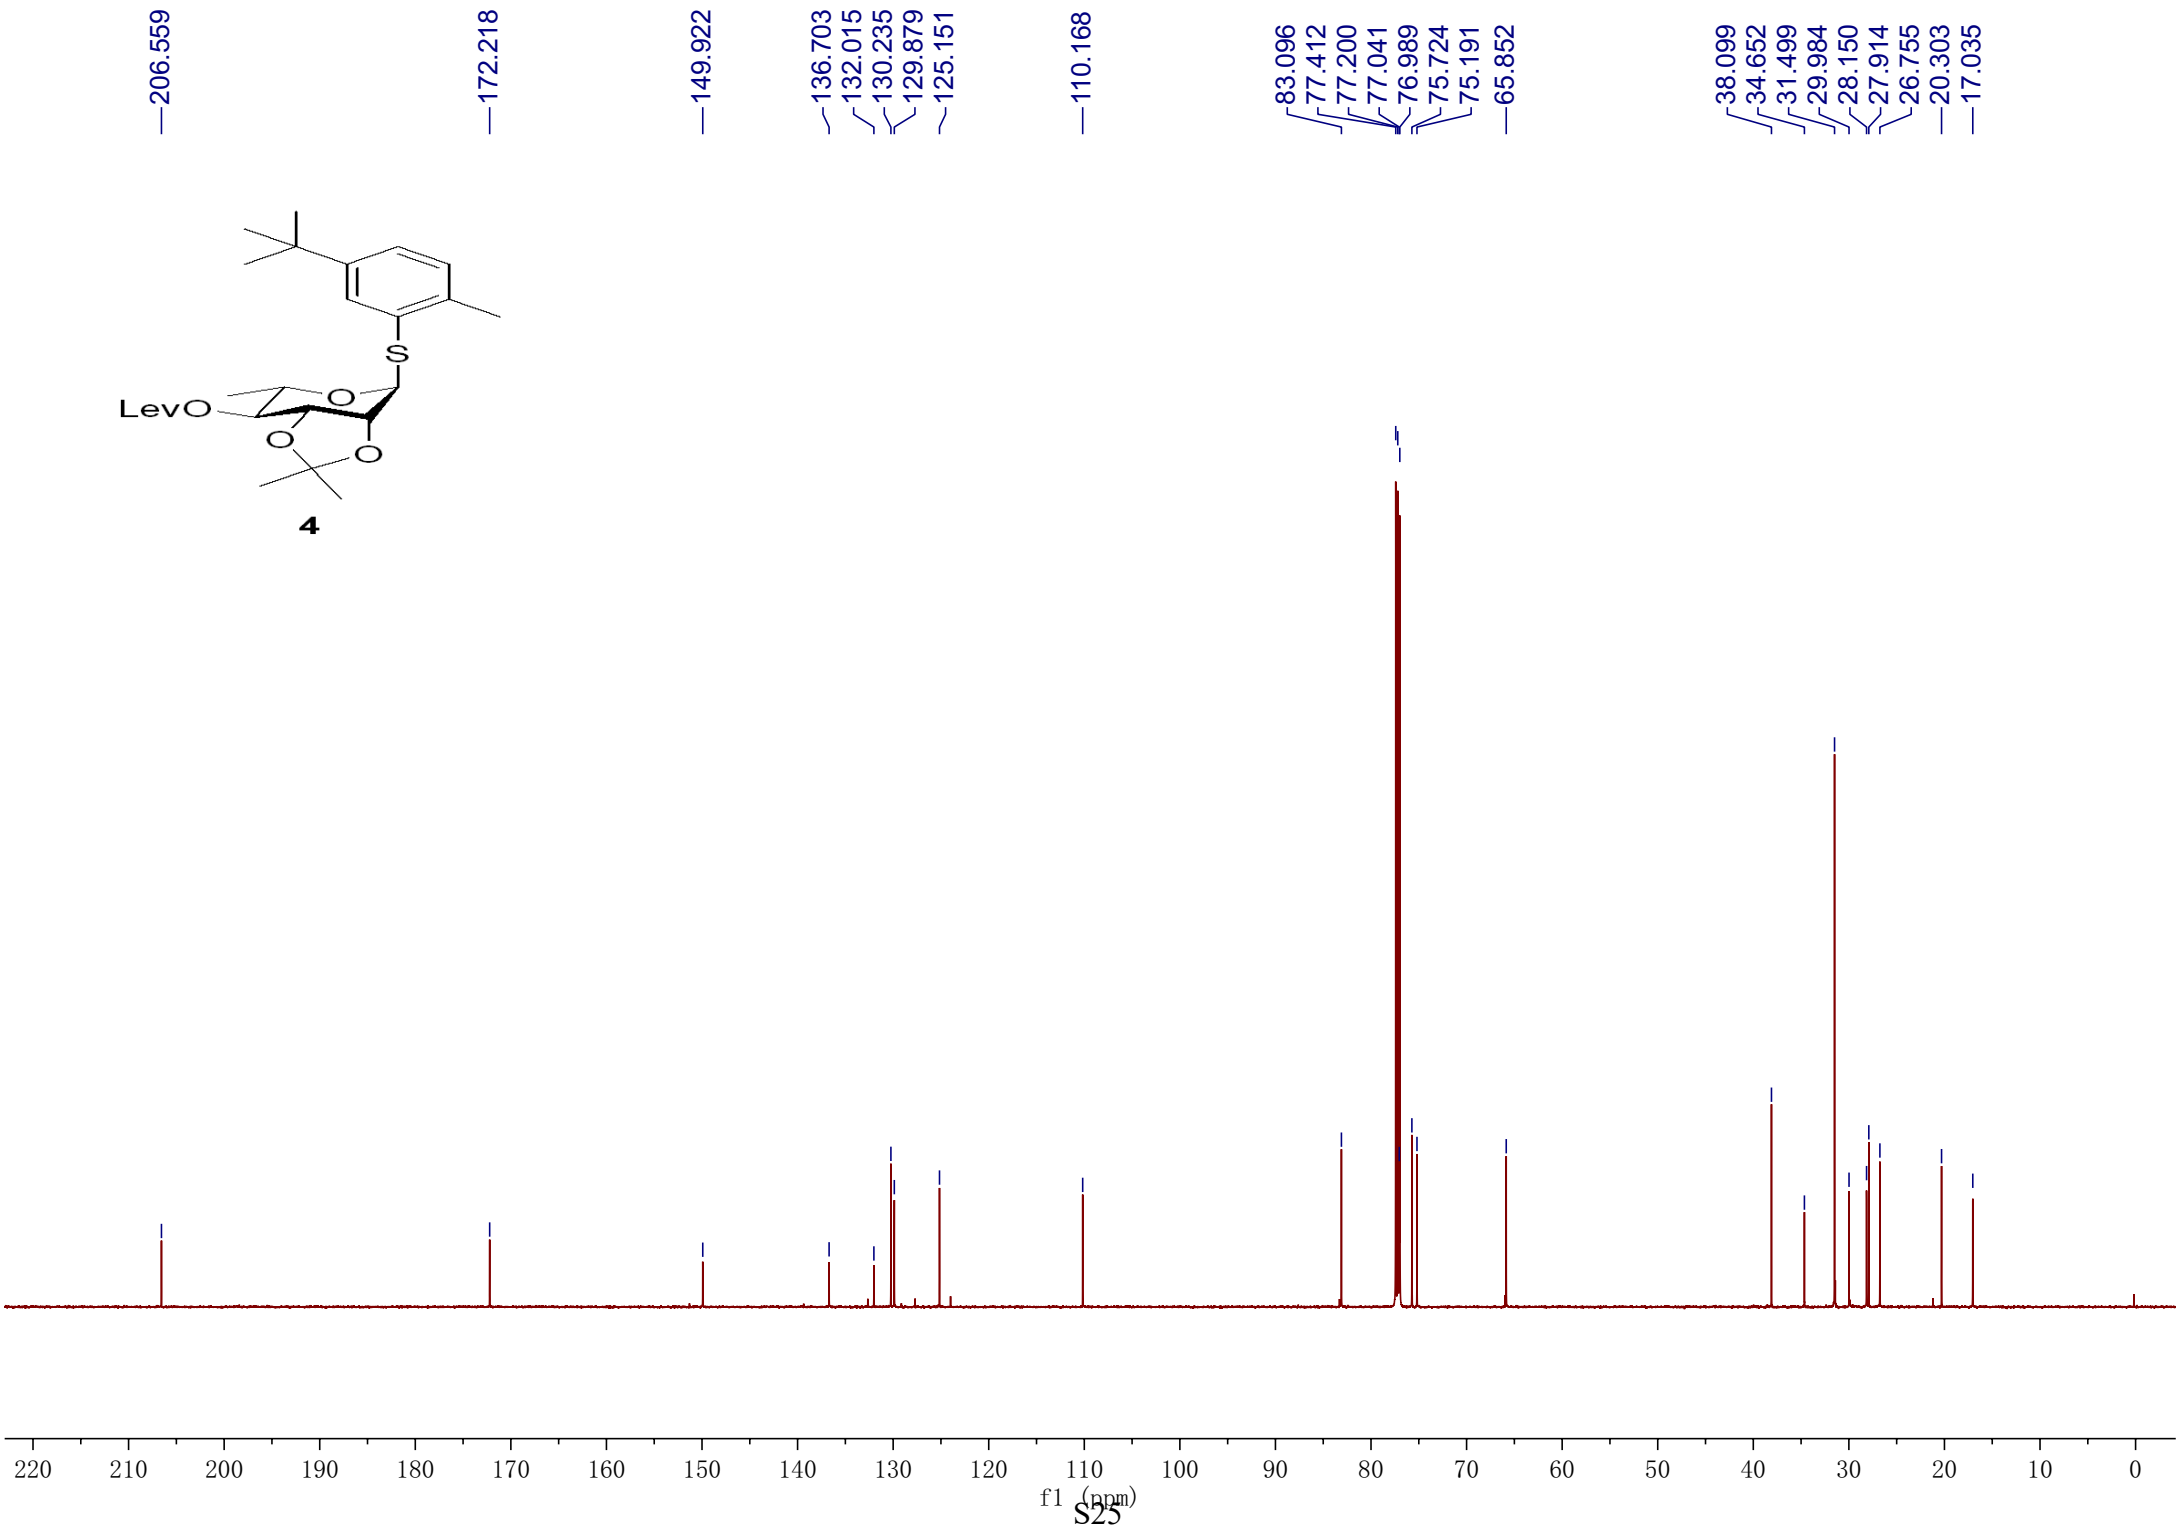

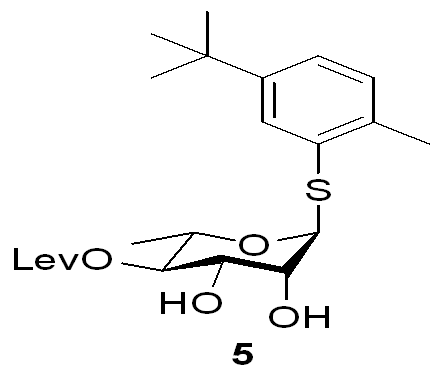

7.583  
7.580  
7.260  
7.213  
7.210  
7.200  
7.197  
7.138  
7.125

5.485  
5.483

4.988  
4.972  
4.957

4.333  
4.323  
4.317  
4.273  
4.271  
4.268  
4.266  
4.026  
4.020  
4.019  
3.472

2.863  
2.853  
2.842  
2.833  
2.647  
2.634  
2.628  
2.619  
2.616  
2.608  
2.607  
2.598  
2.588  
2.570  
2.379  
2.297  
1.237  
1.226

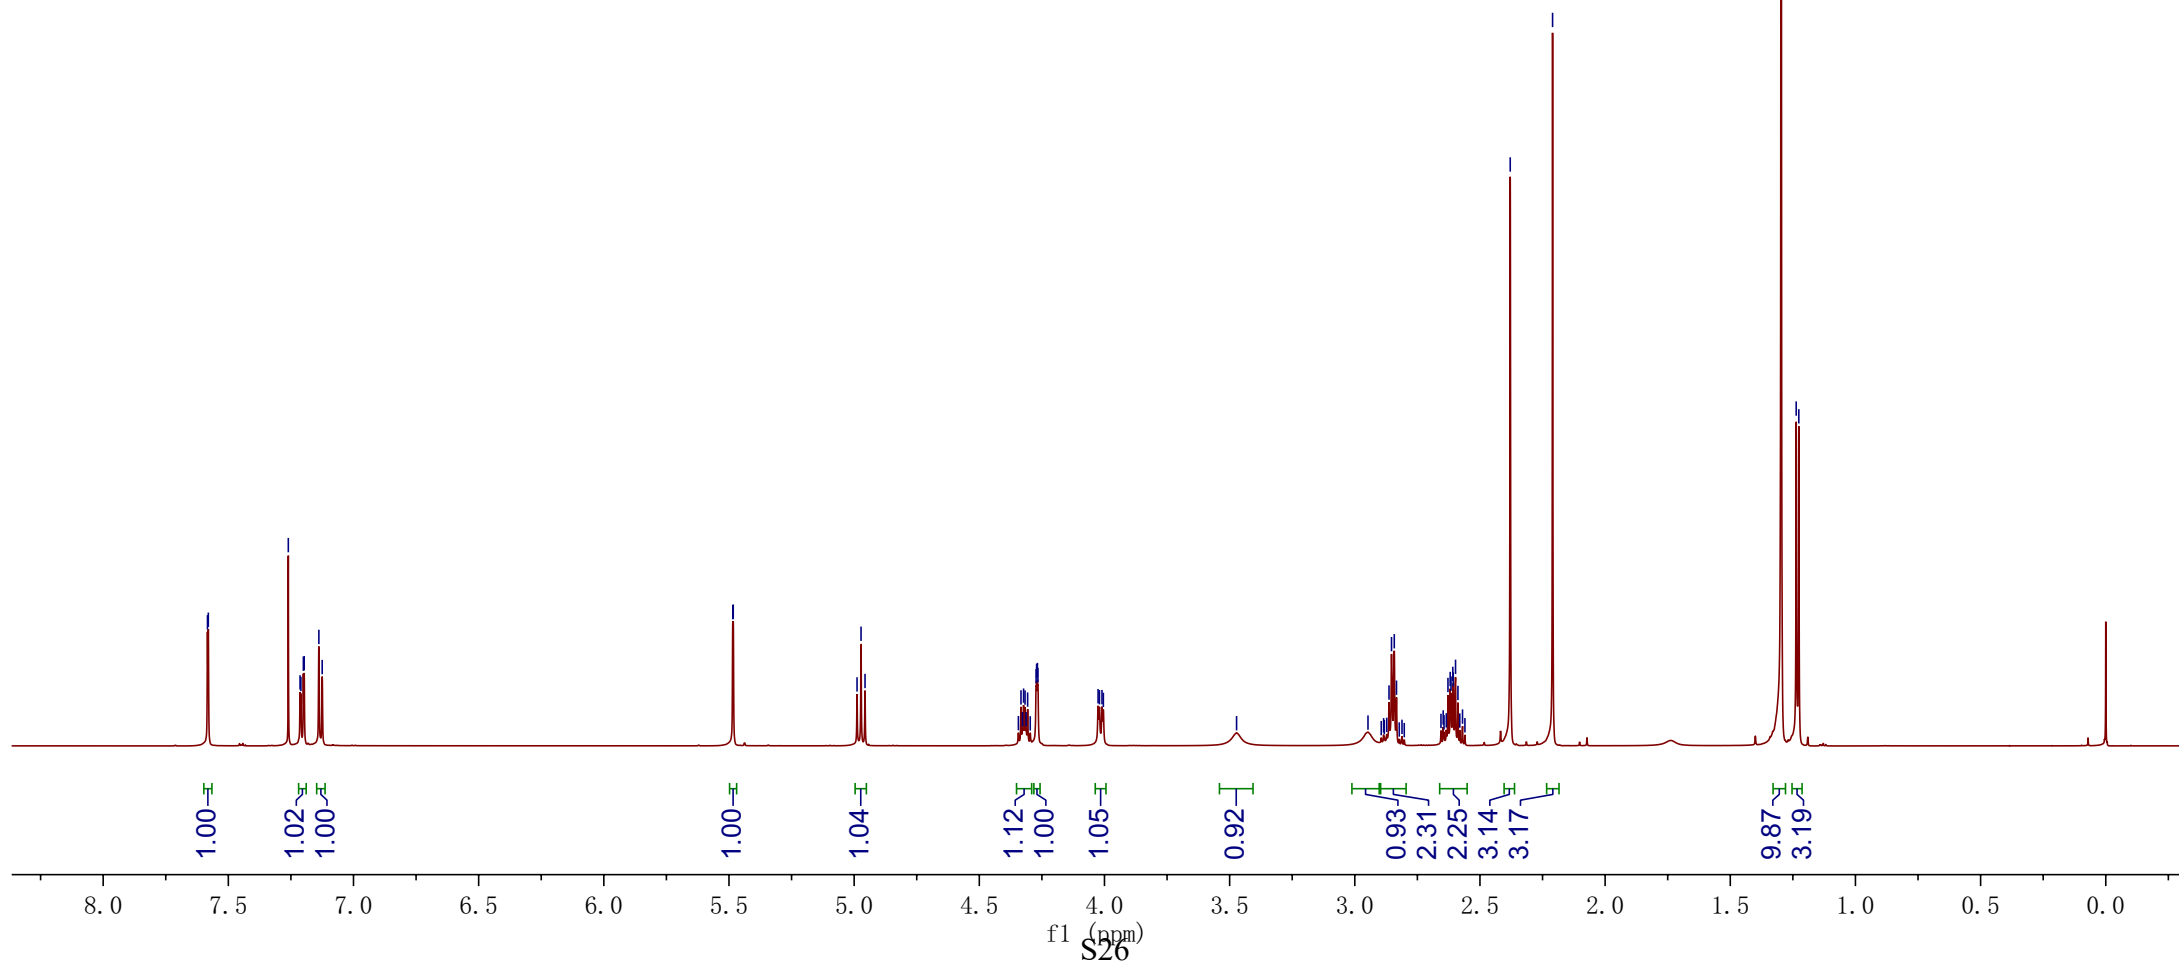

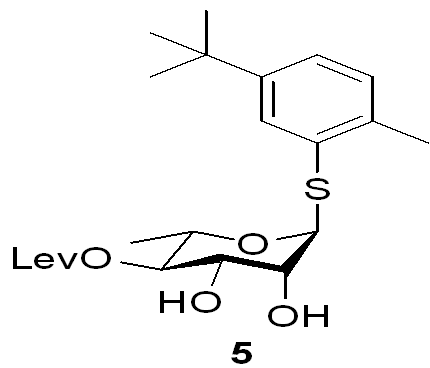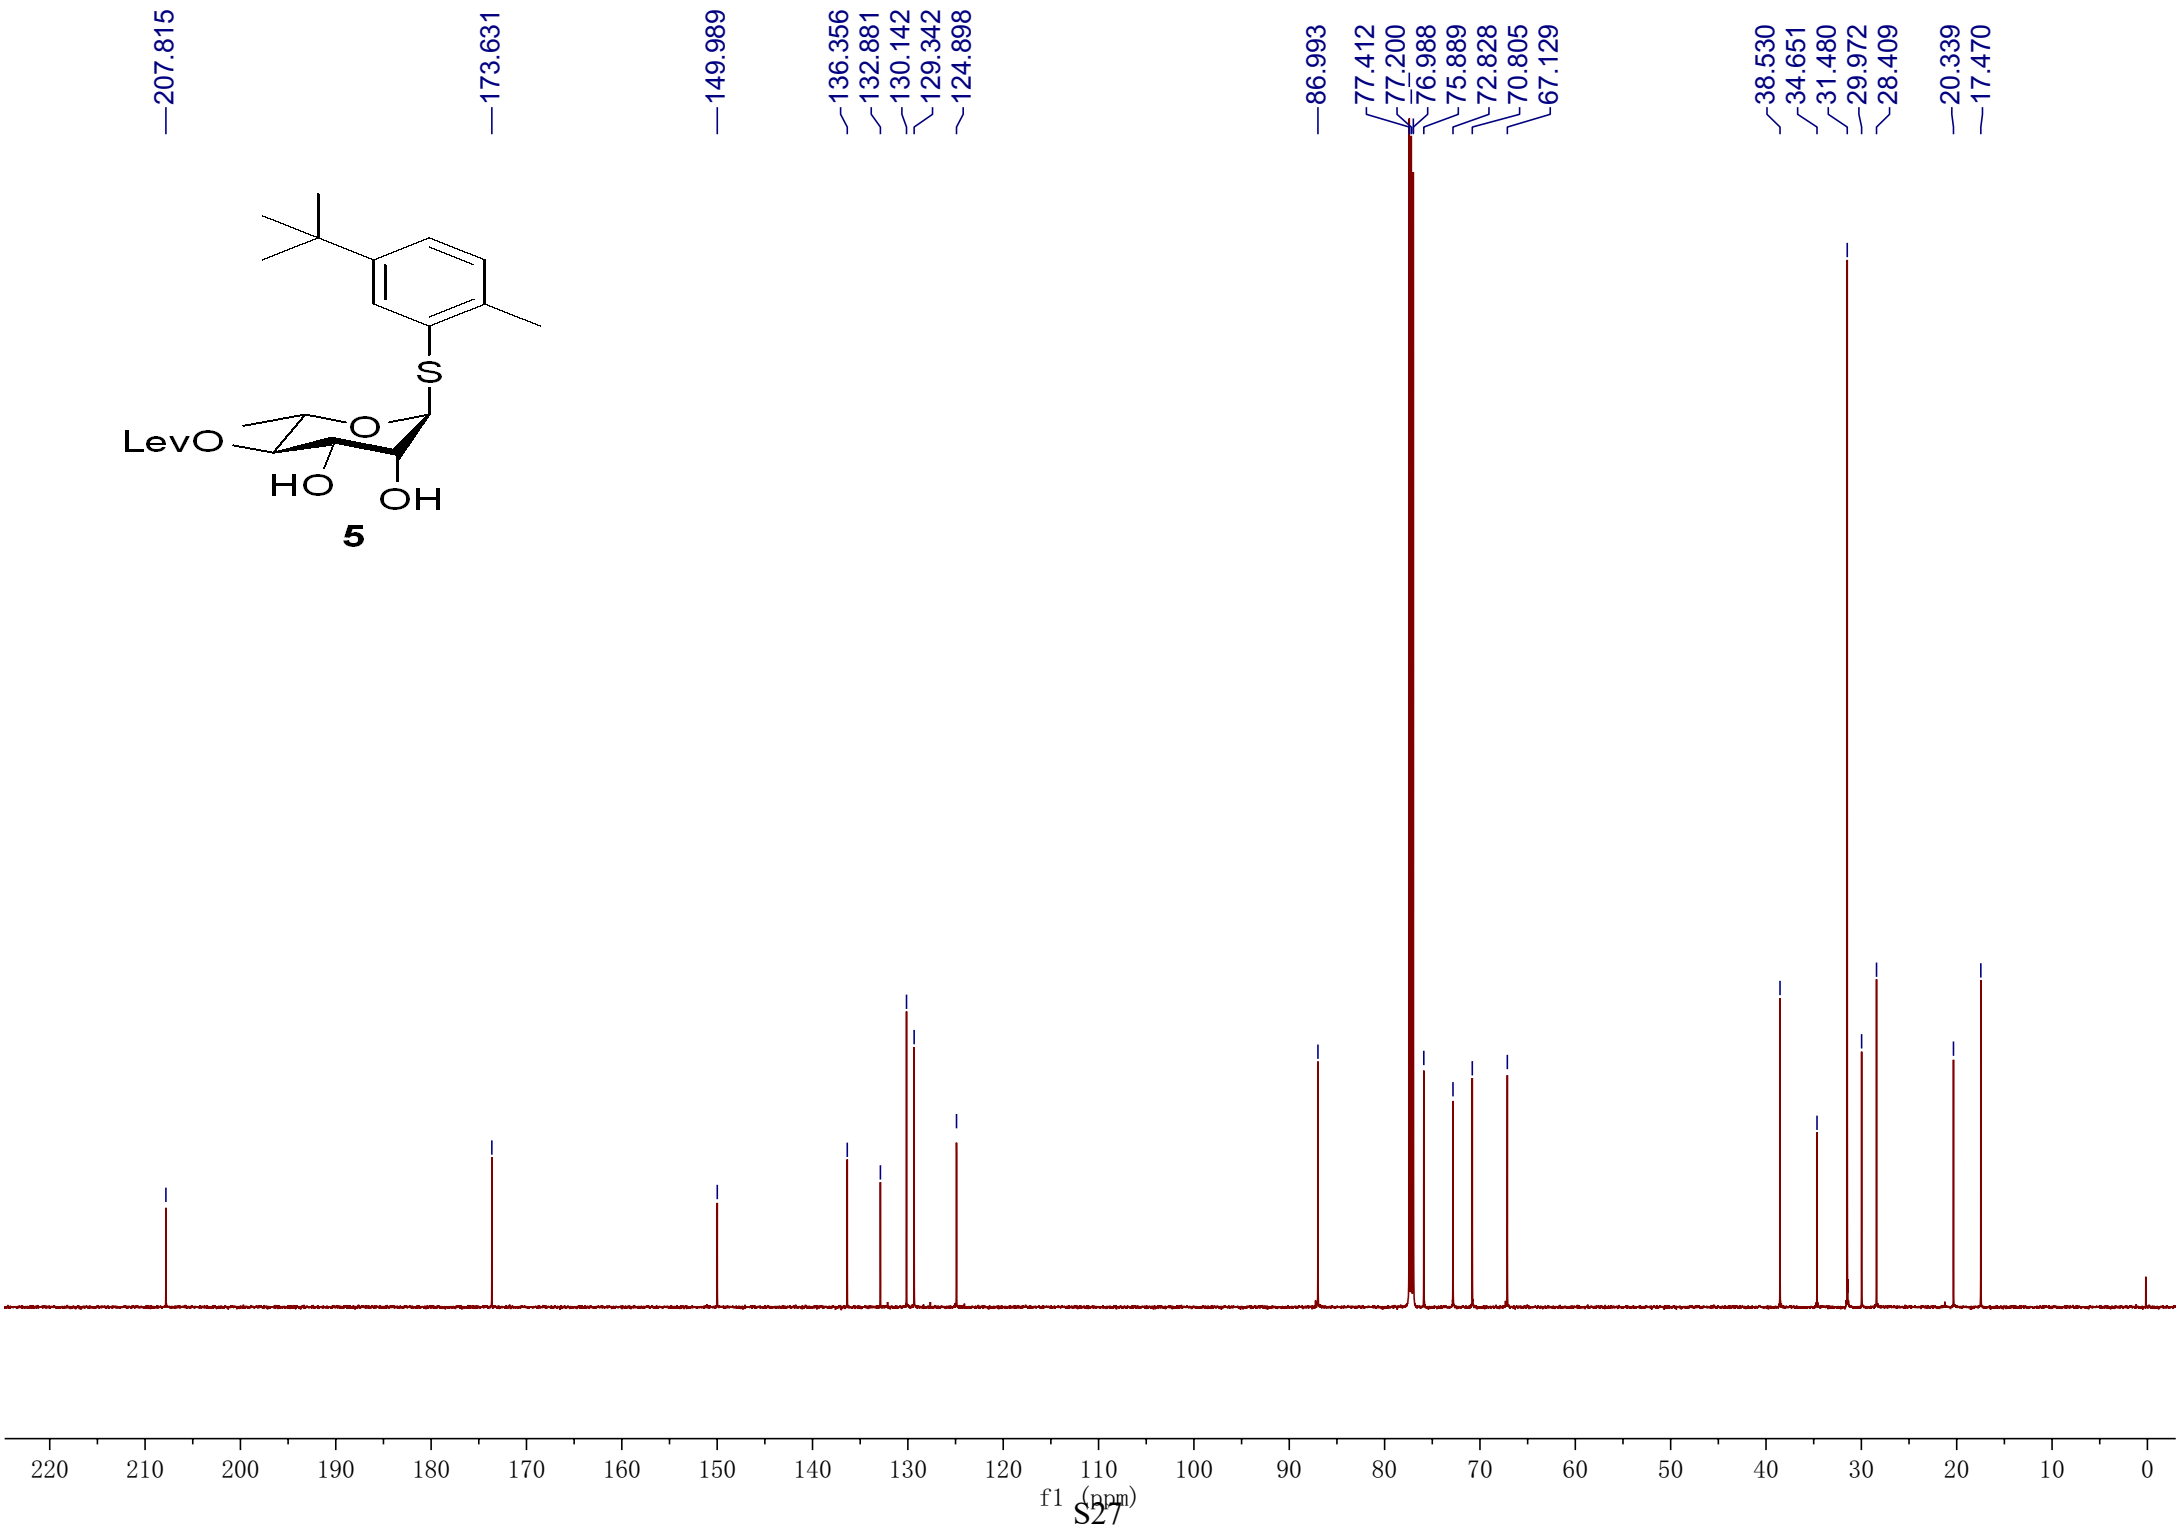

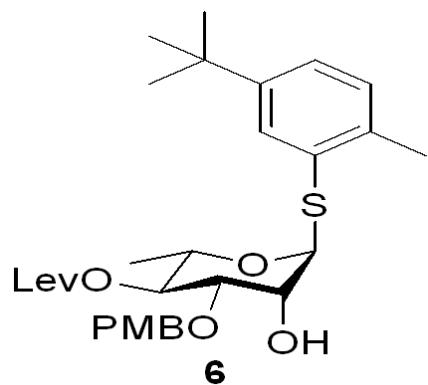

7.570  
7.566  
7.292  
7.270  
7.260  
7.216  
7.211  
7.196  
7.191  
7.139  
7.119  
6.921  
6.900

5.503  
5.500  
5.122  
5.098  
5.074  
4.640  
4.611  
4.568  
4.539  
4.252  
4.247  
4.237  
4.231  
3.800  
3.792

2.769  
2.758  
2.753  
2.743  
2.737  
2.728  
2.583  
2.572  
2.555  
2.539  
2.523  
2.513  
2.496  
2.374  
2.195

1.290  
1.198  
1.183

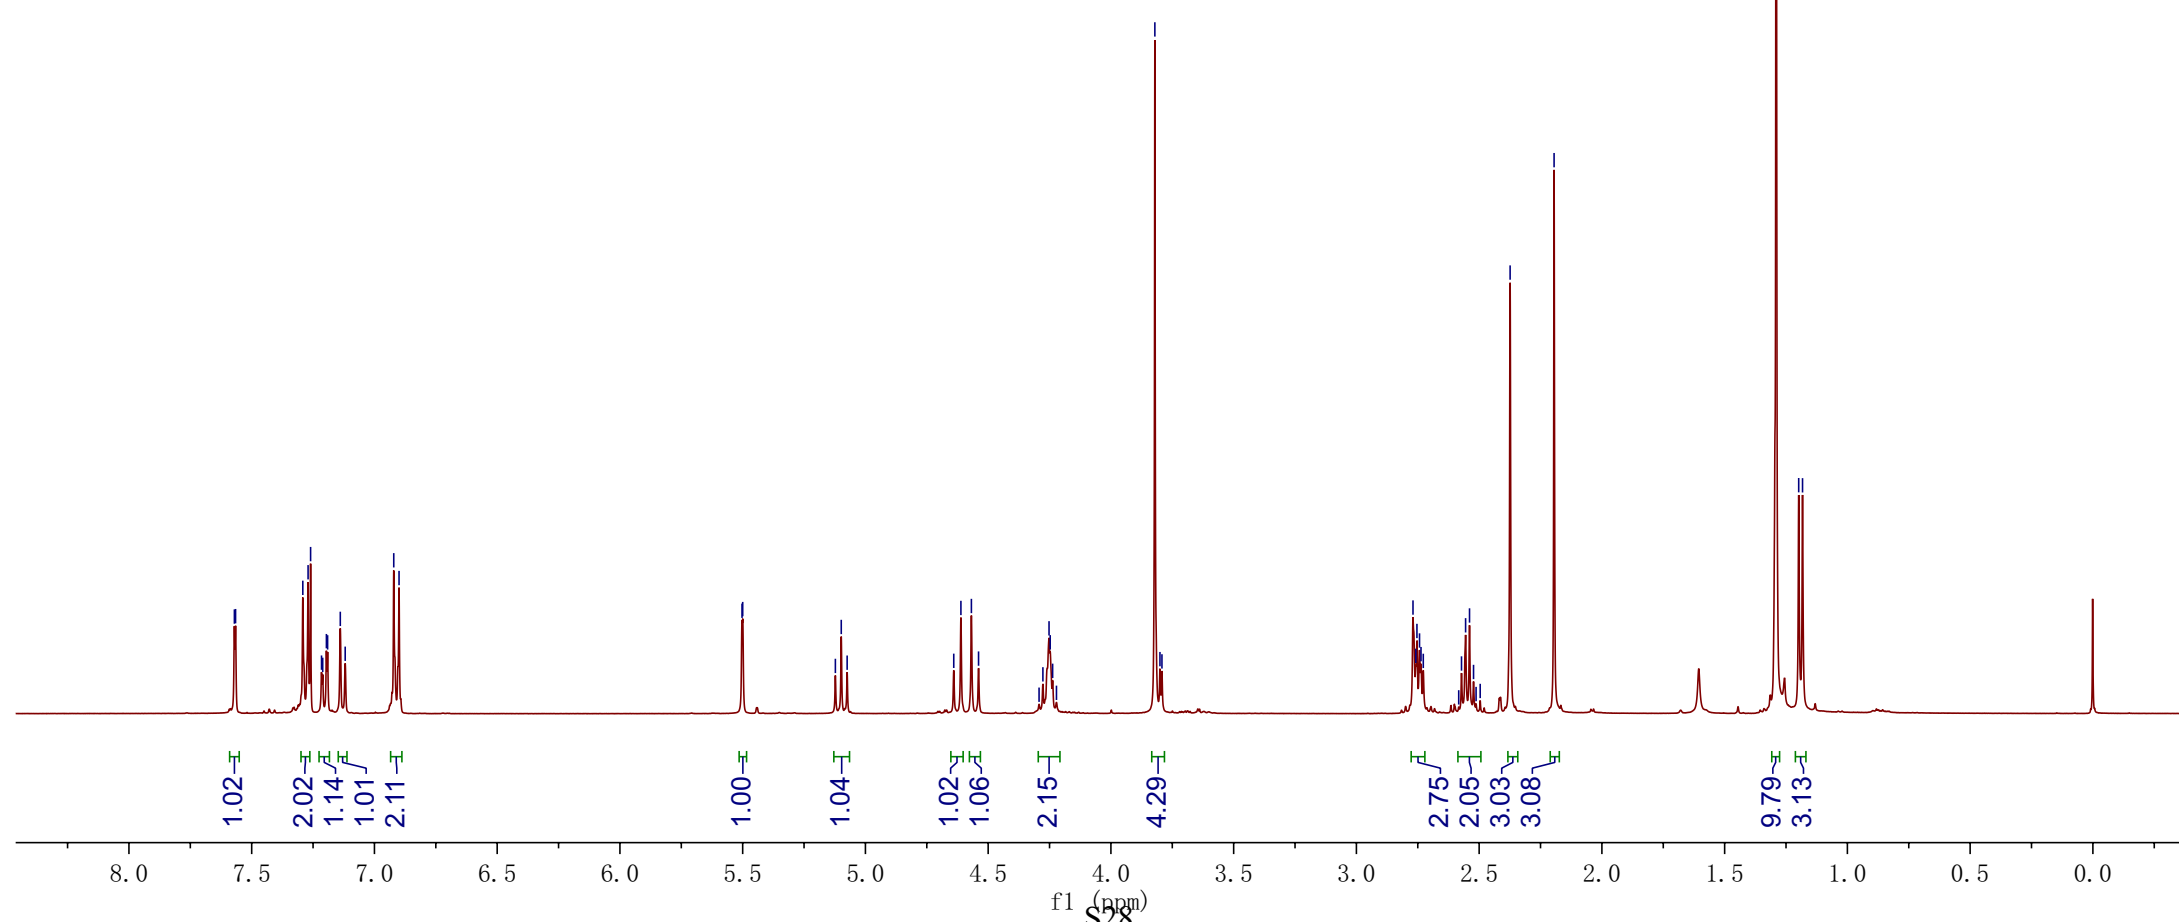

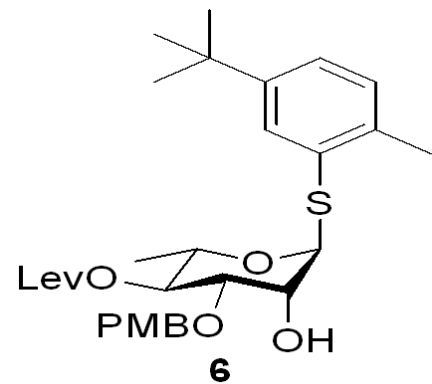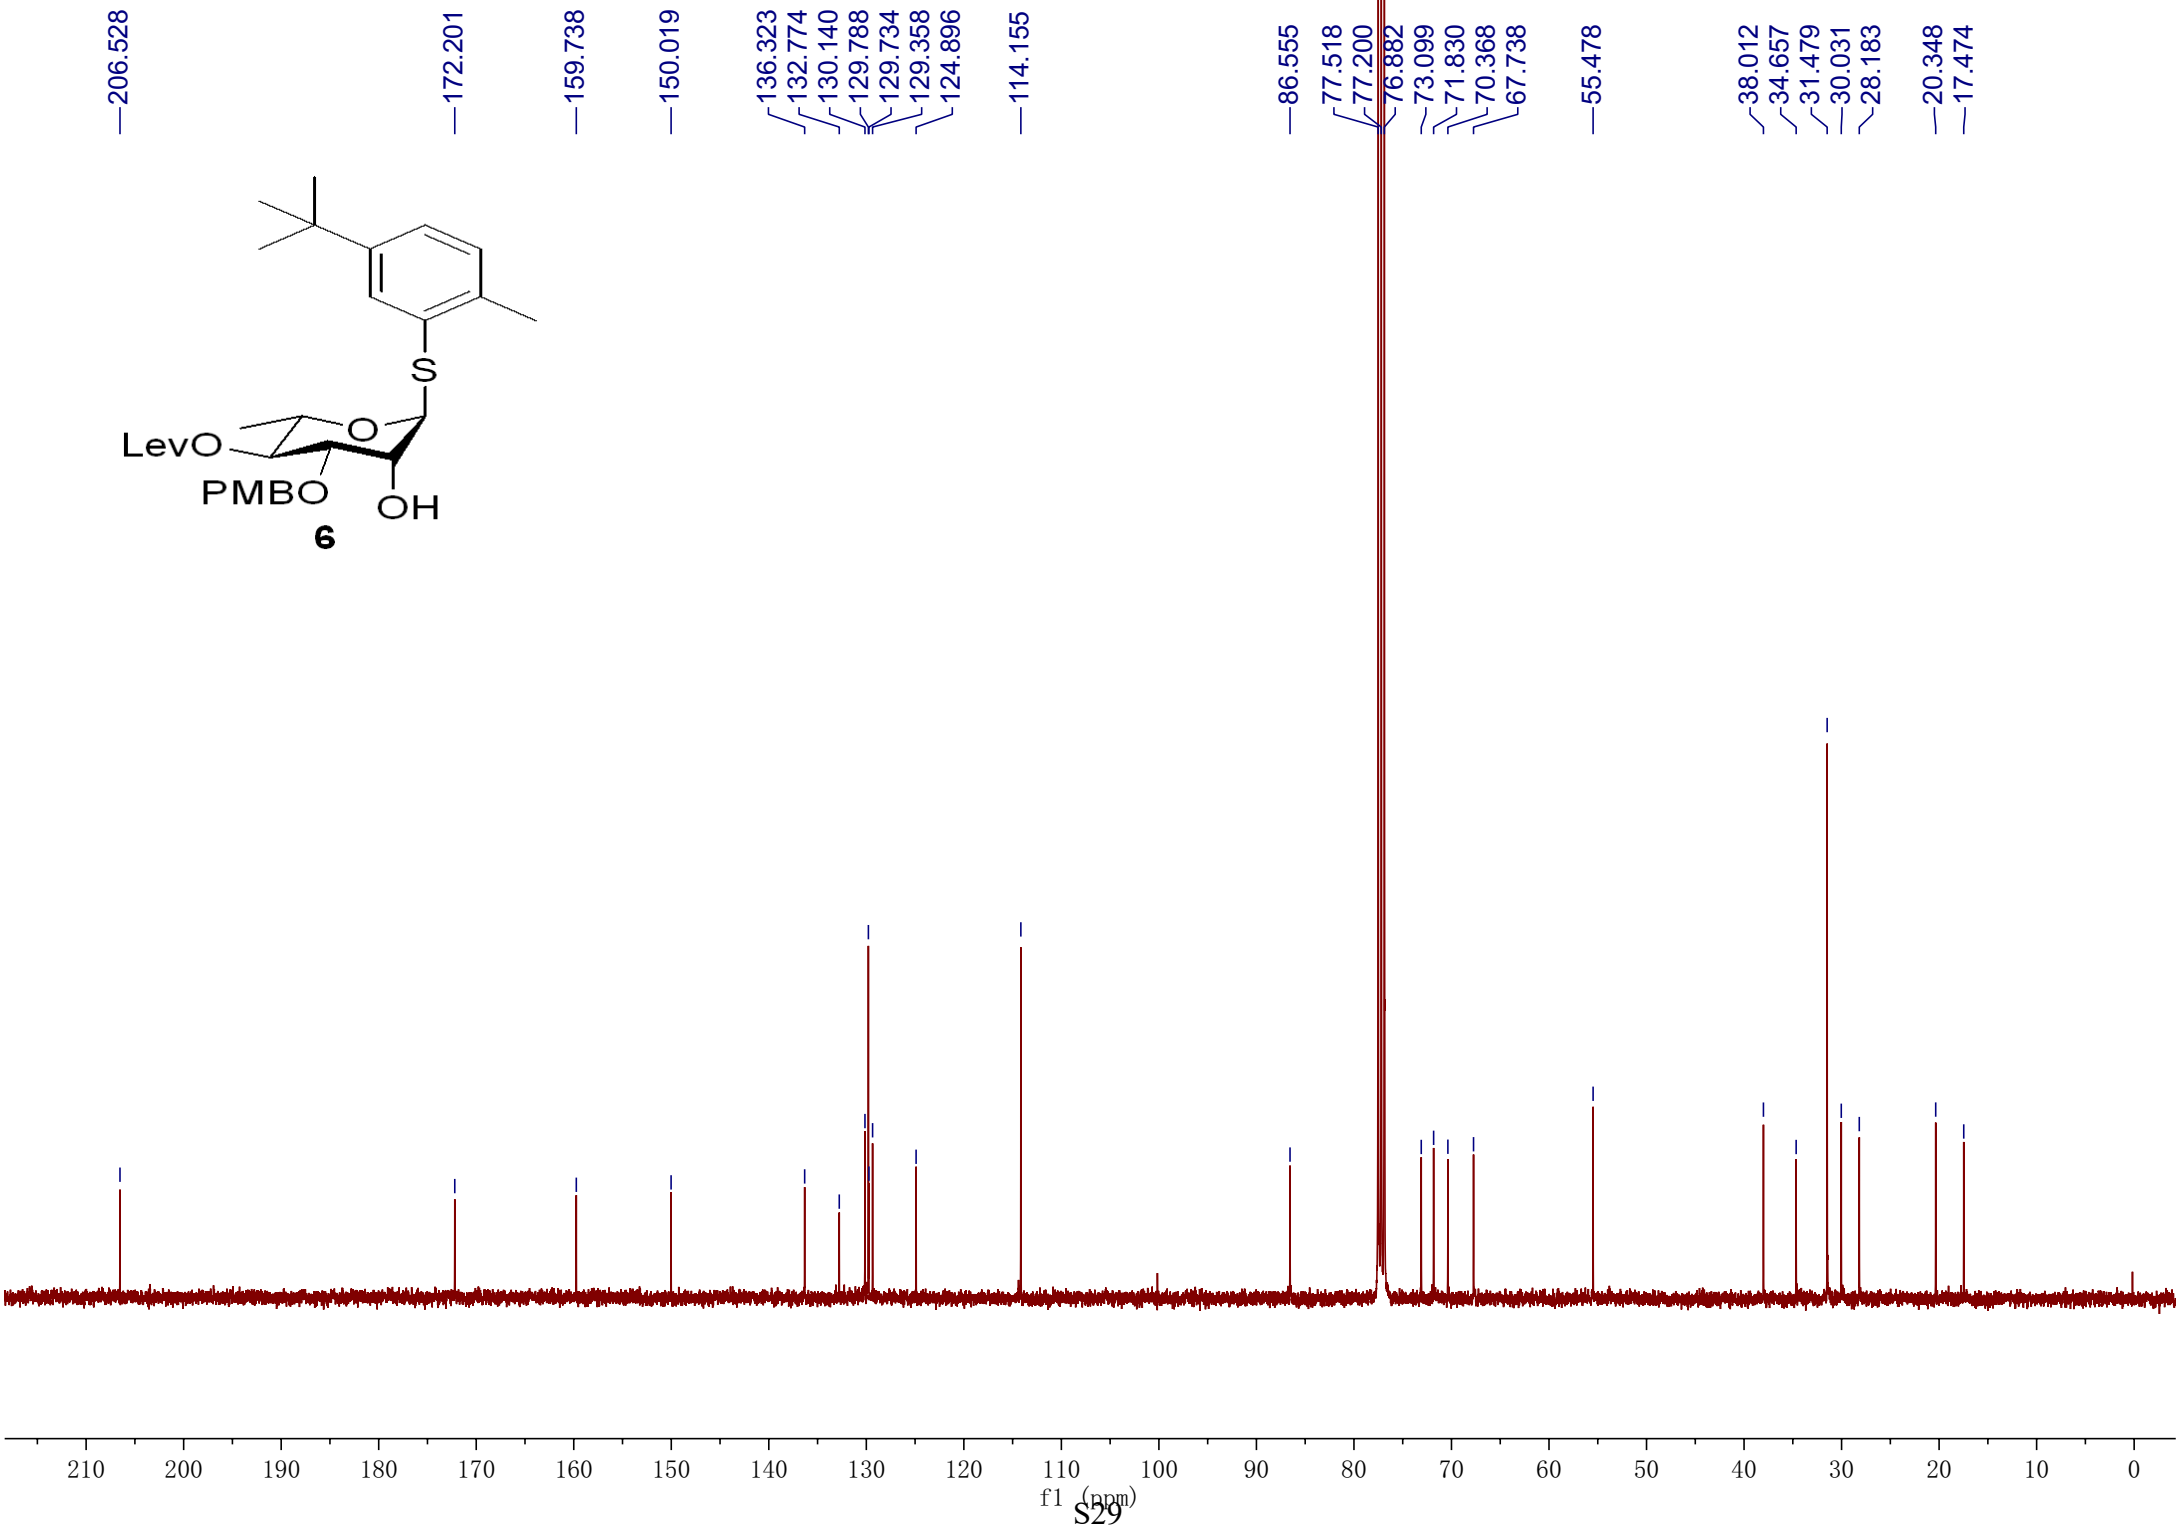

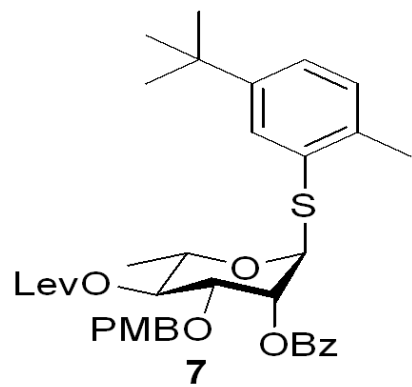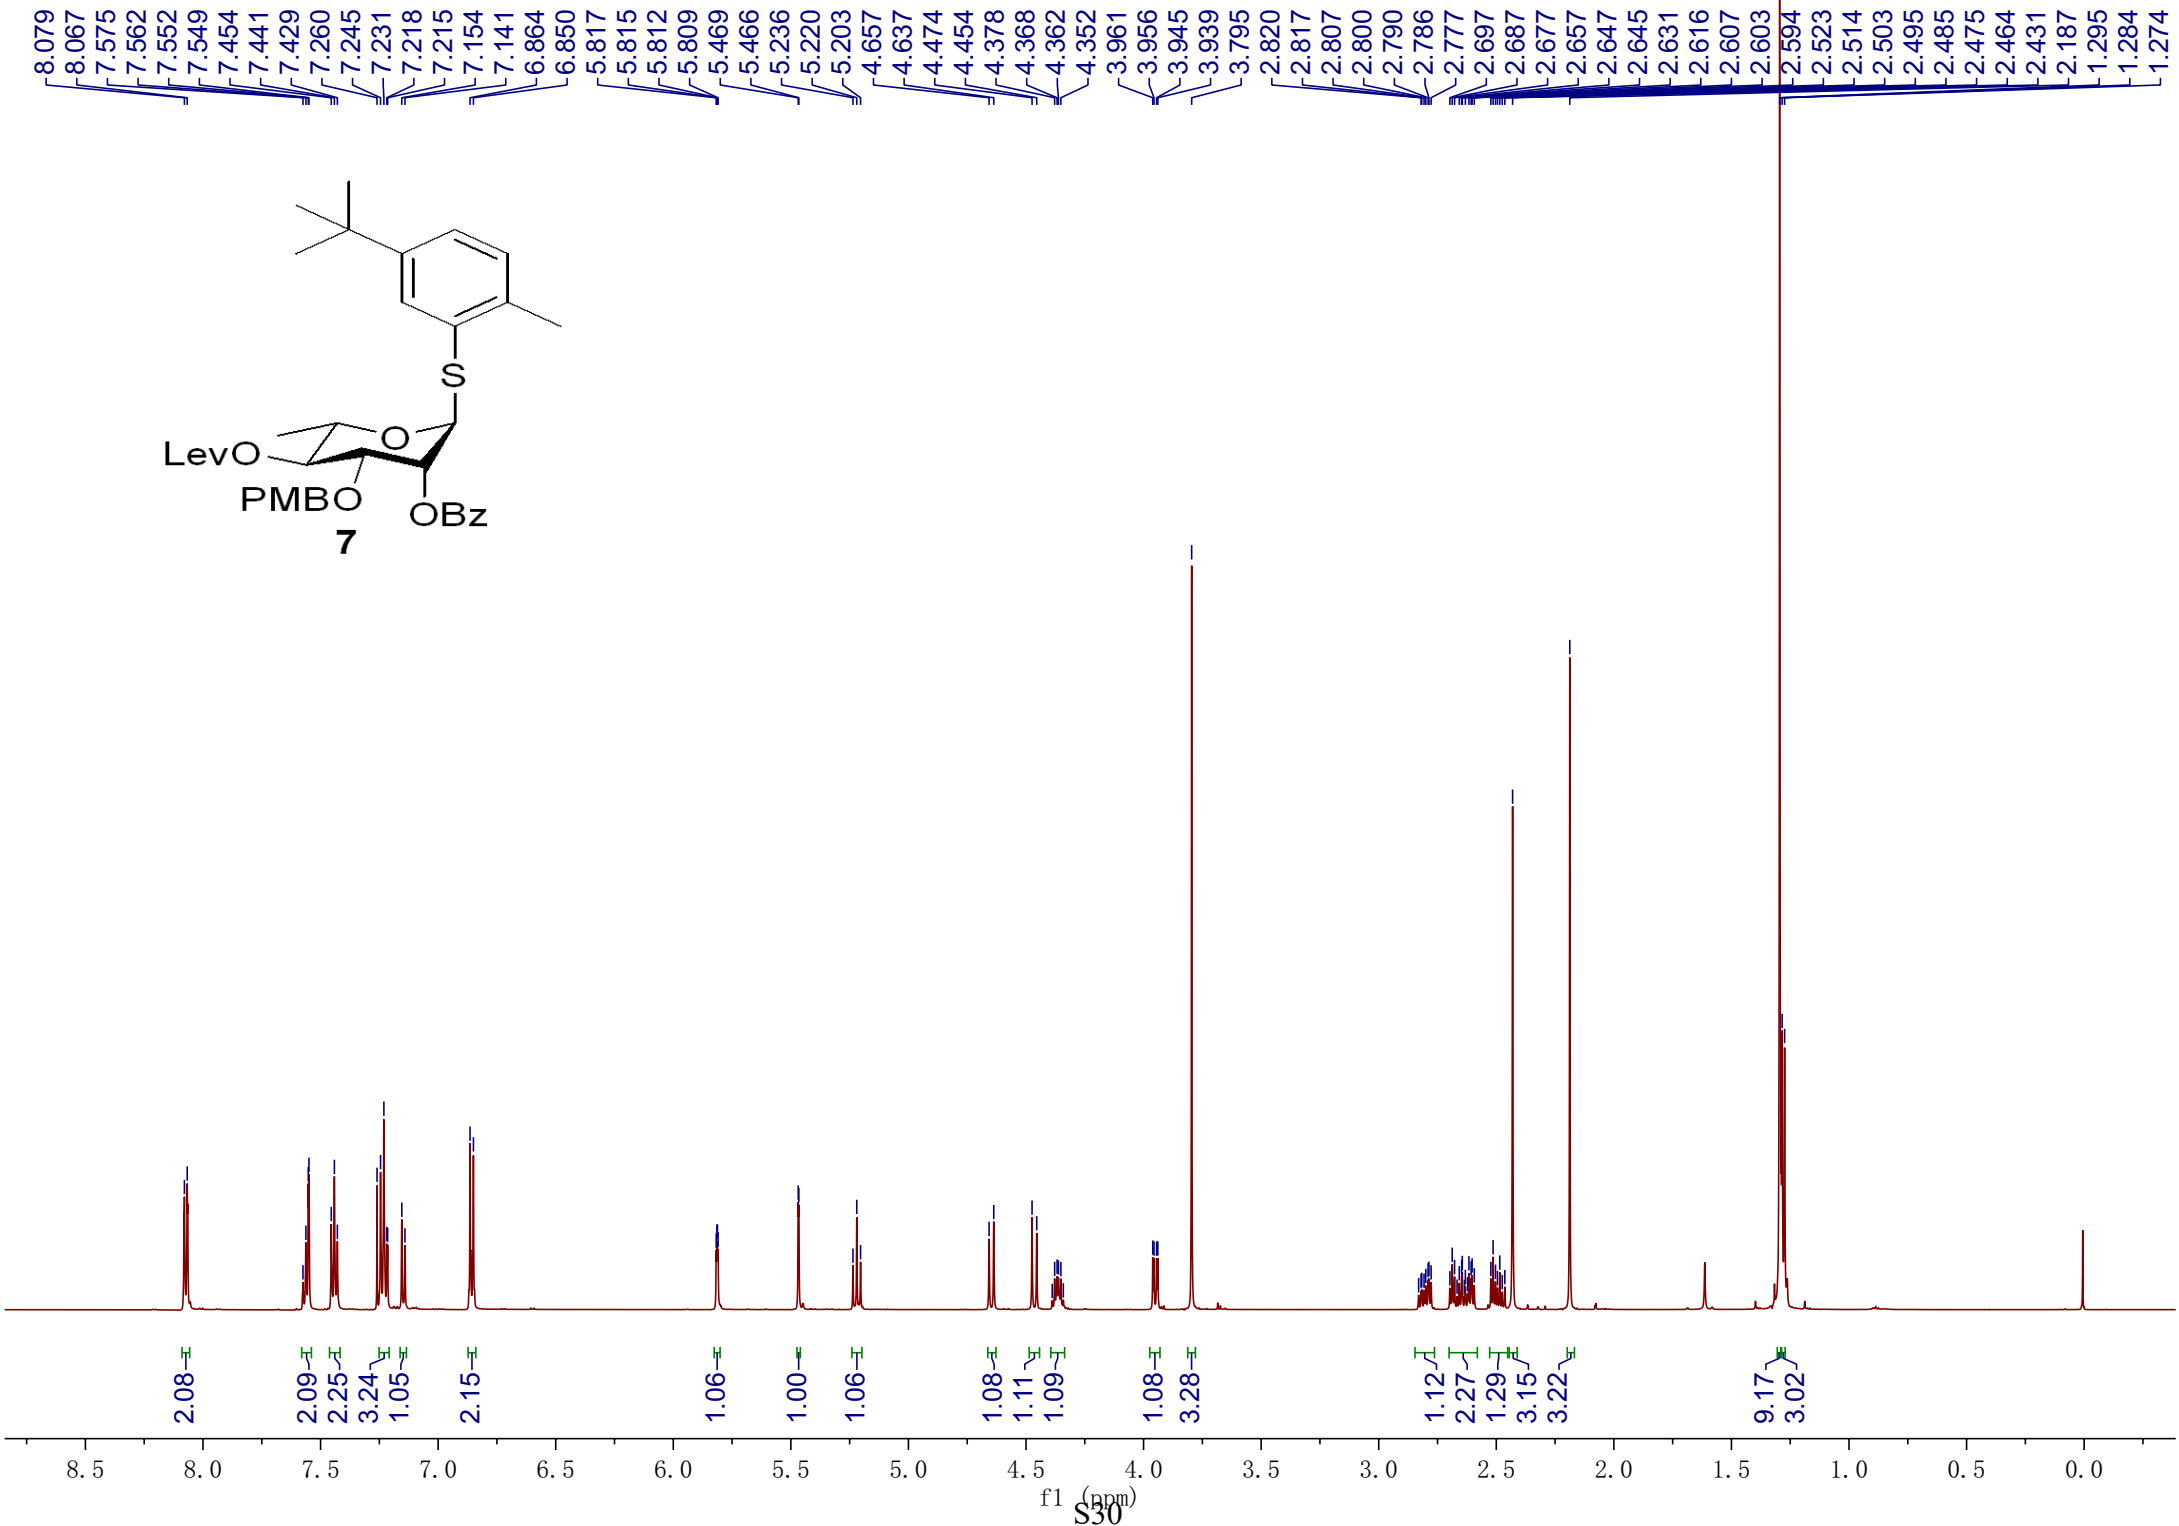

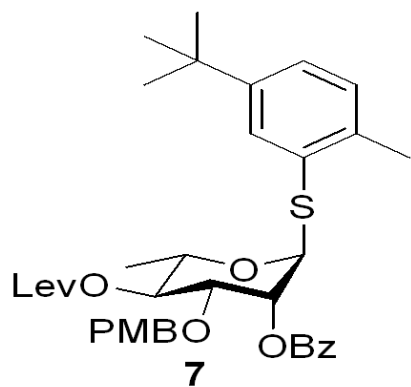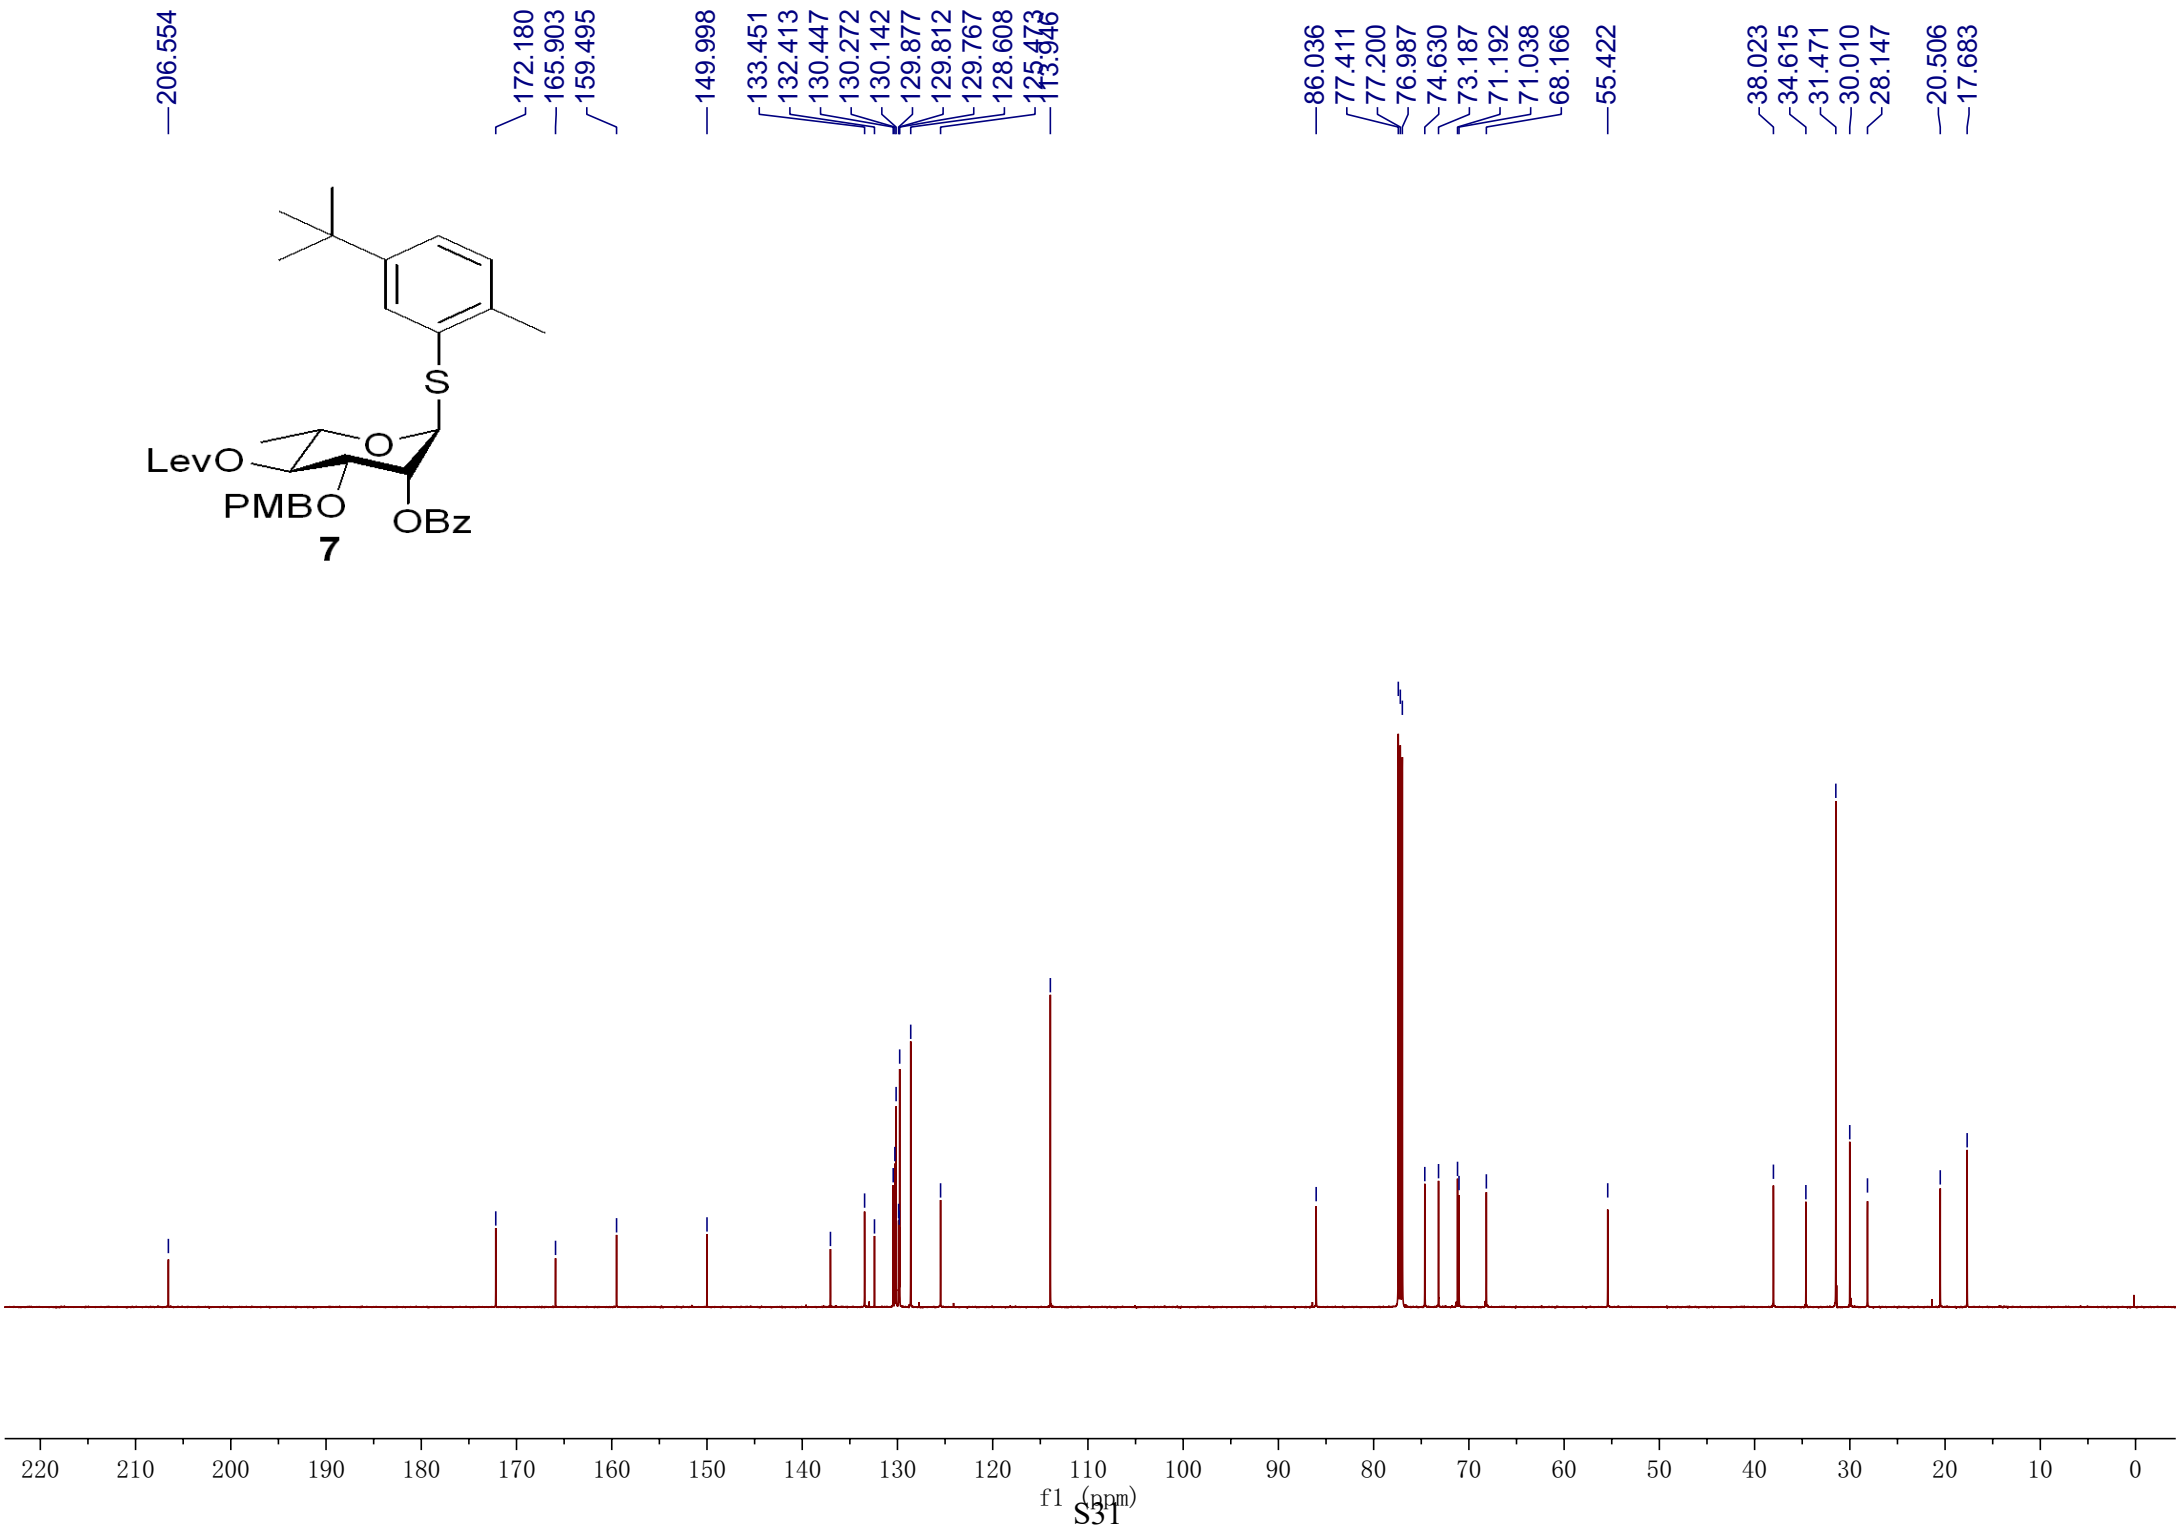

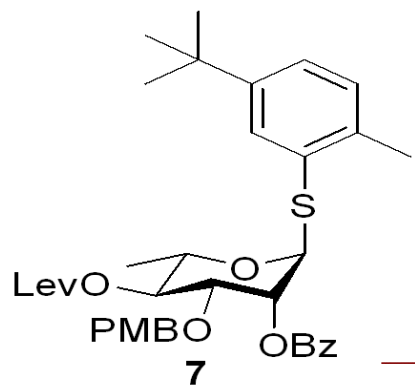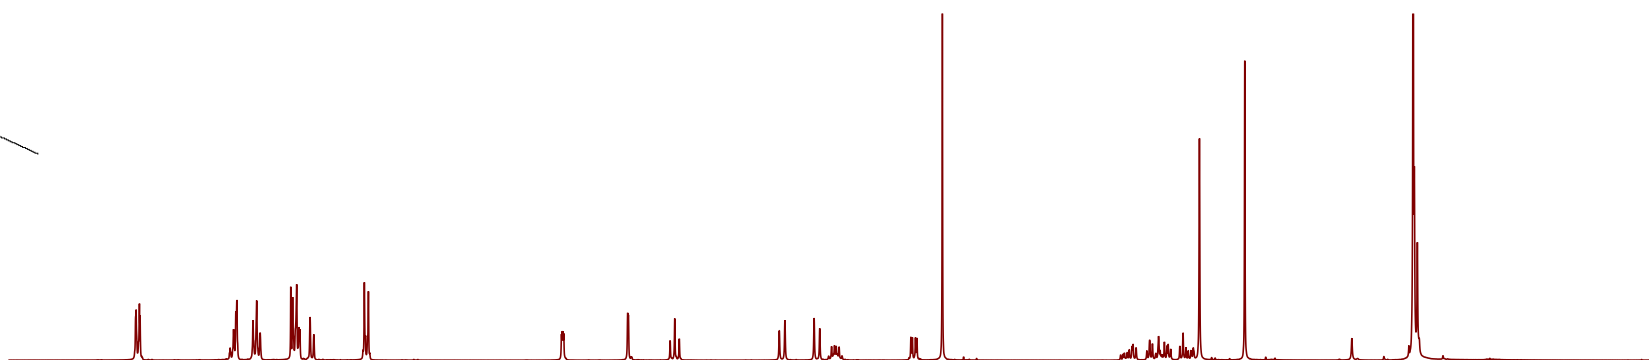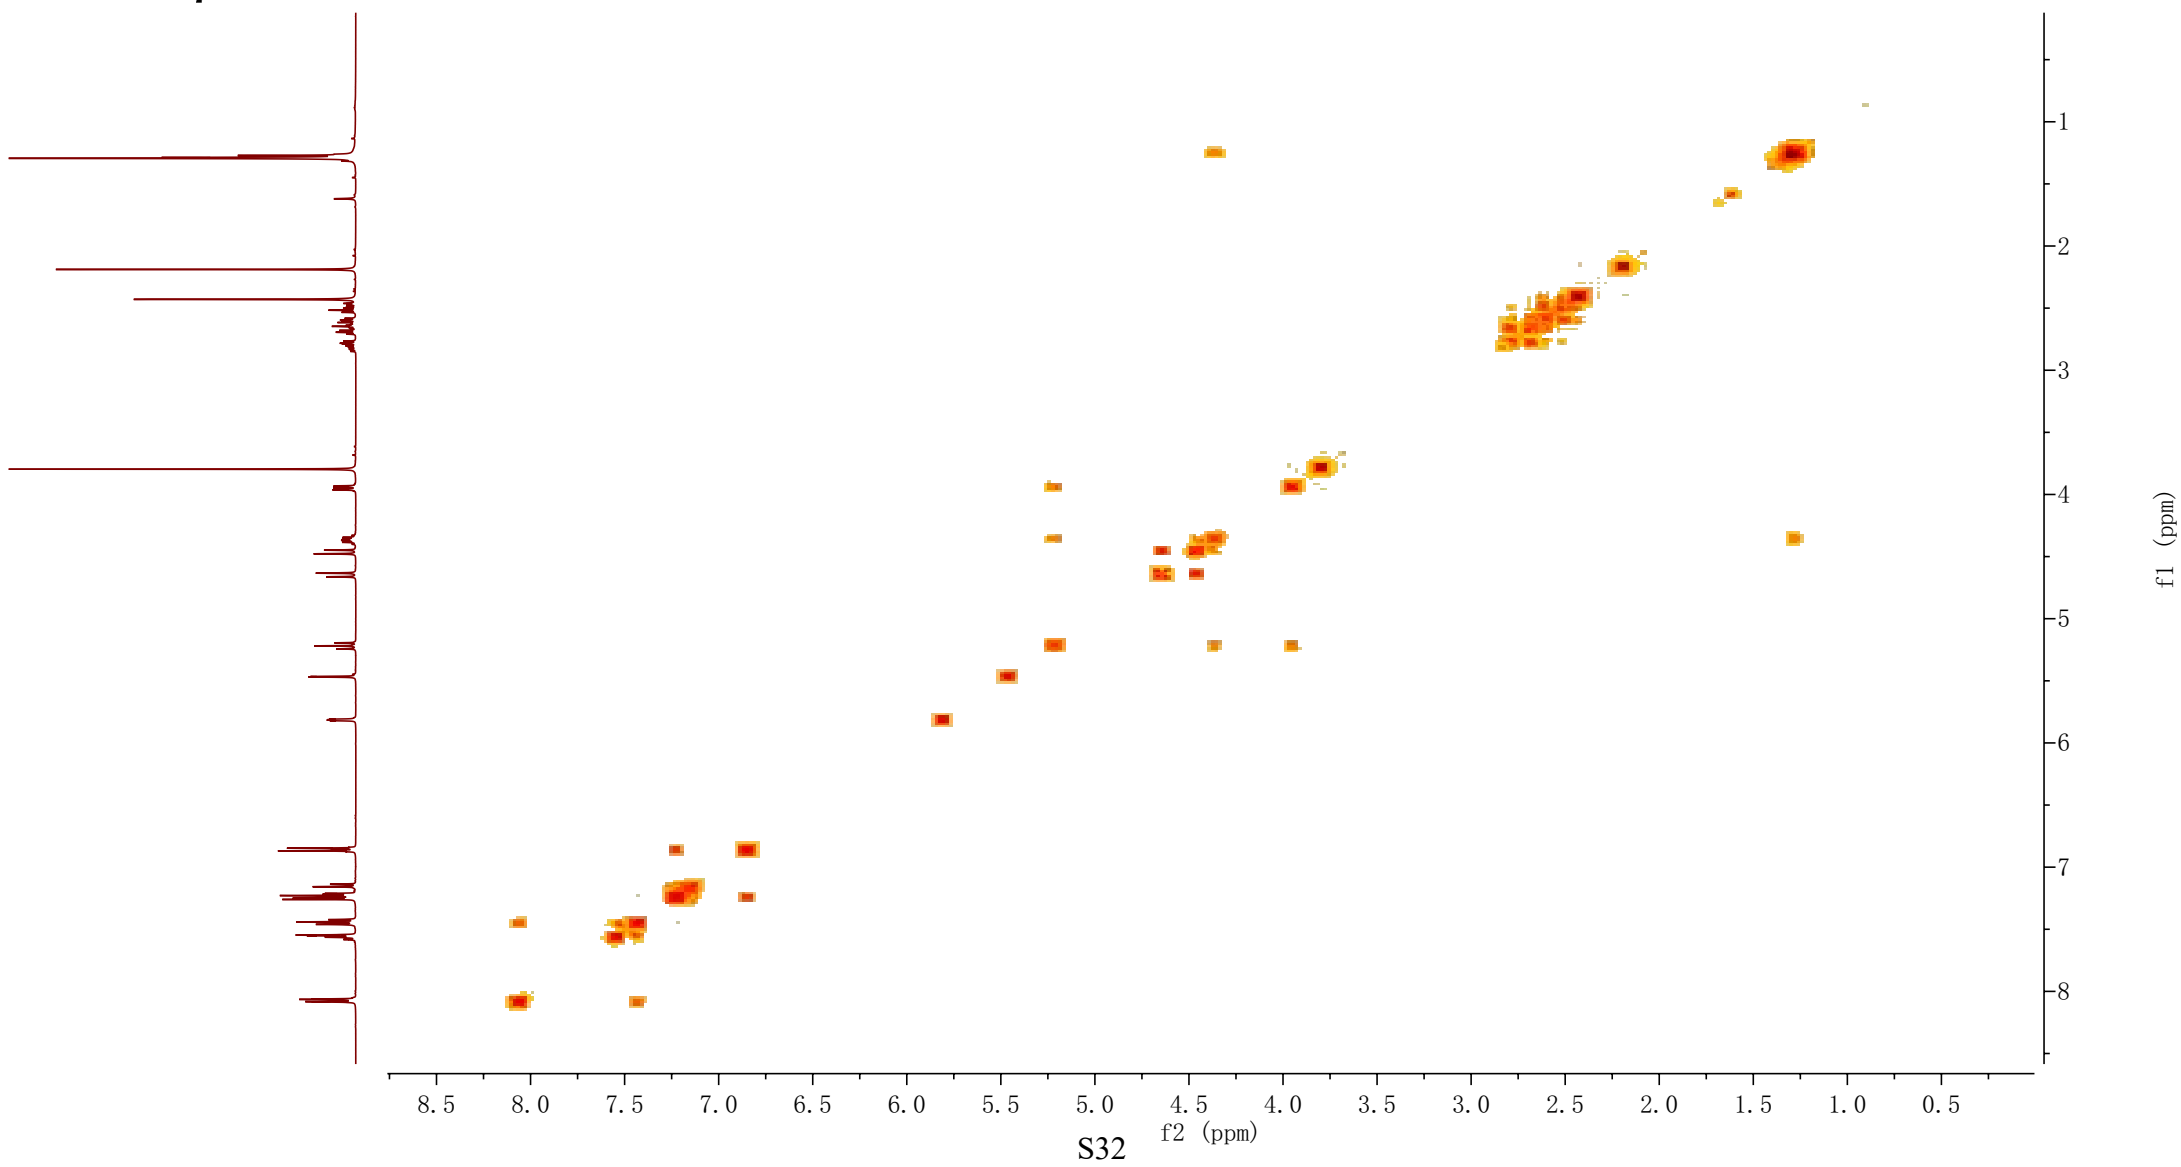



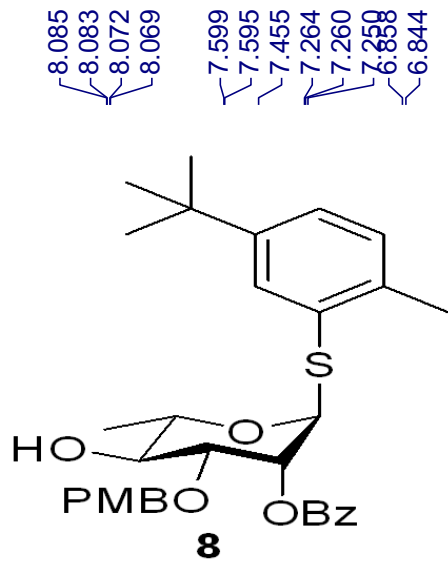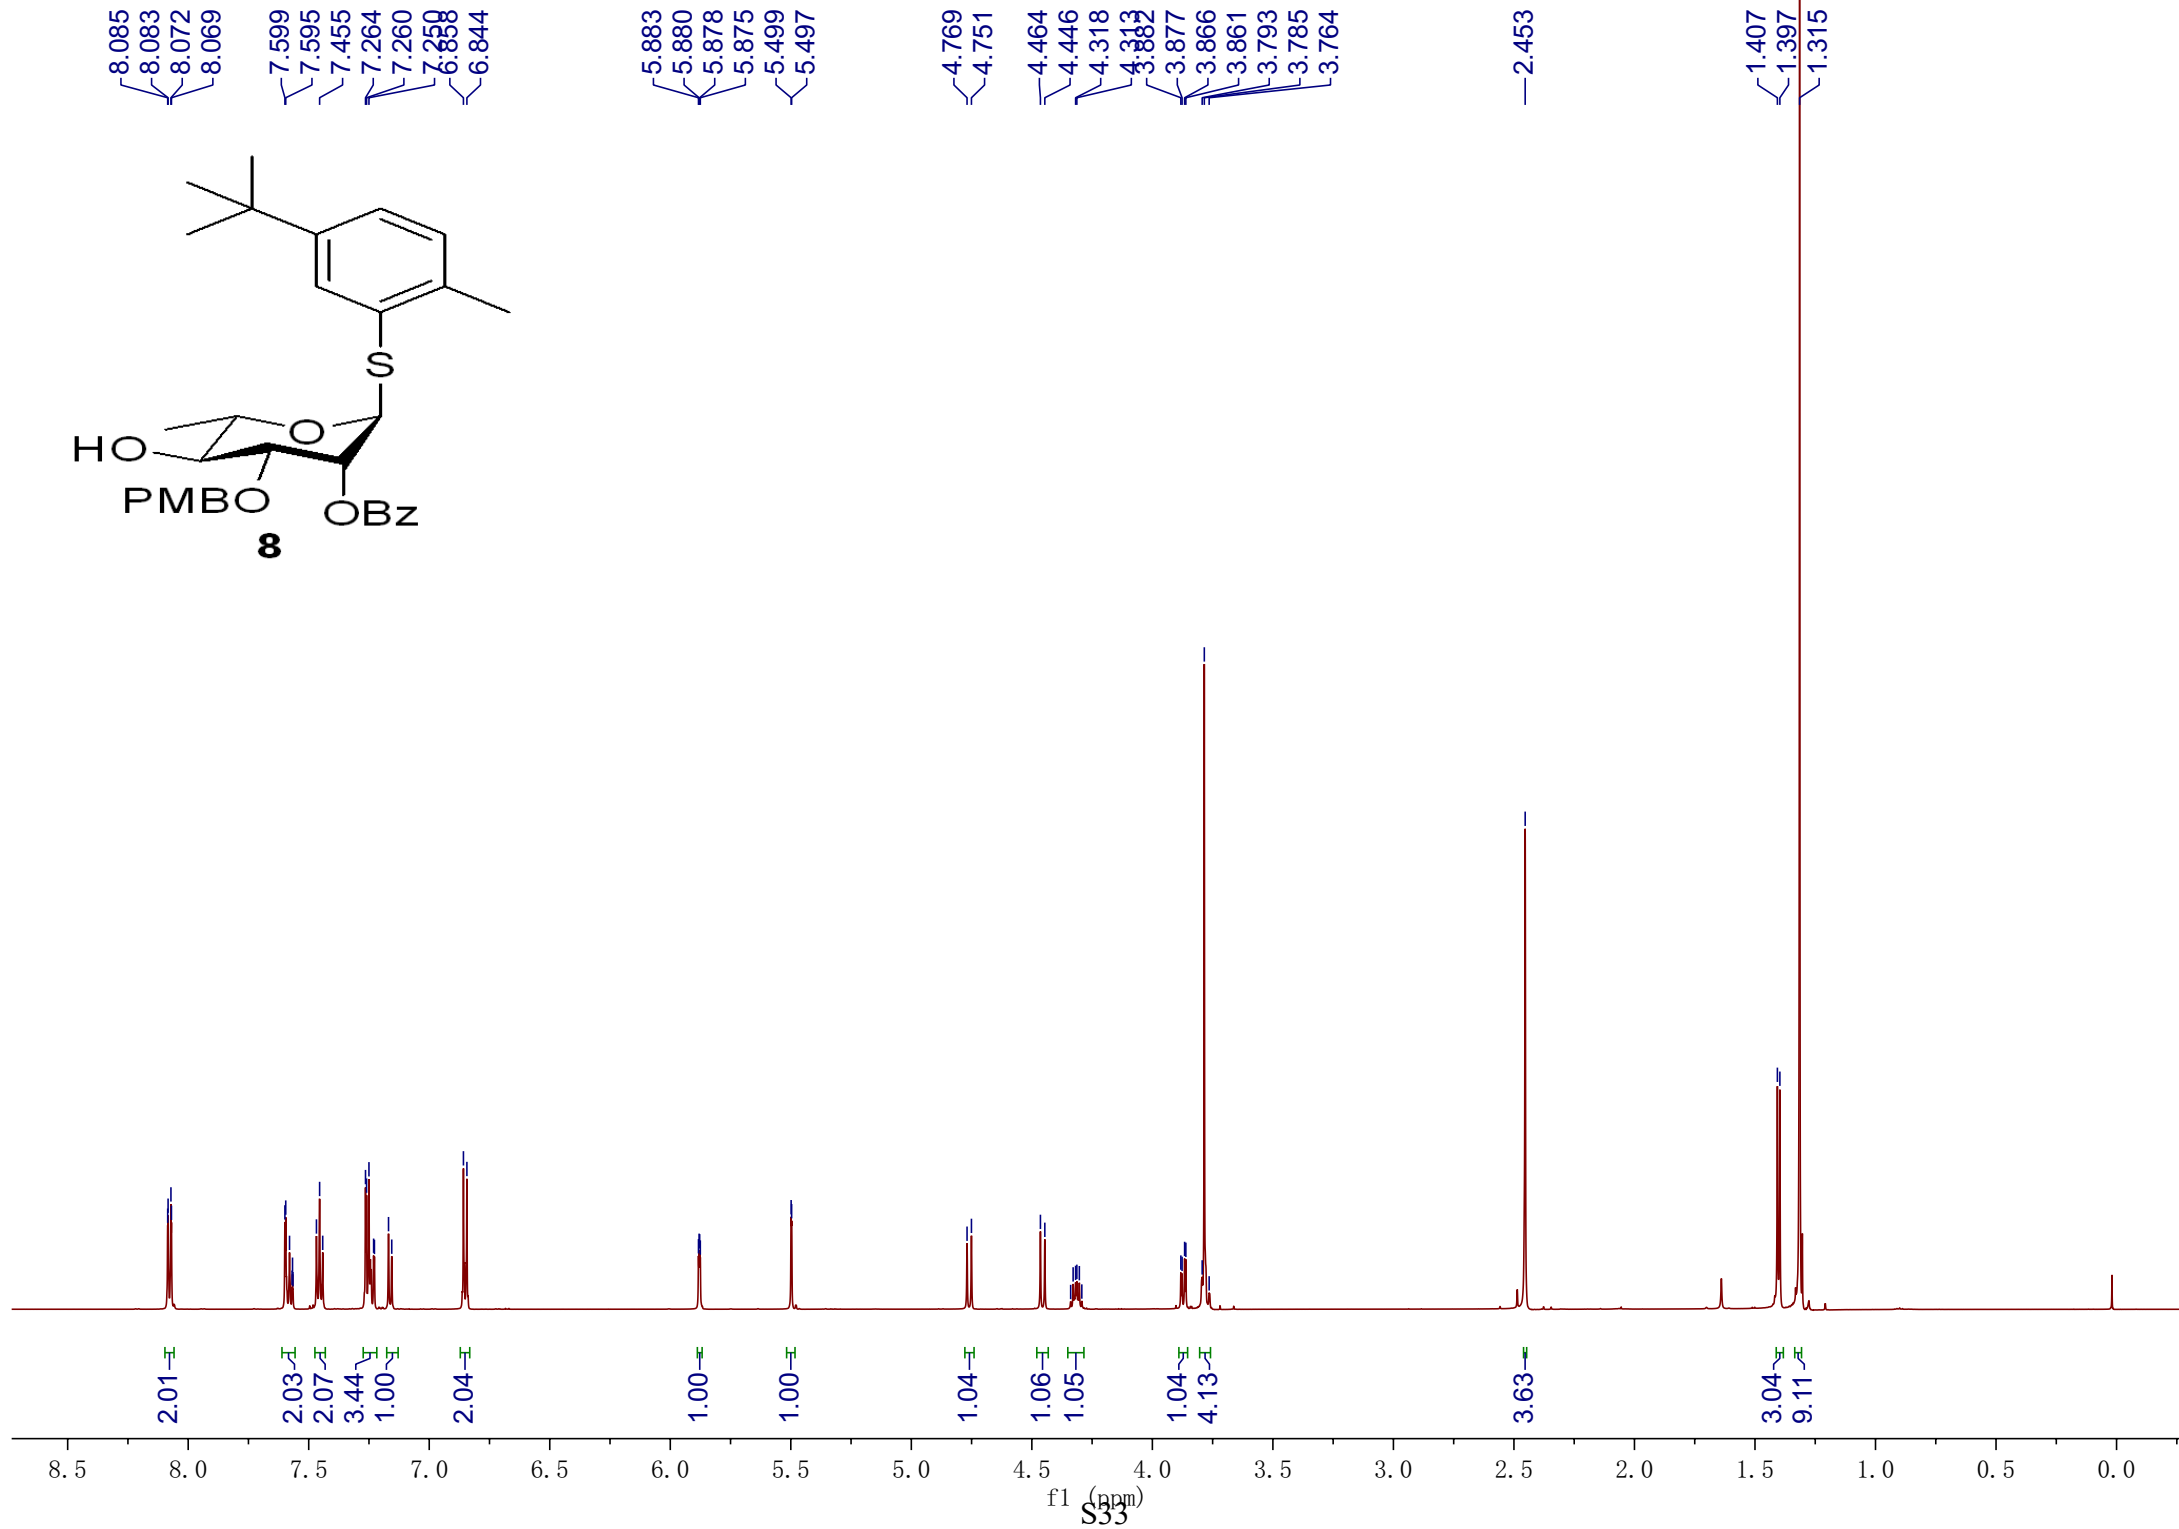

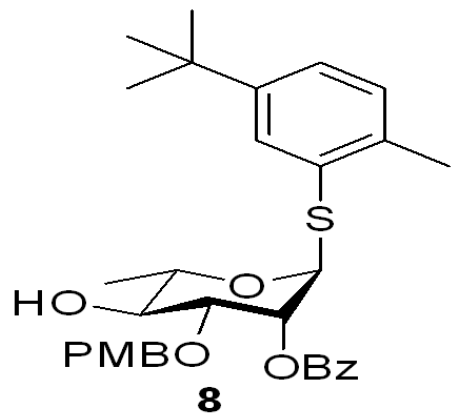

—165.857  
—159.690

—149.937  
137.084  
133.455  
132.609  
130.522  
130.237  
130.081  
130.061  
129.915  
129.558  
128.594  
125.396  
—114.178

—86.215  
77.969  
77.411  
77.200  
76.988  
72.321  
71.196  
70.670  
69.614

—55.404

—34.610  
—31.477

—20.518  
—17.990

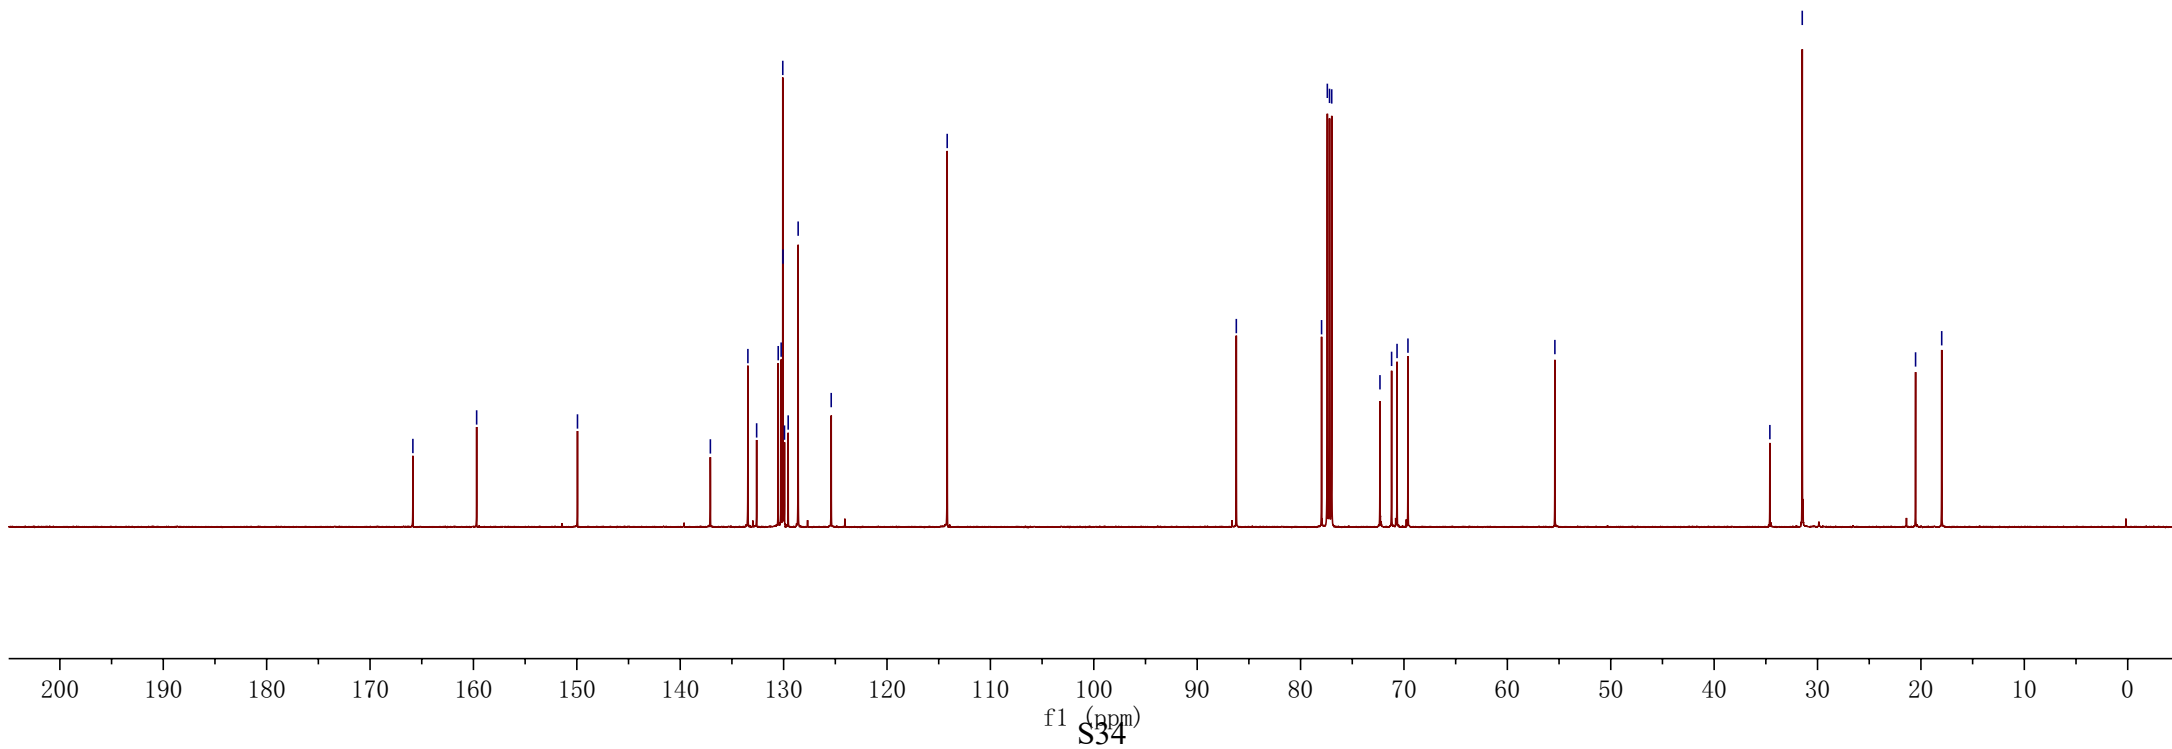

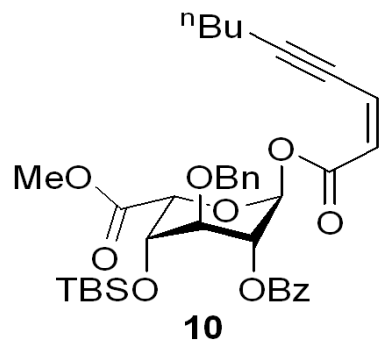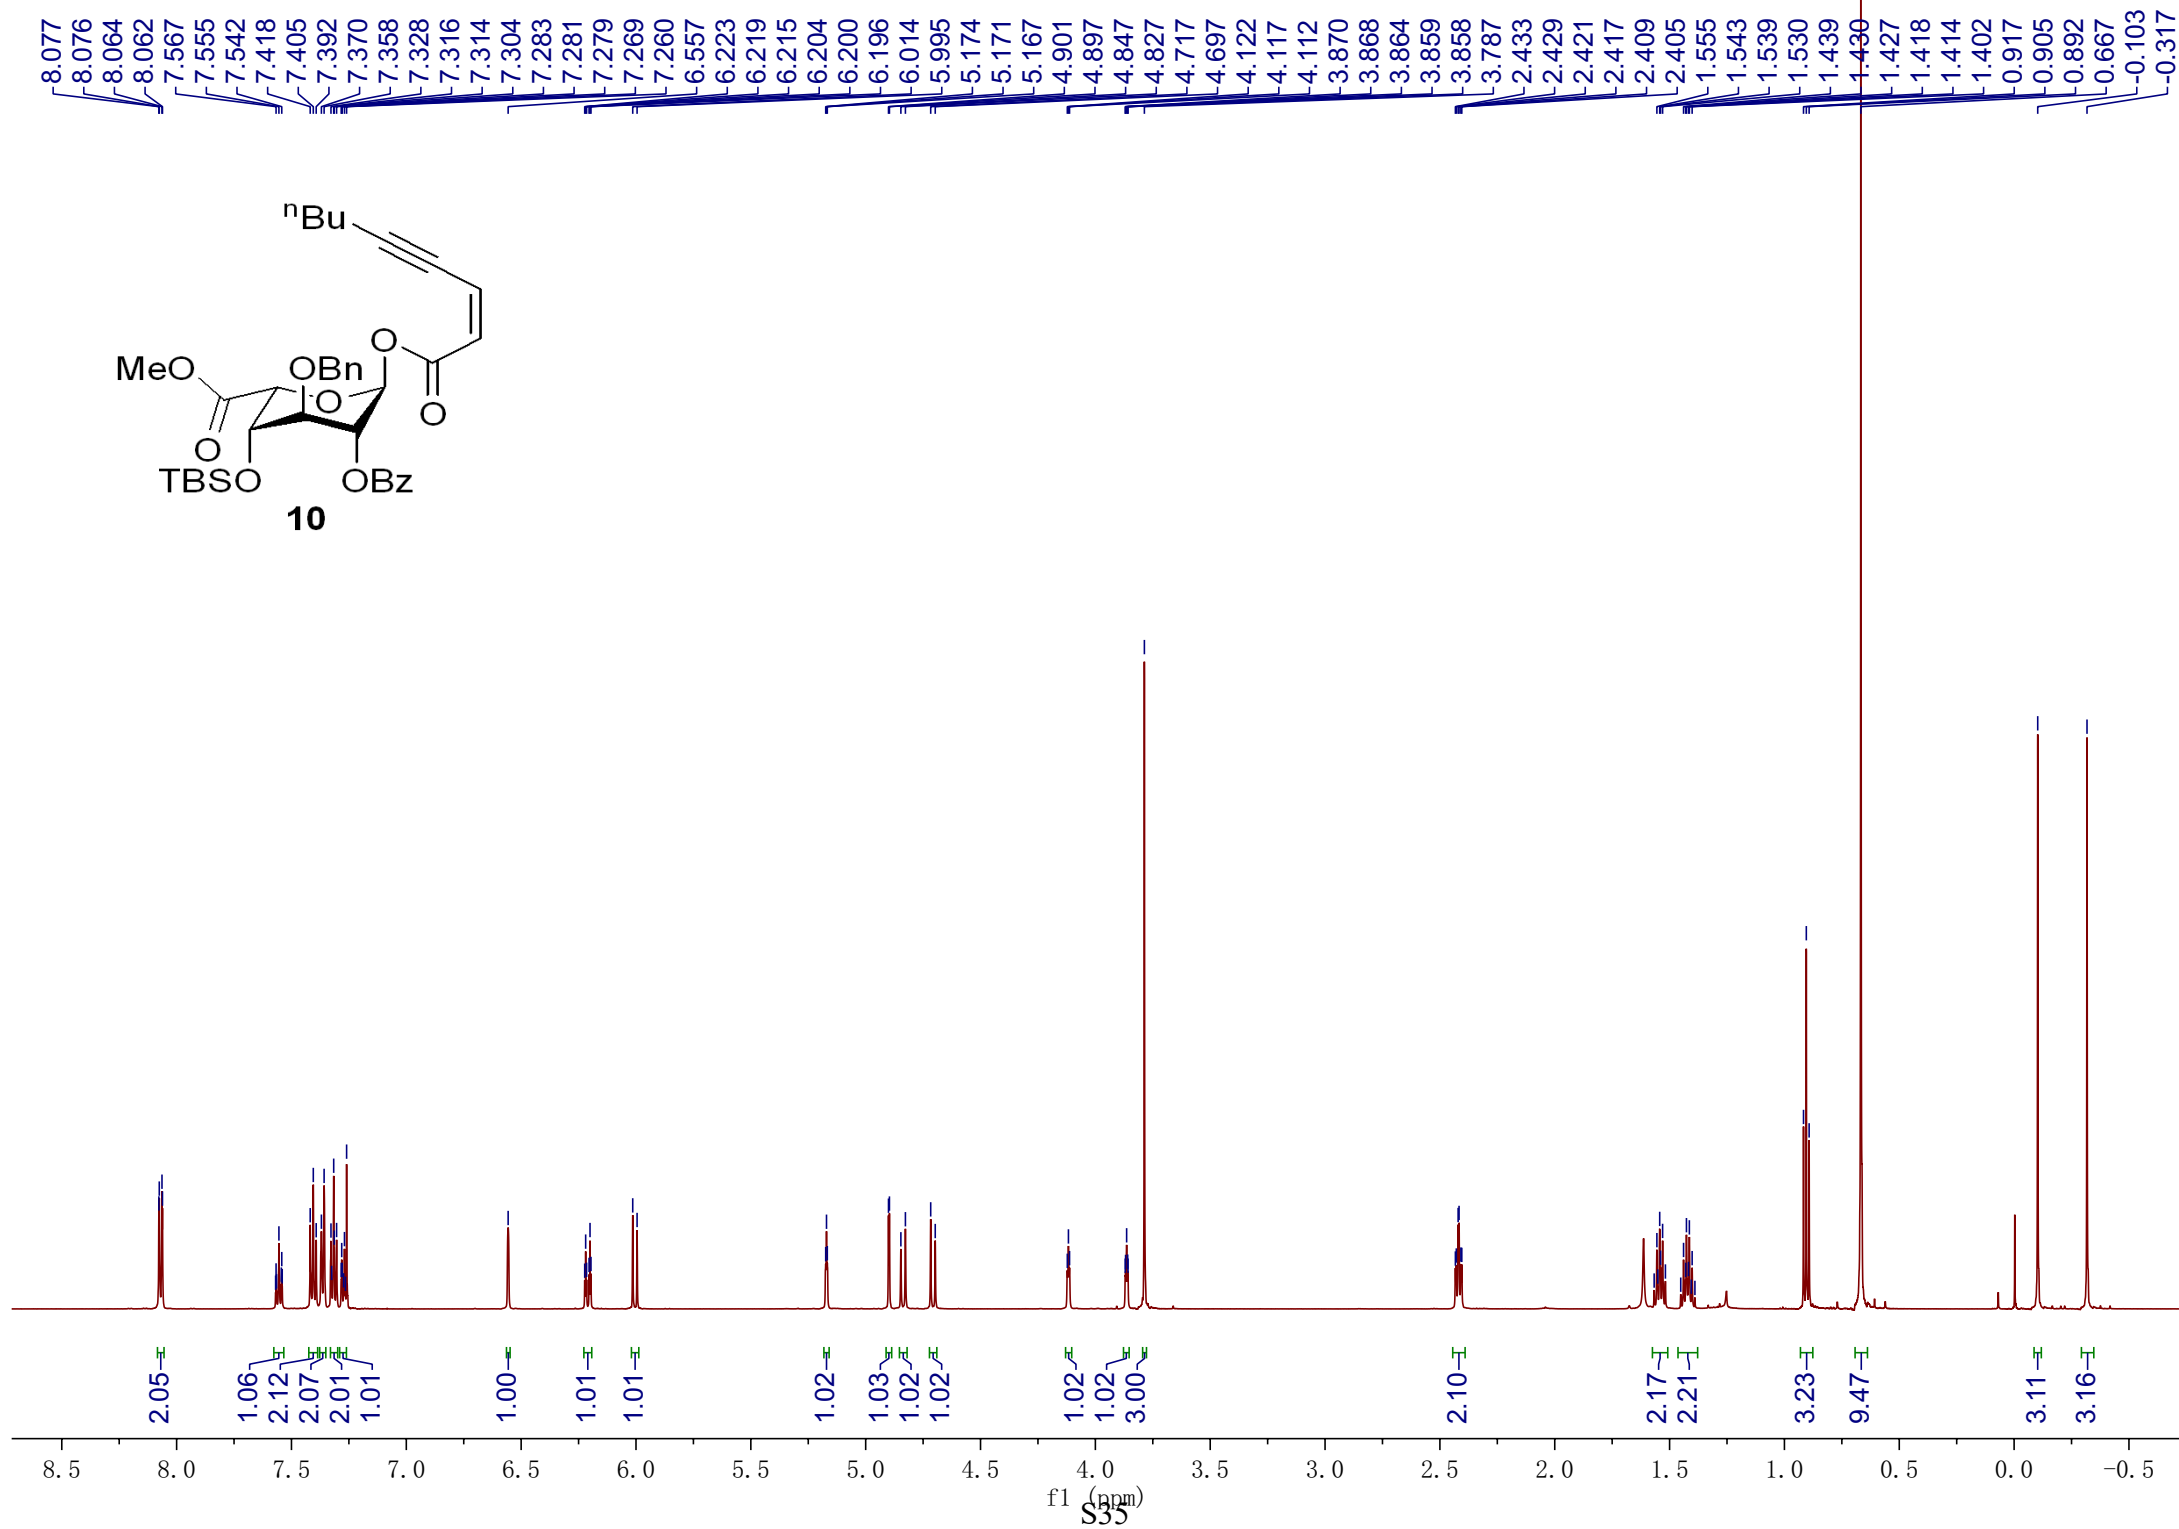

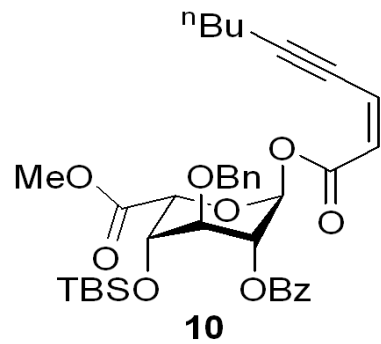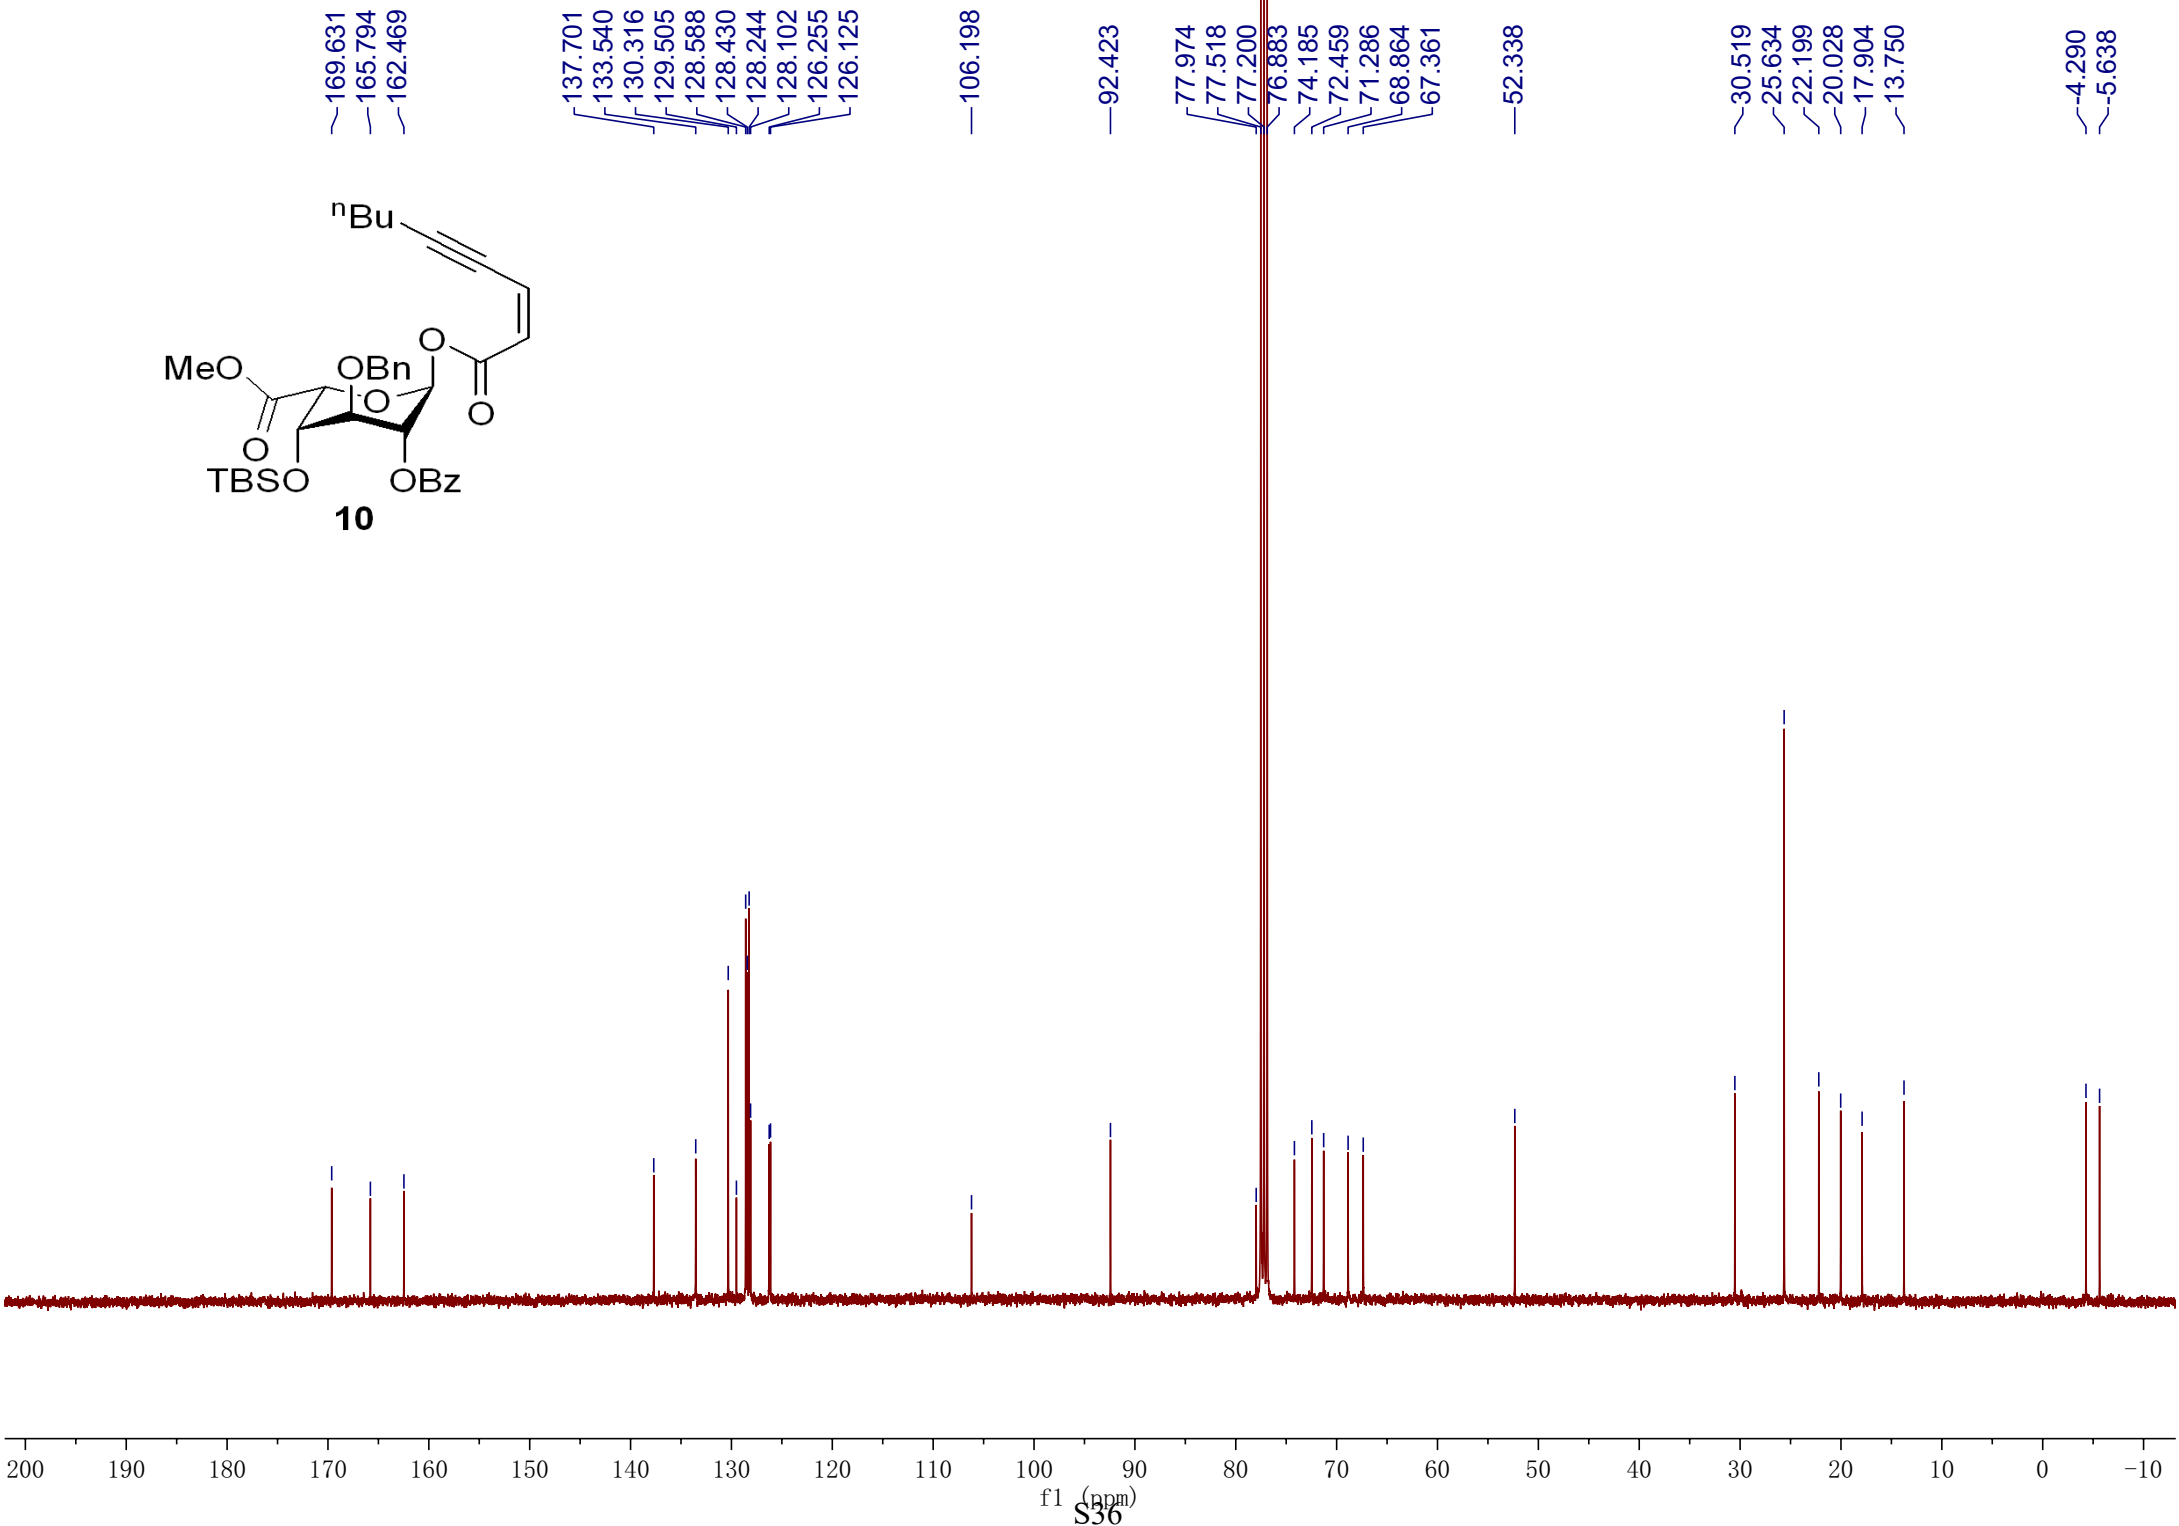

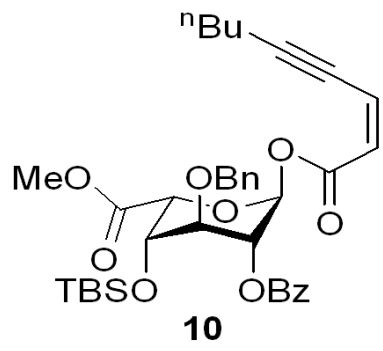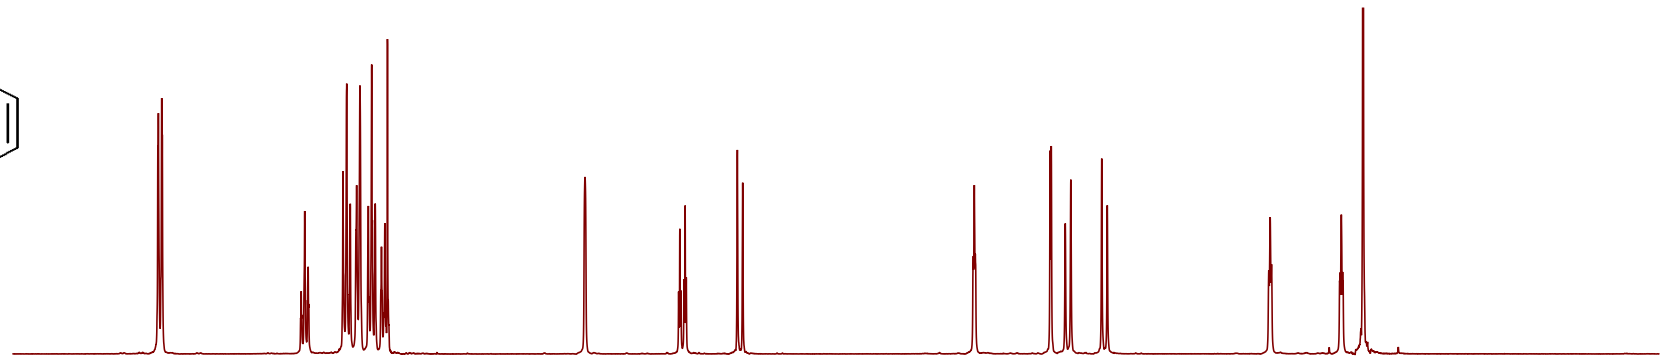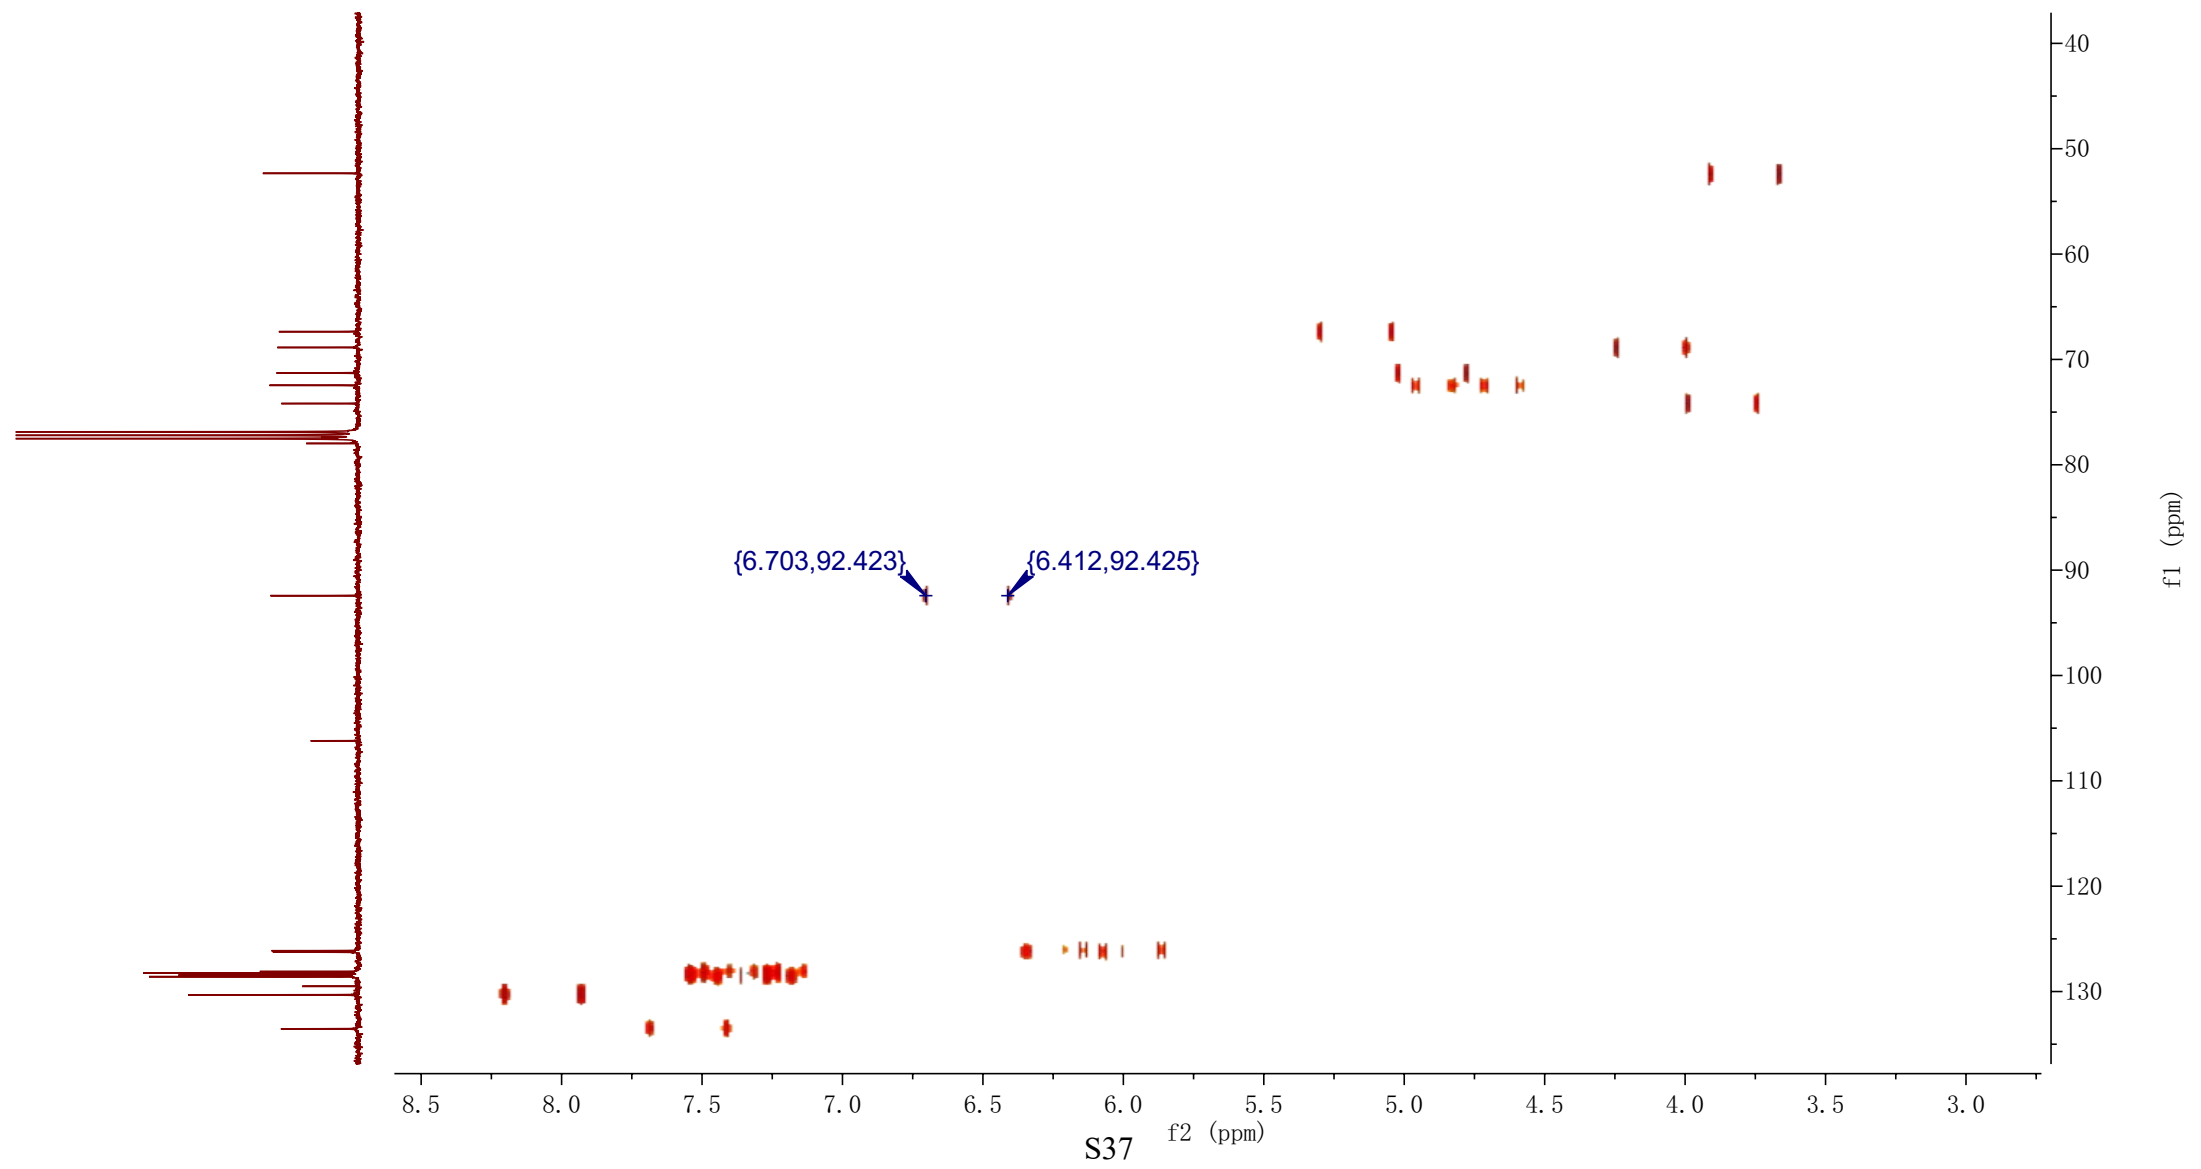

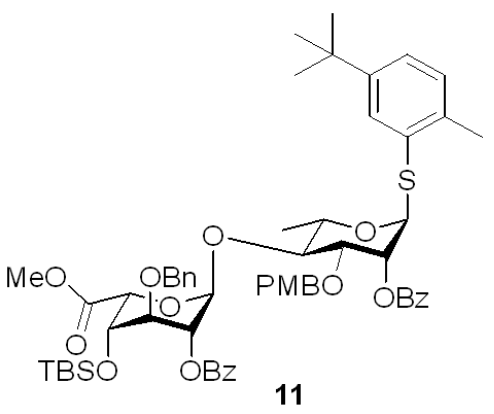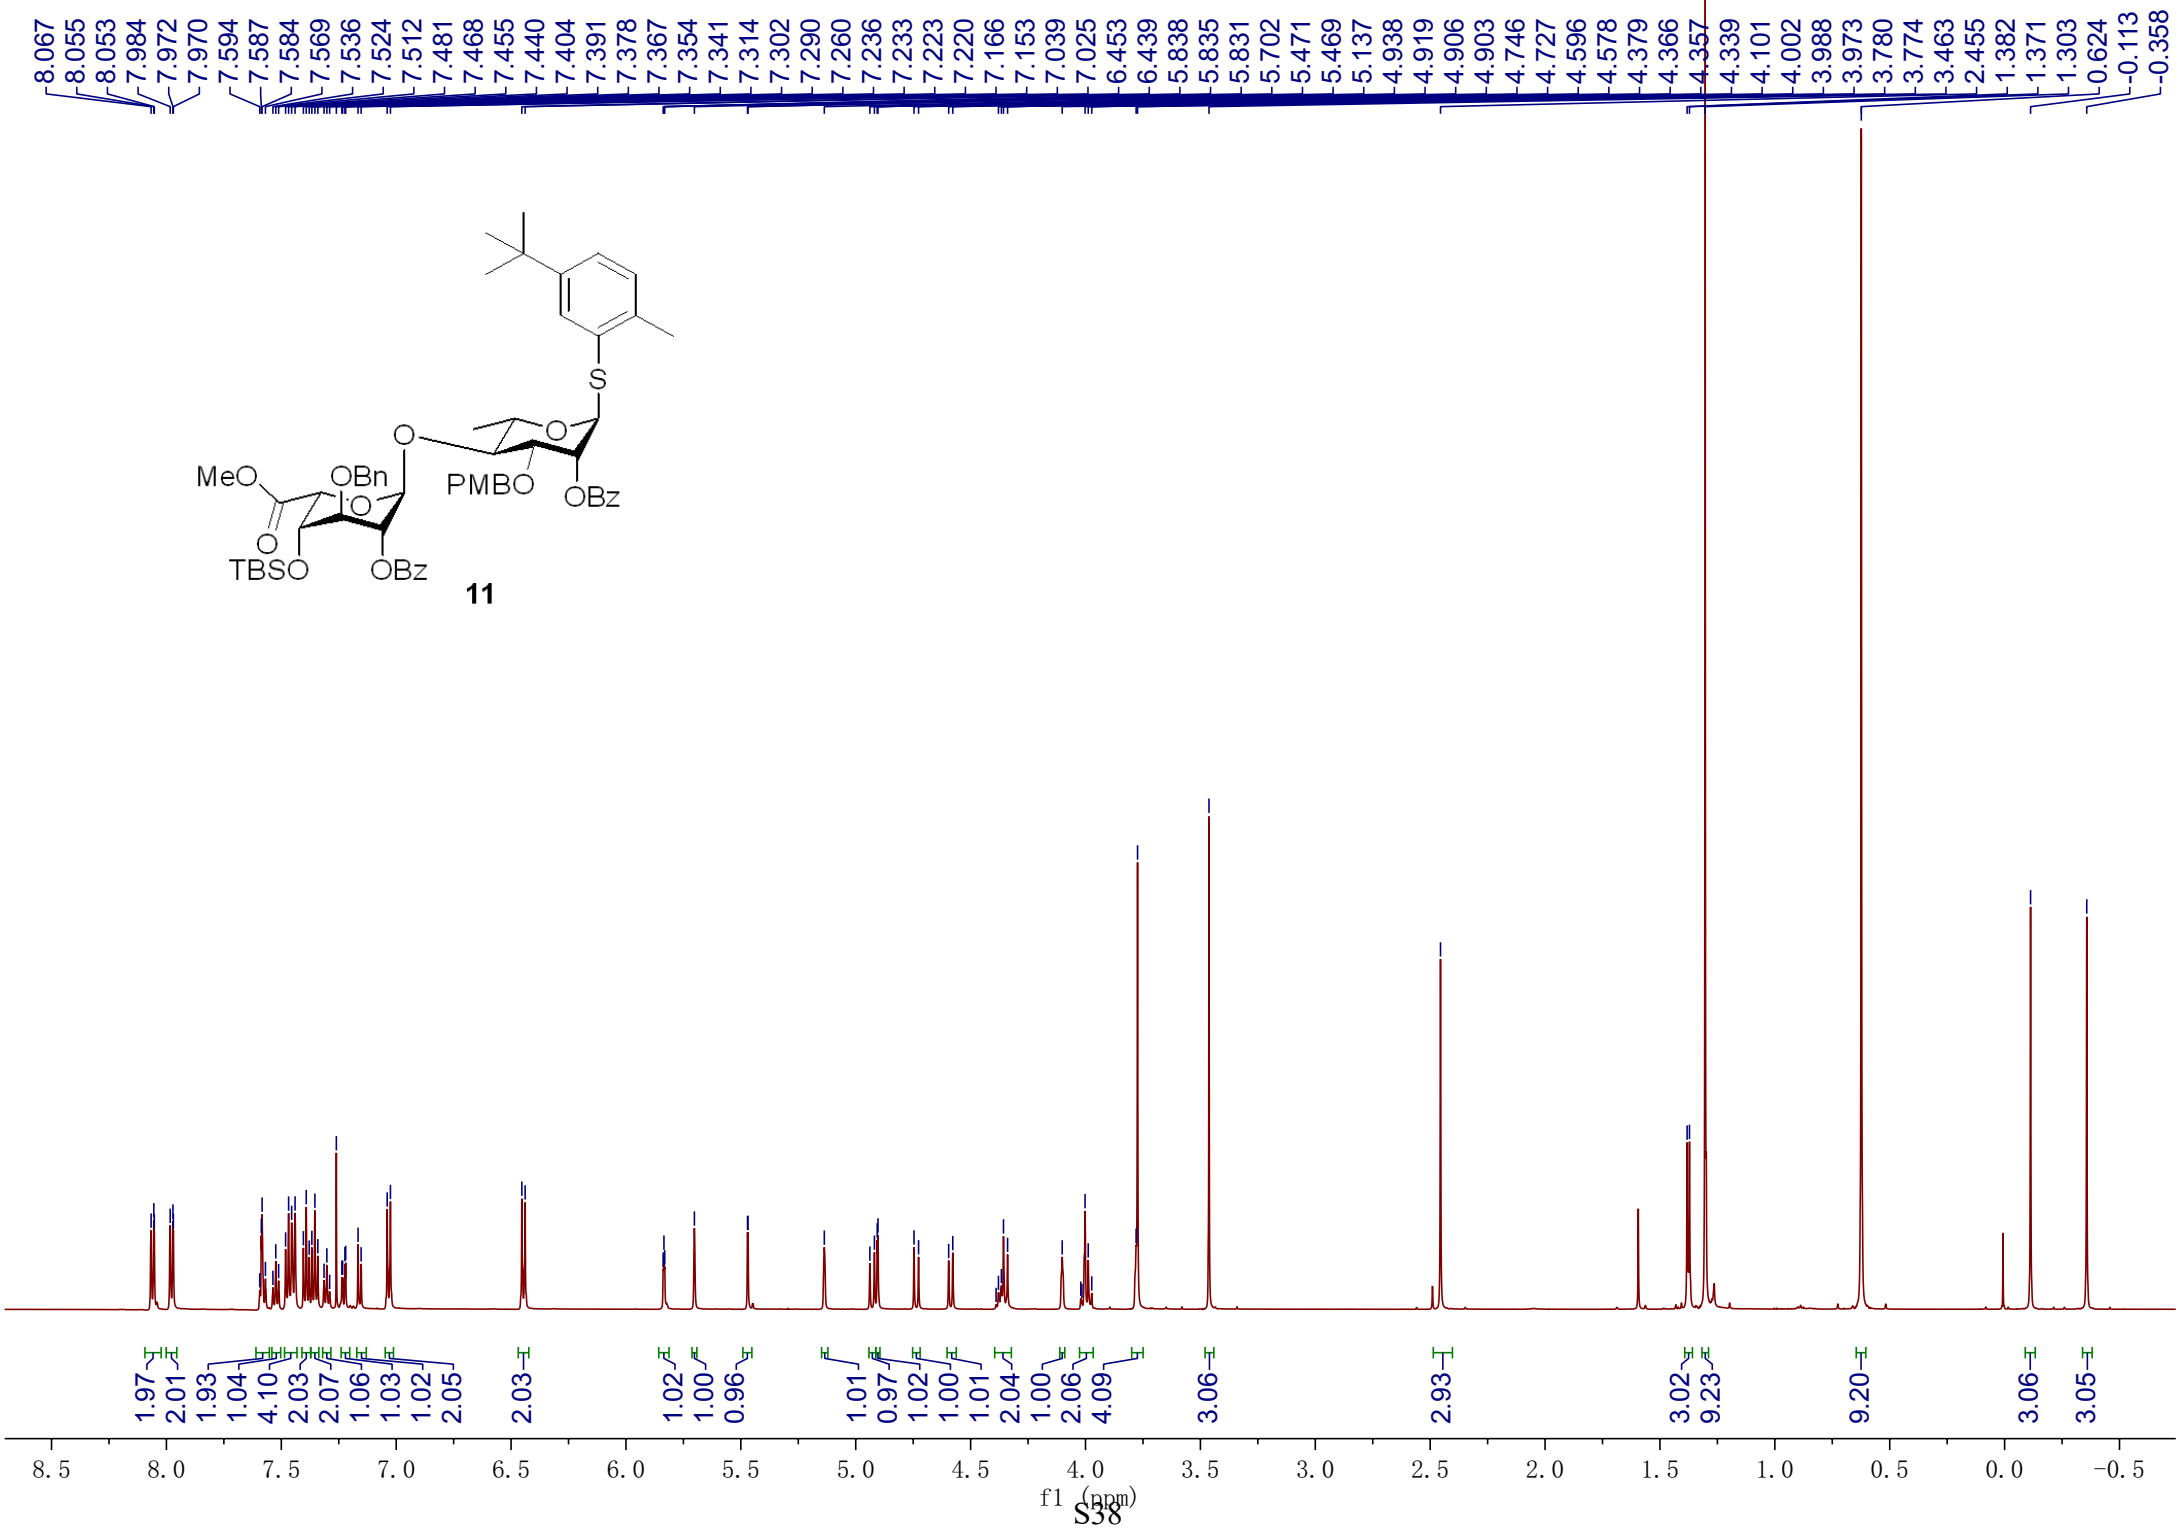

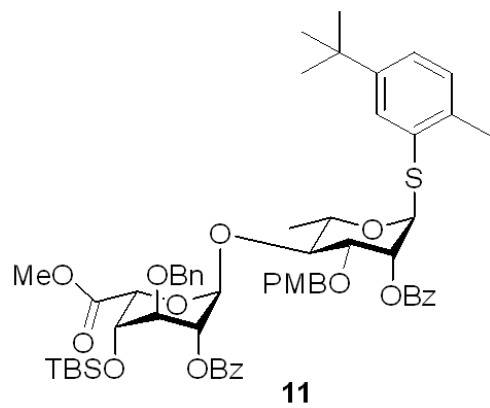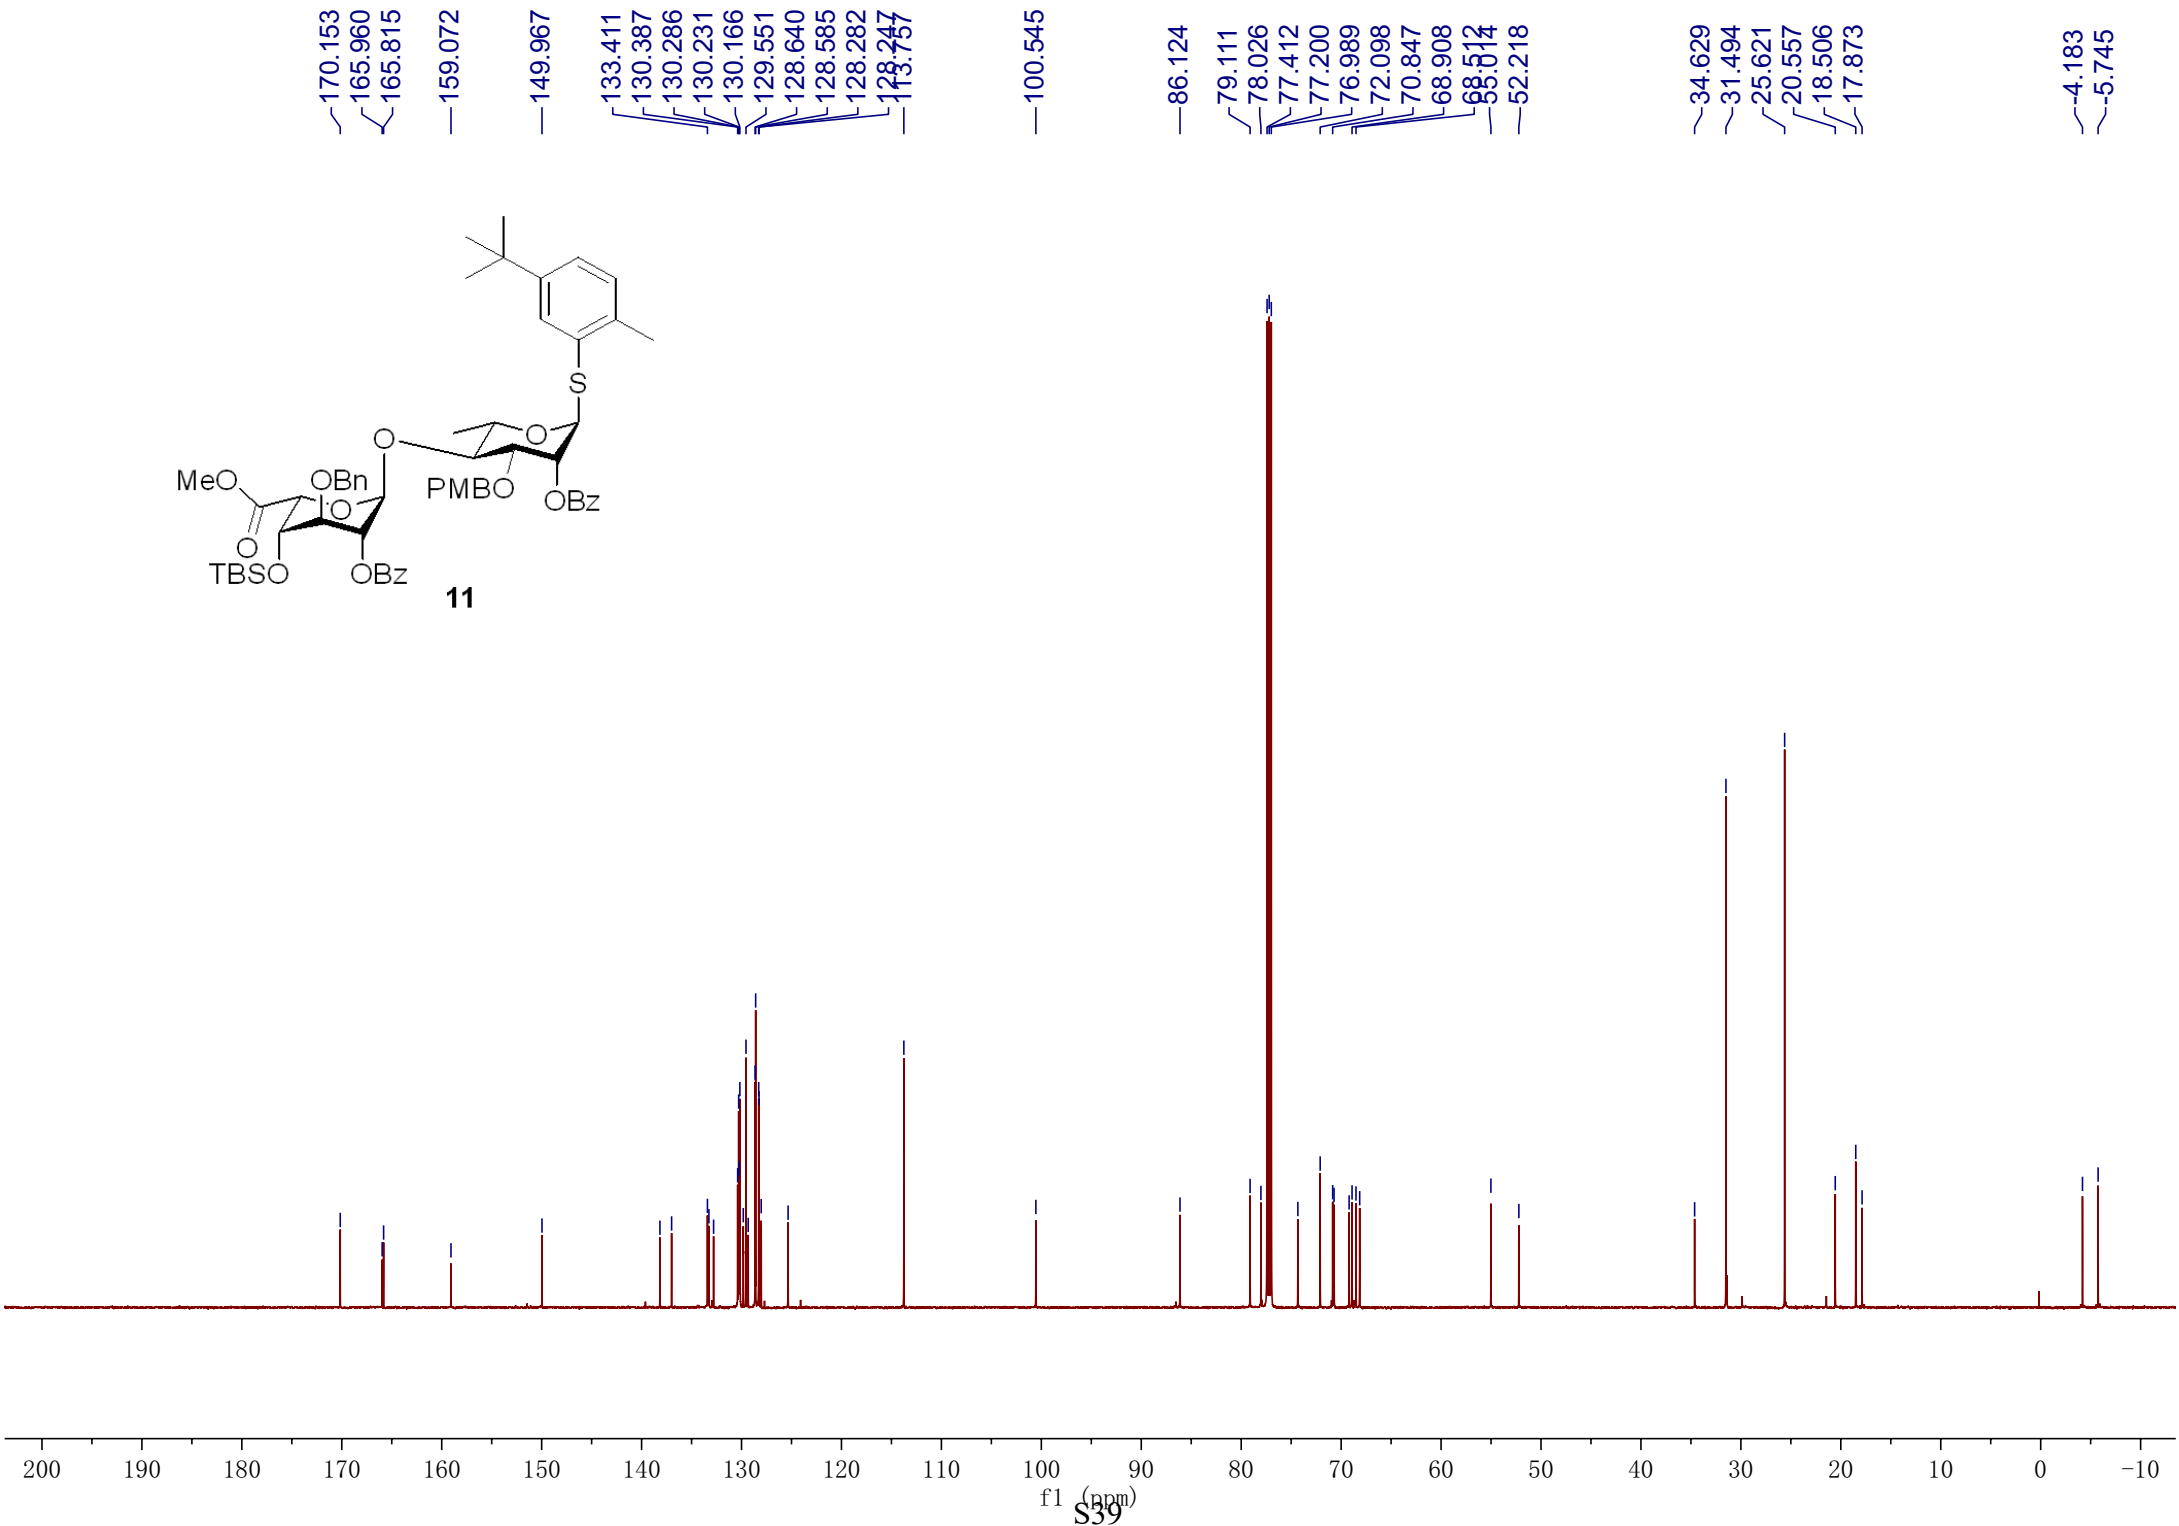

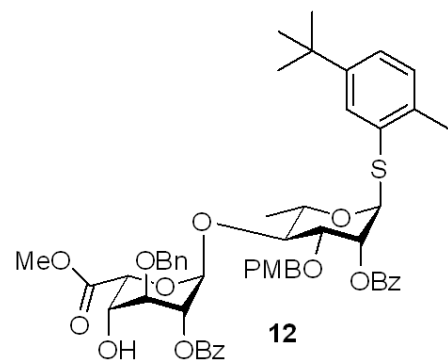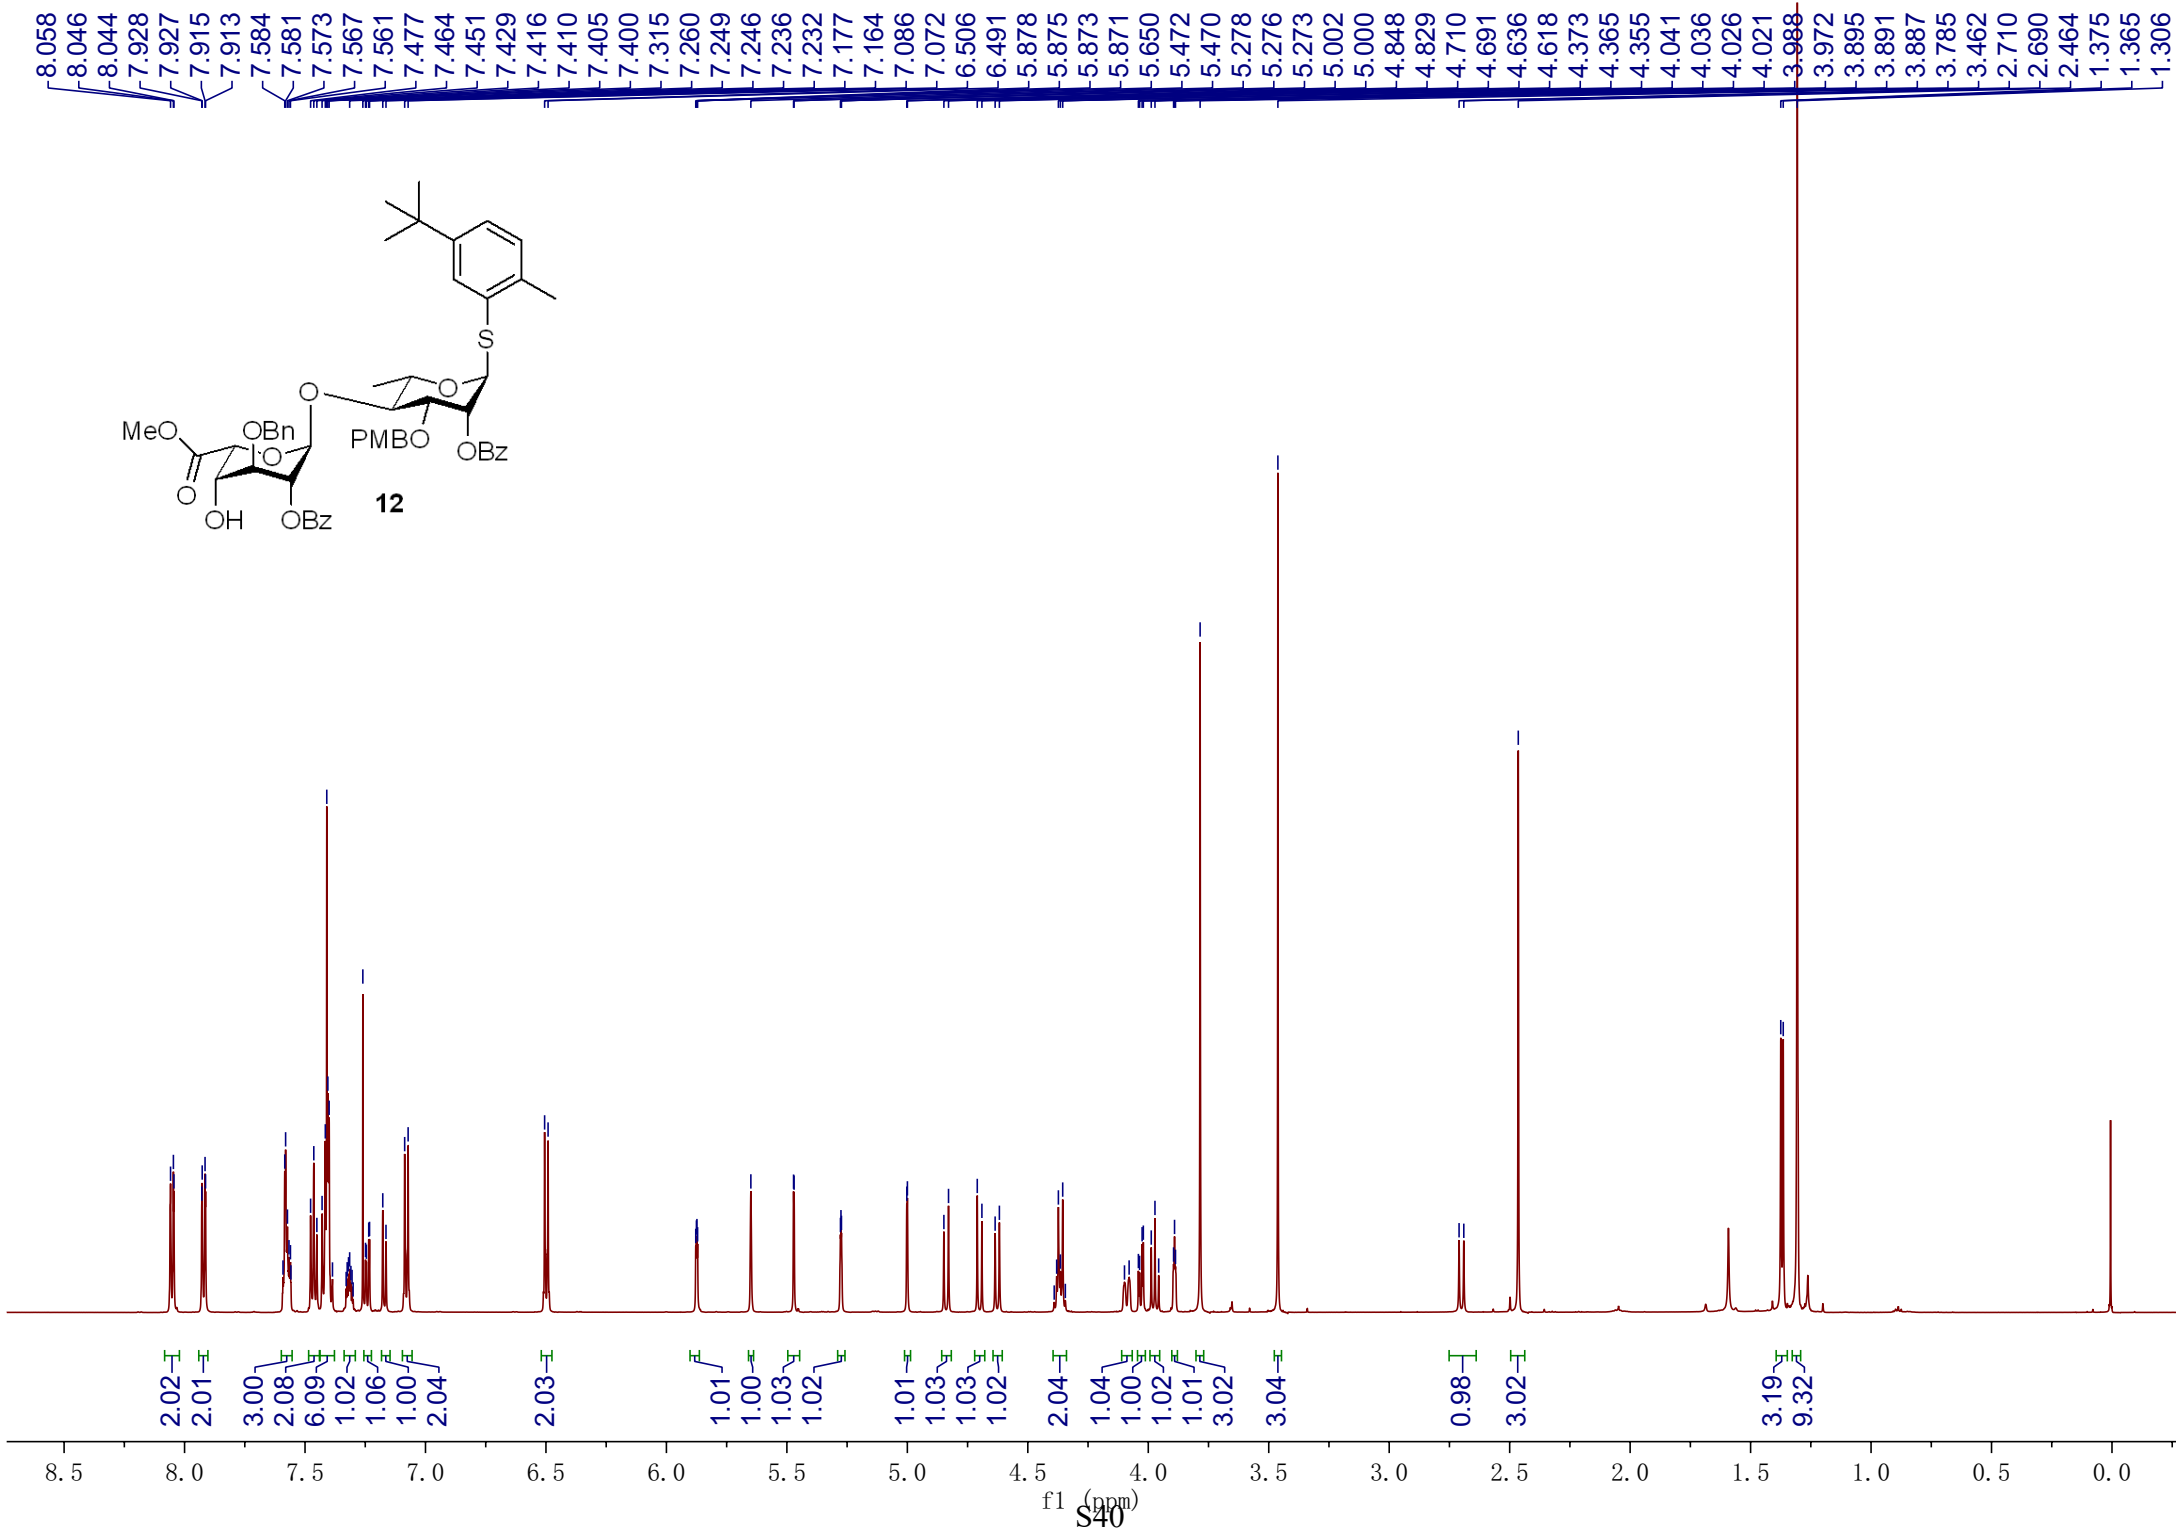



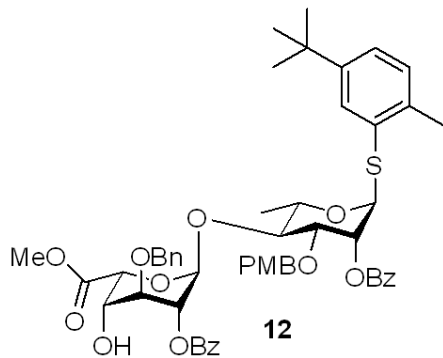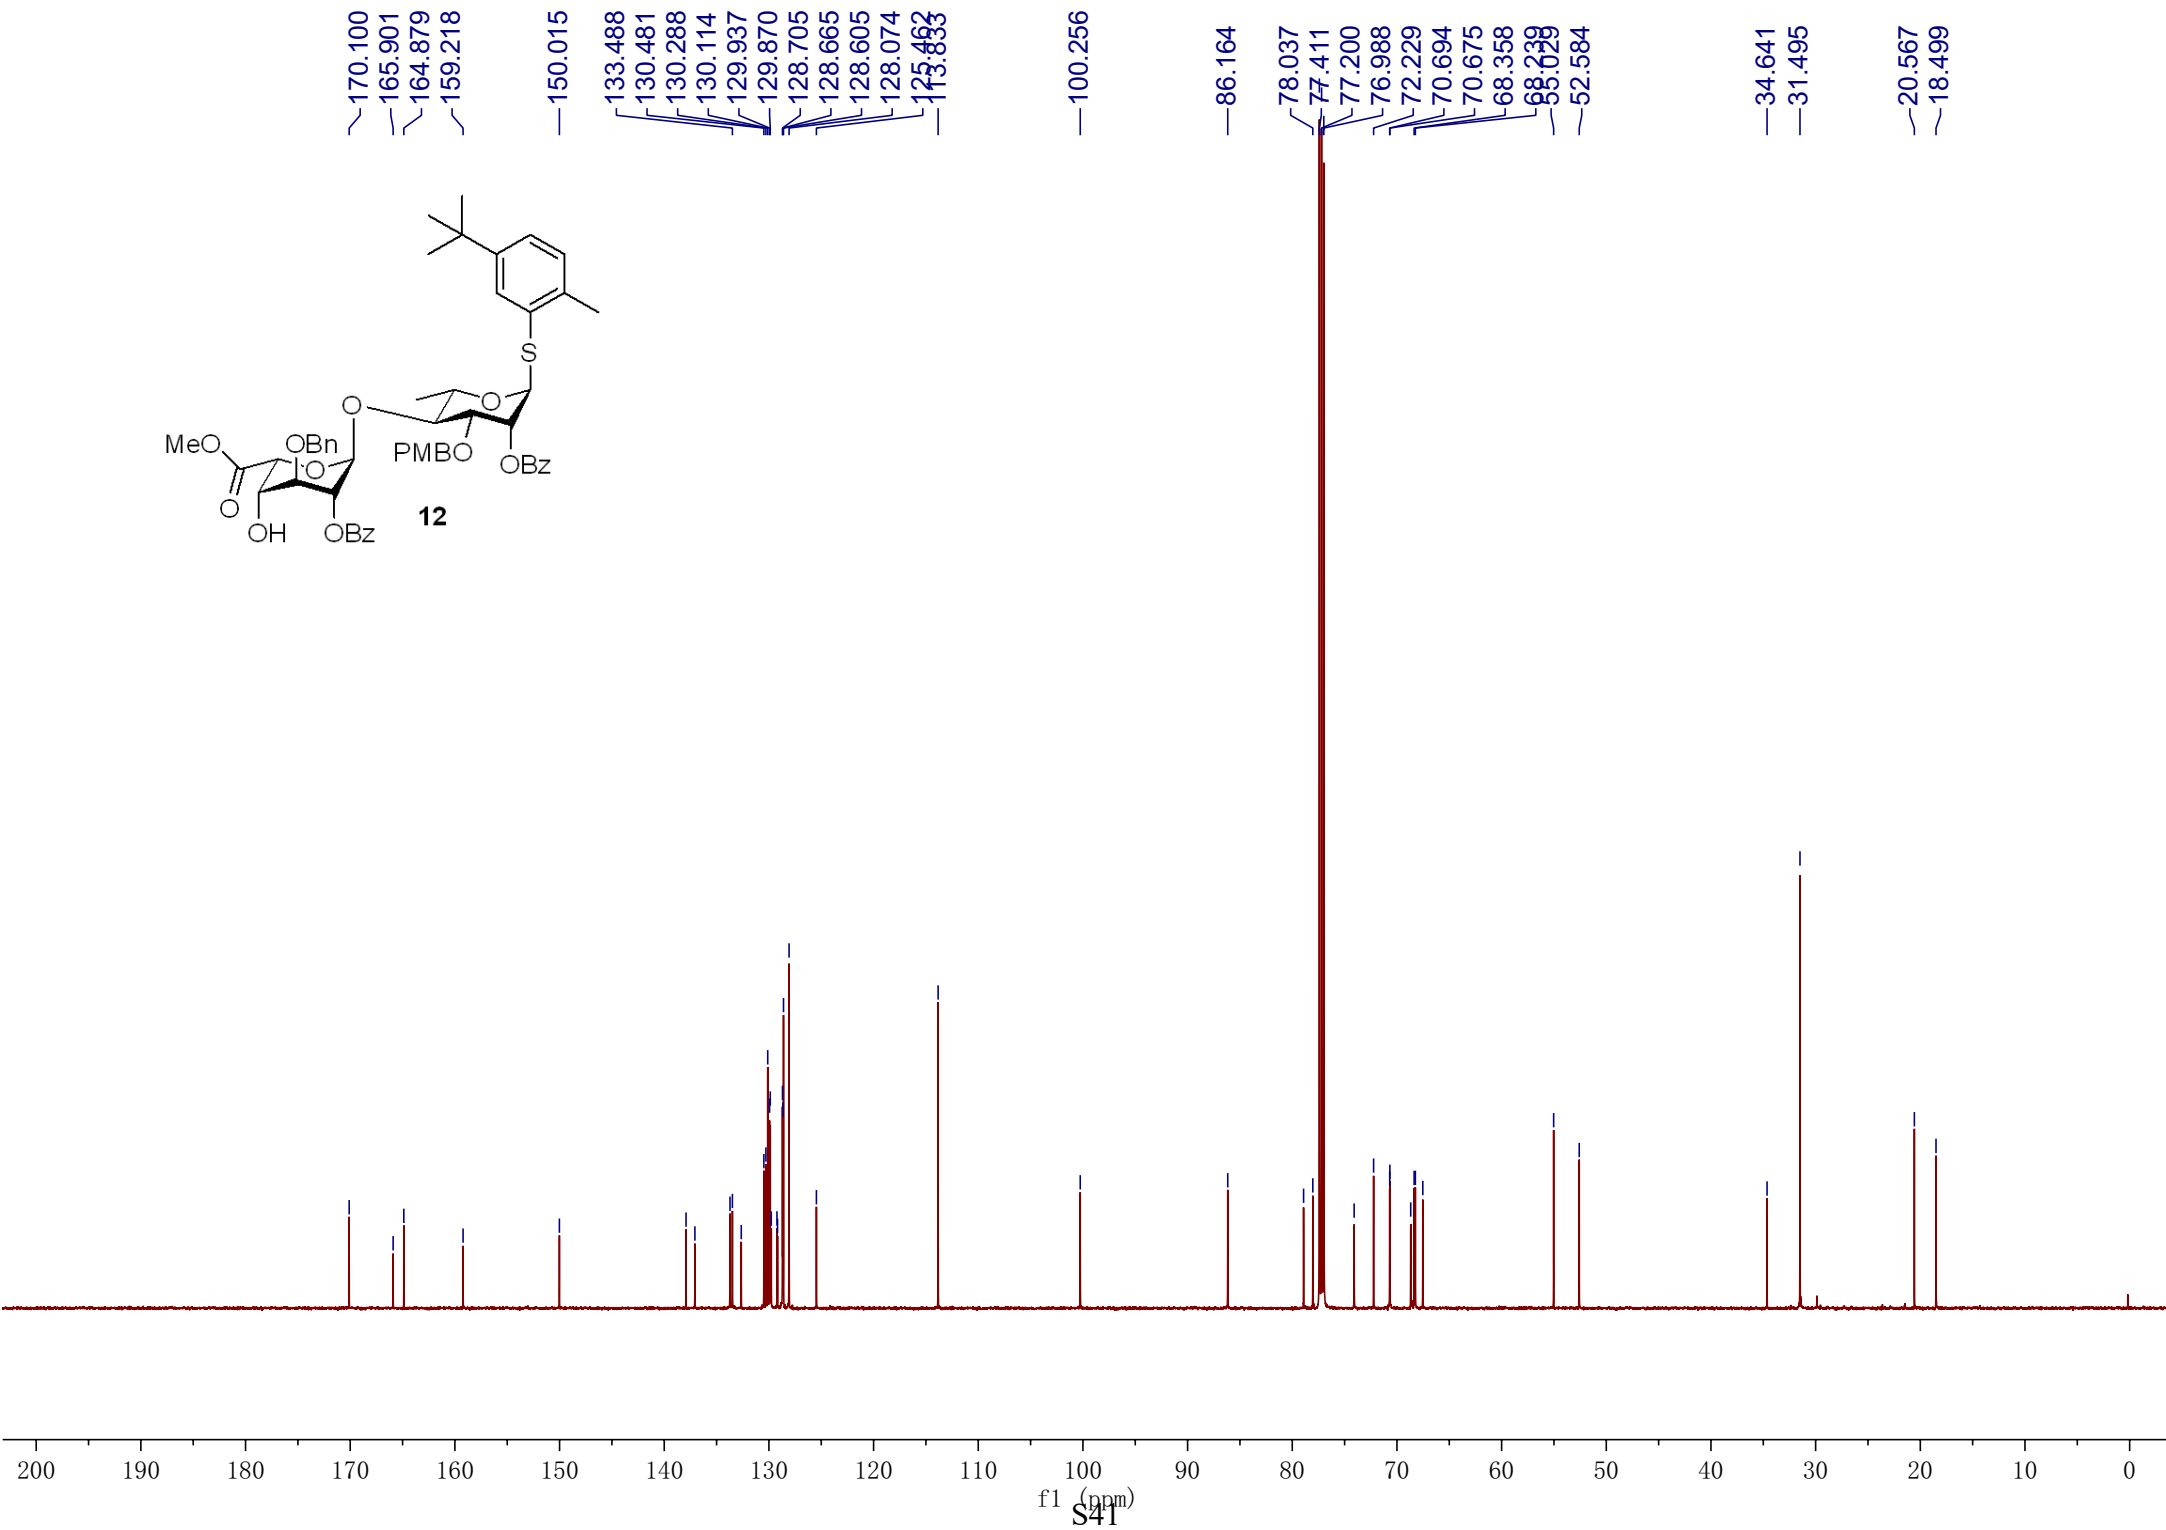

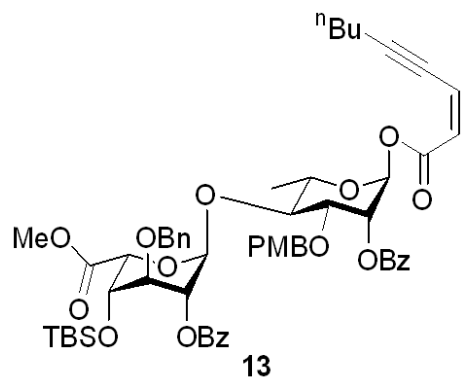

13

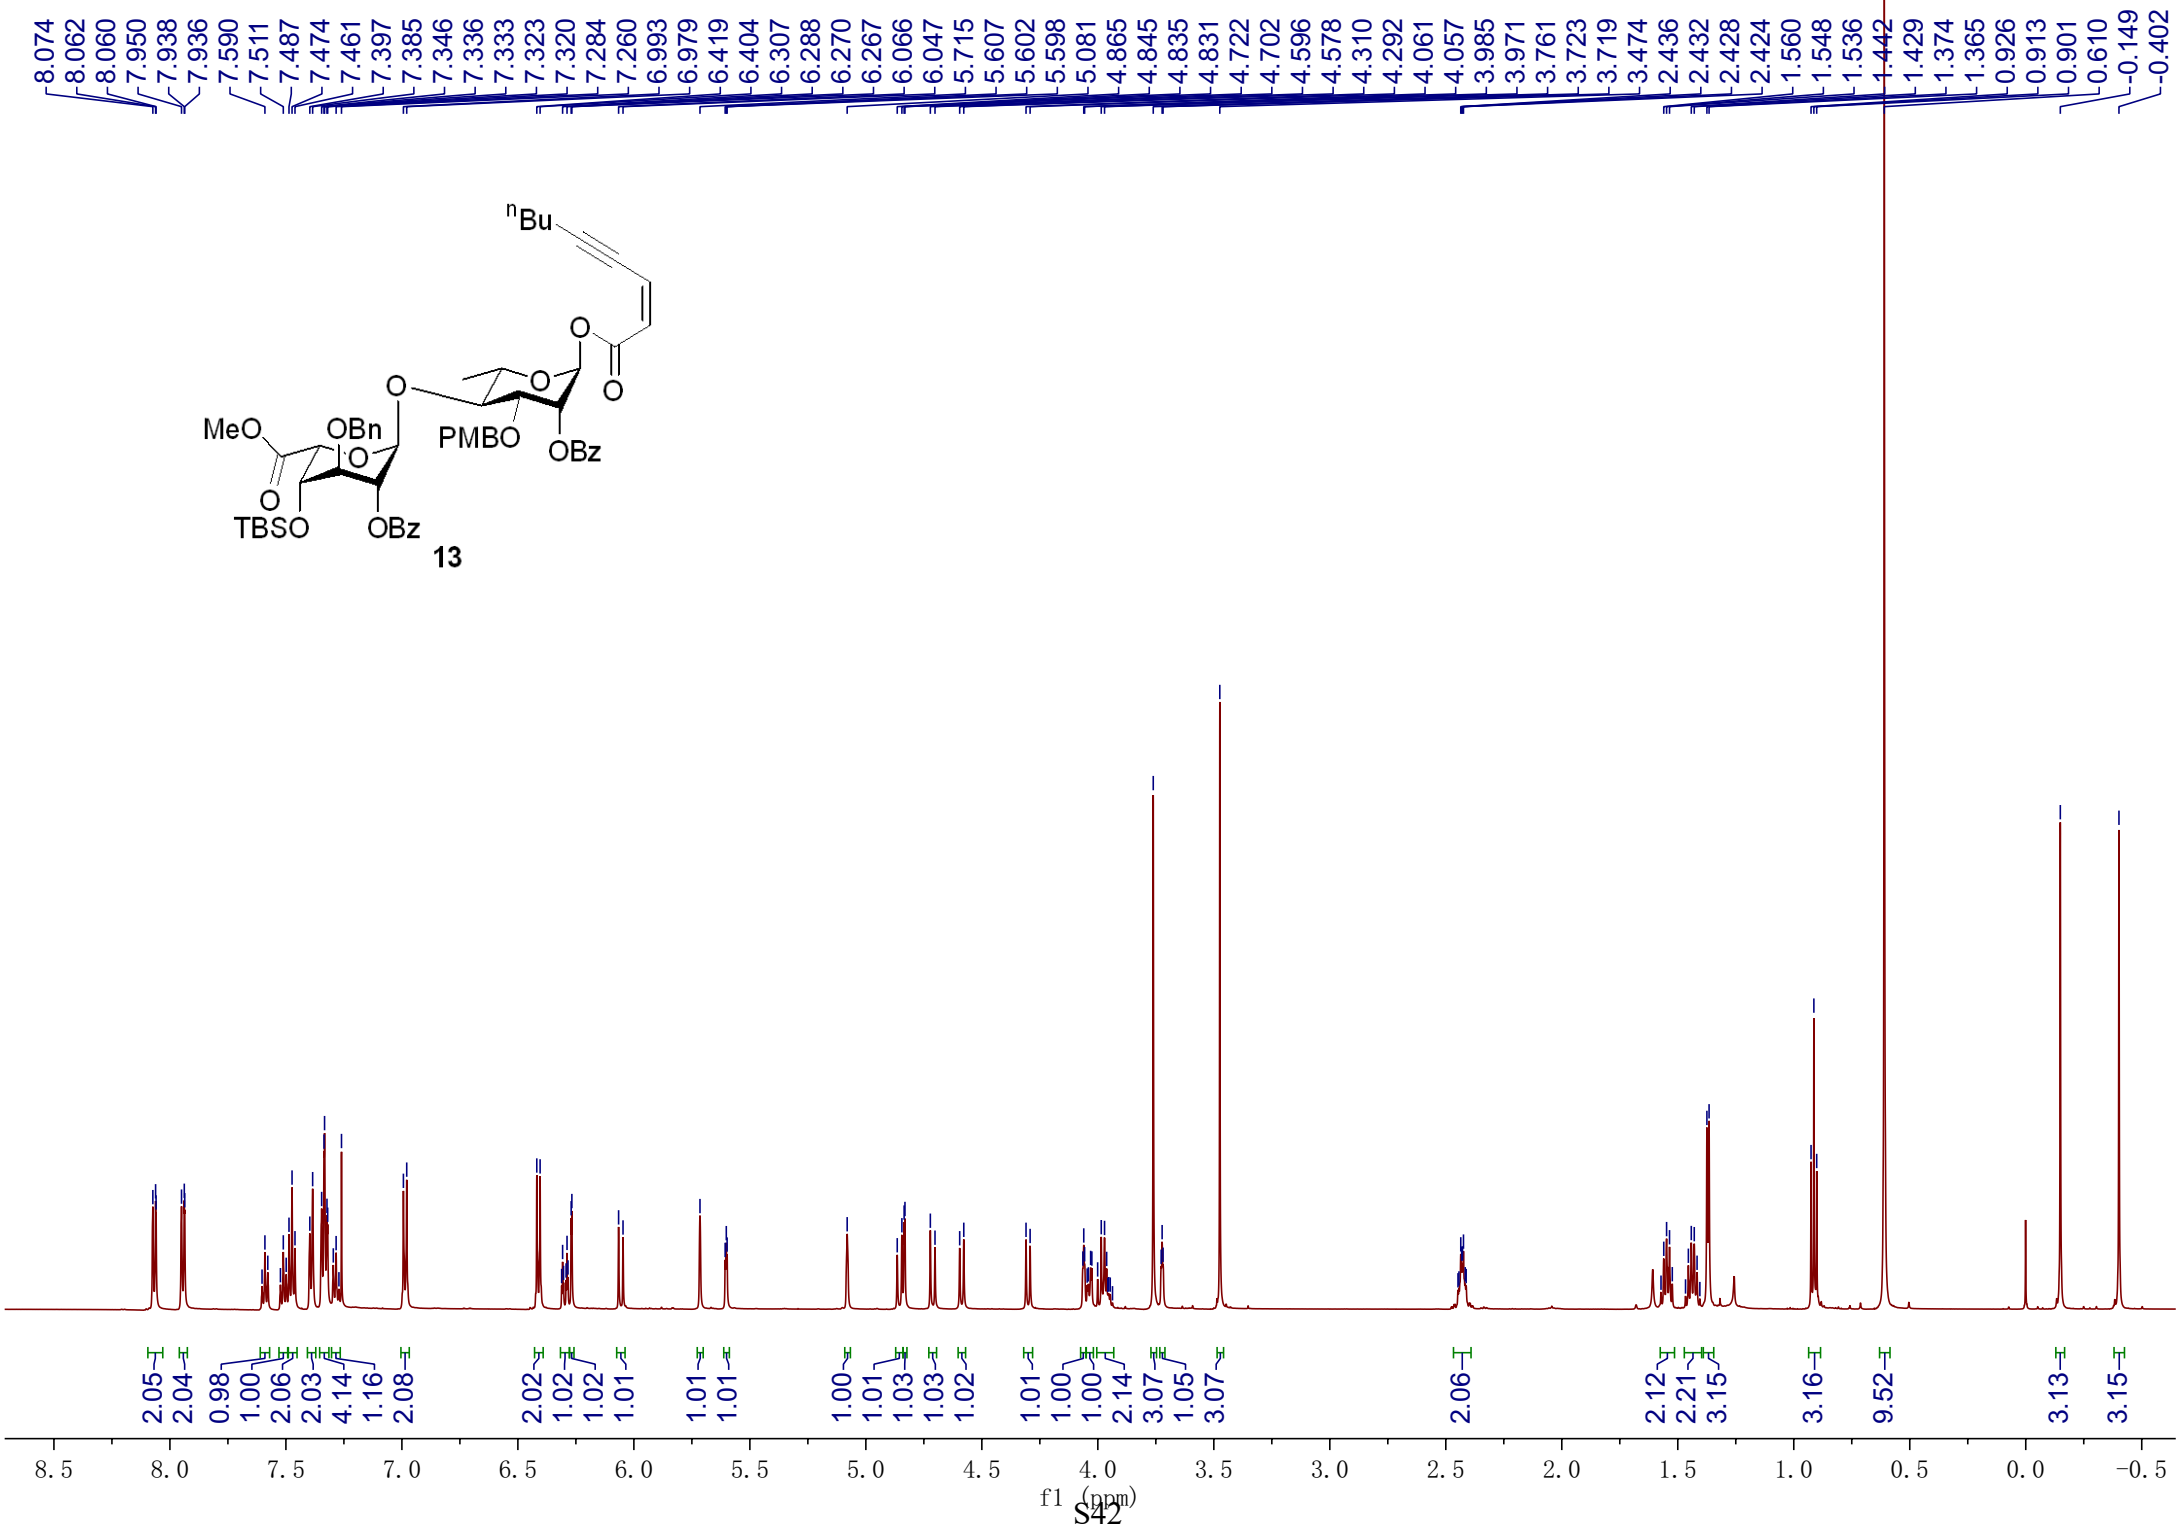

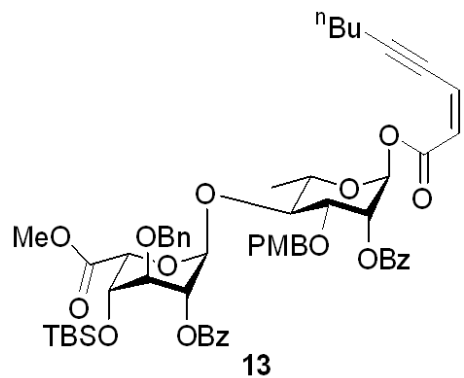

13

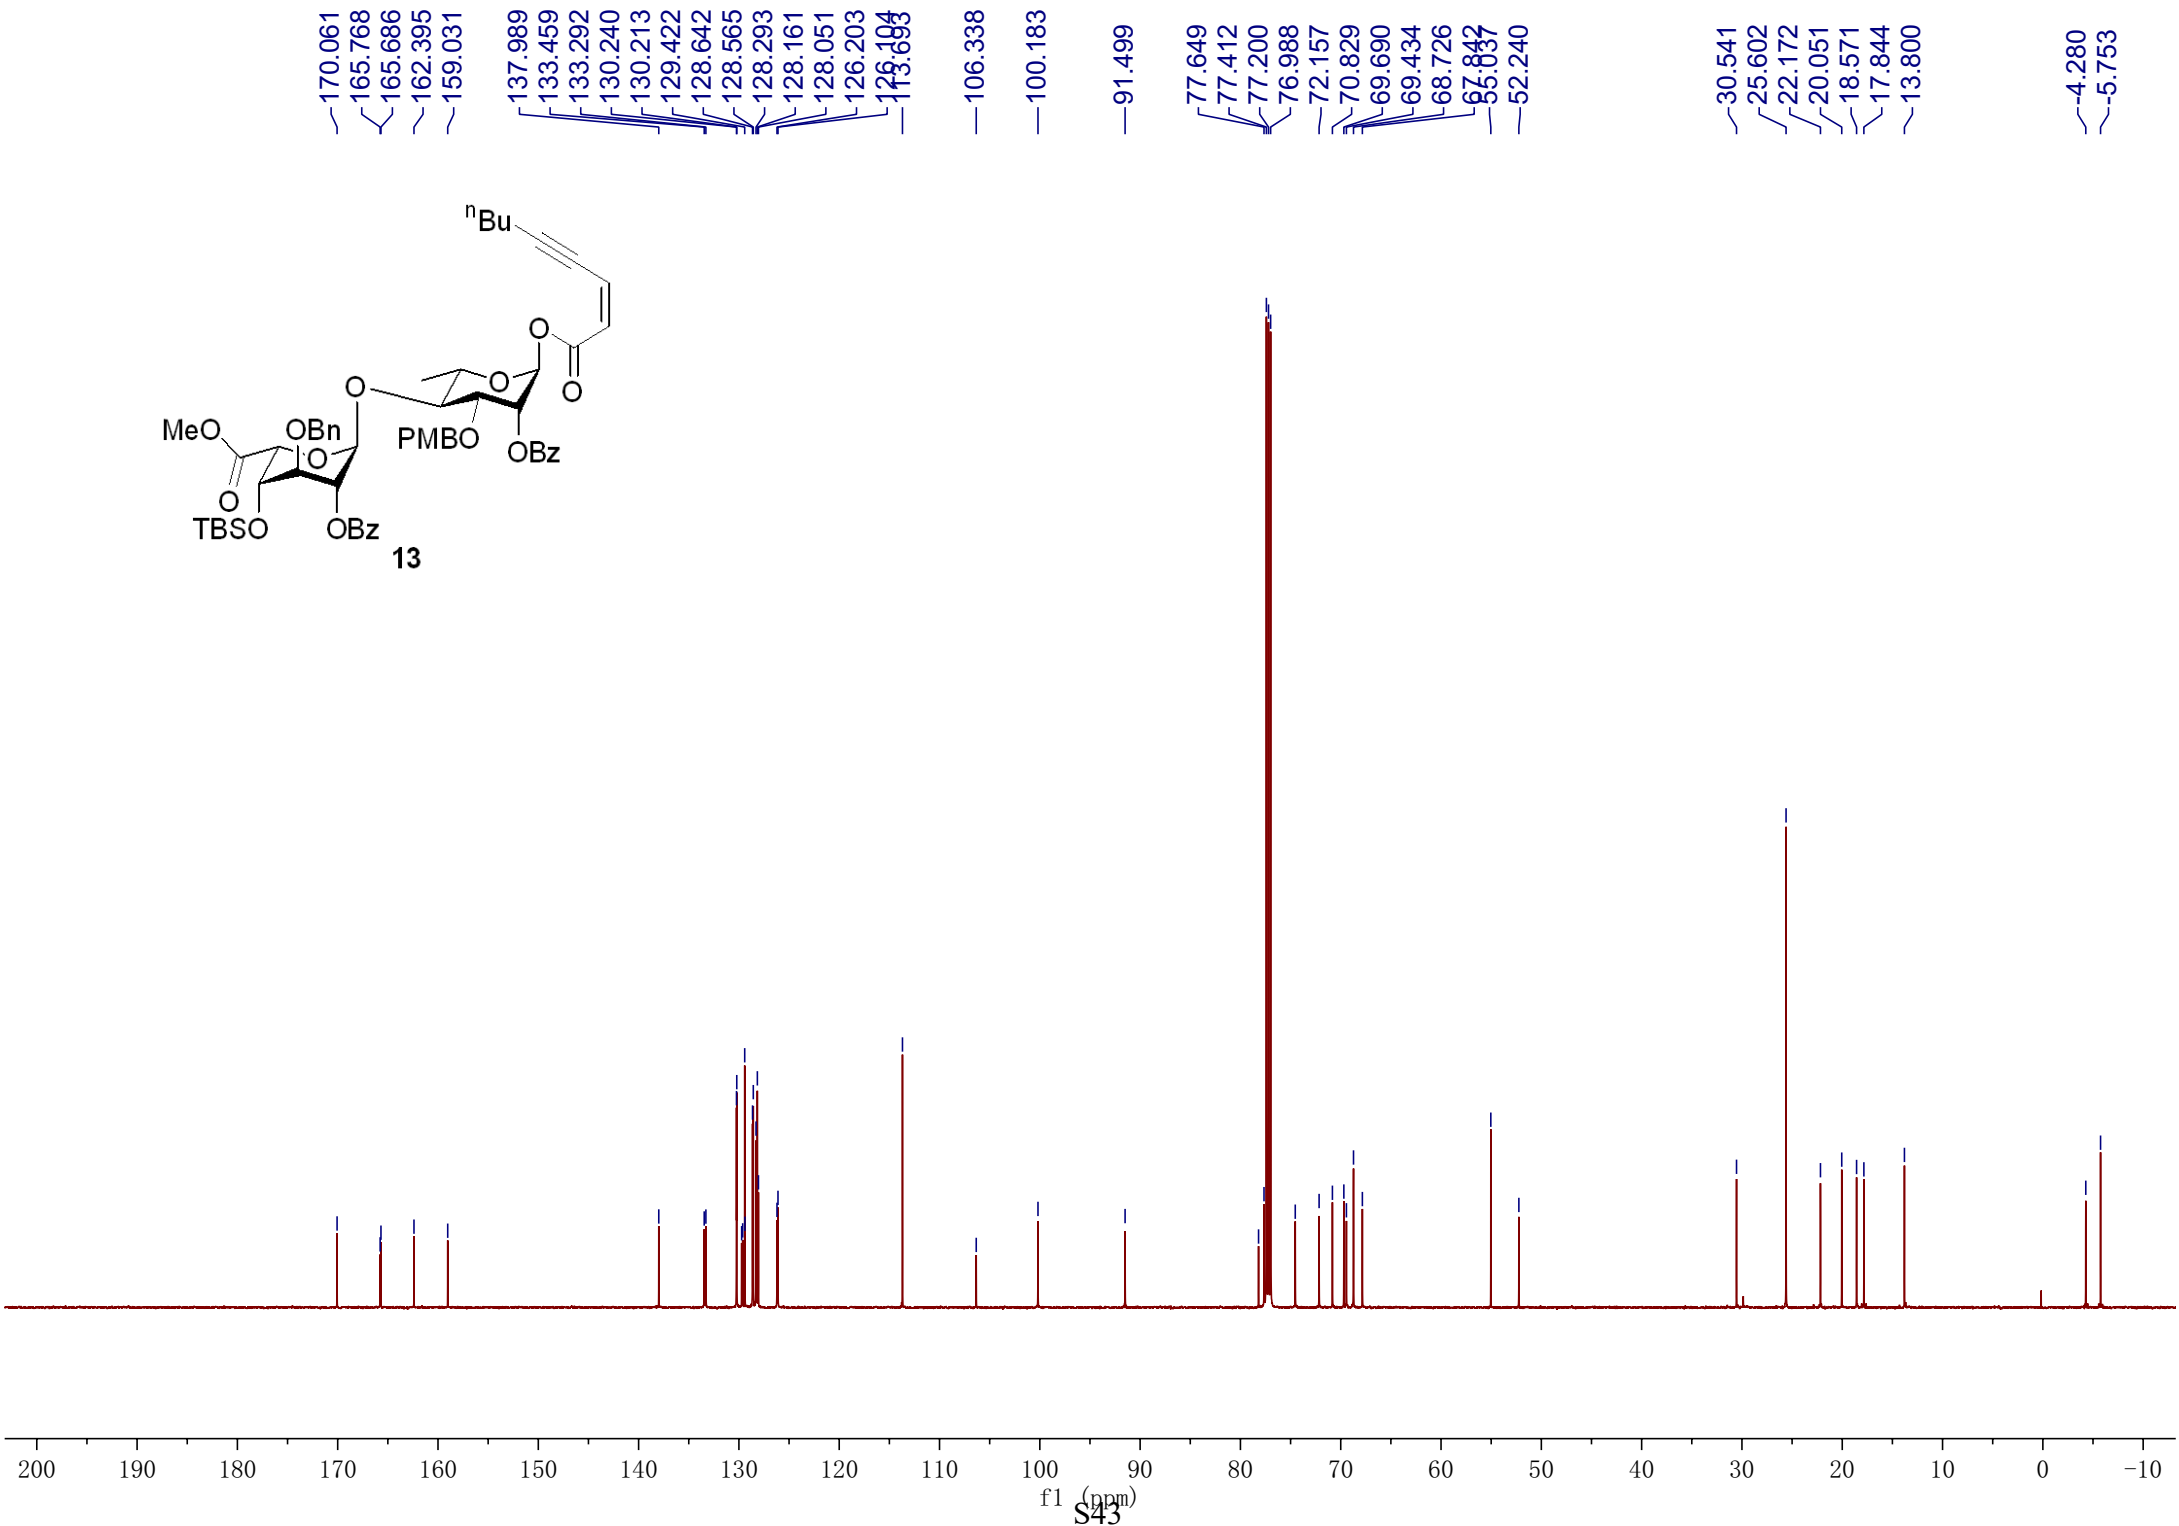

f1 (ppm)

S43







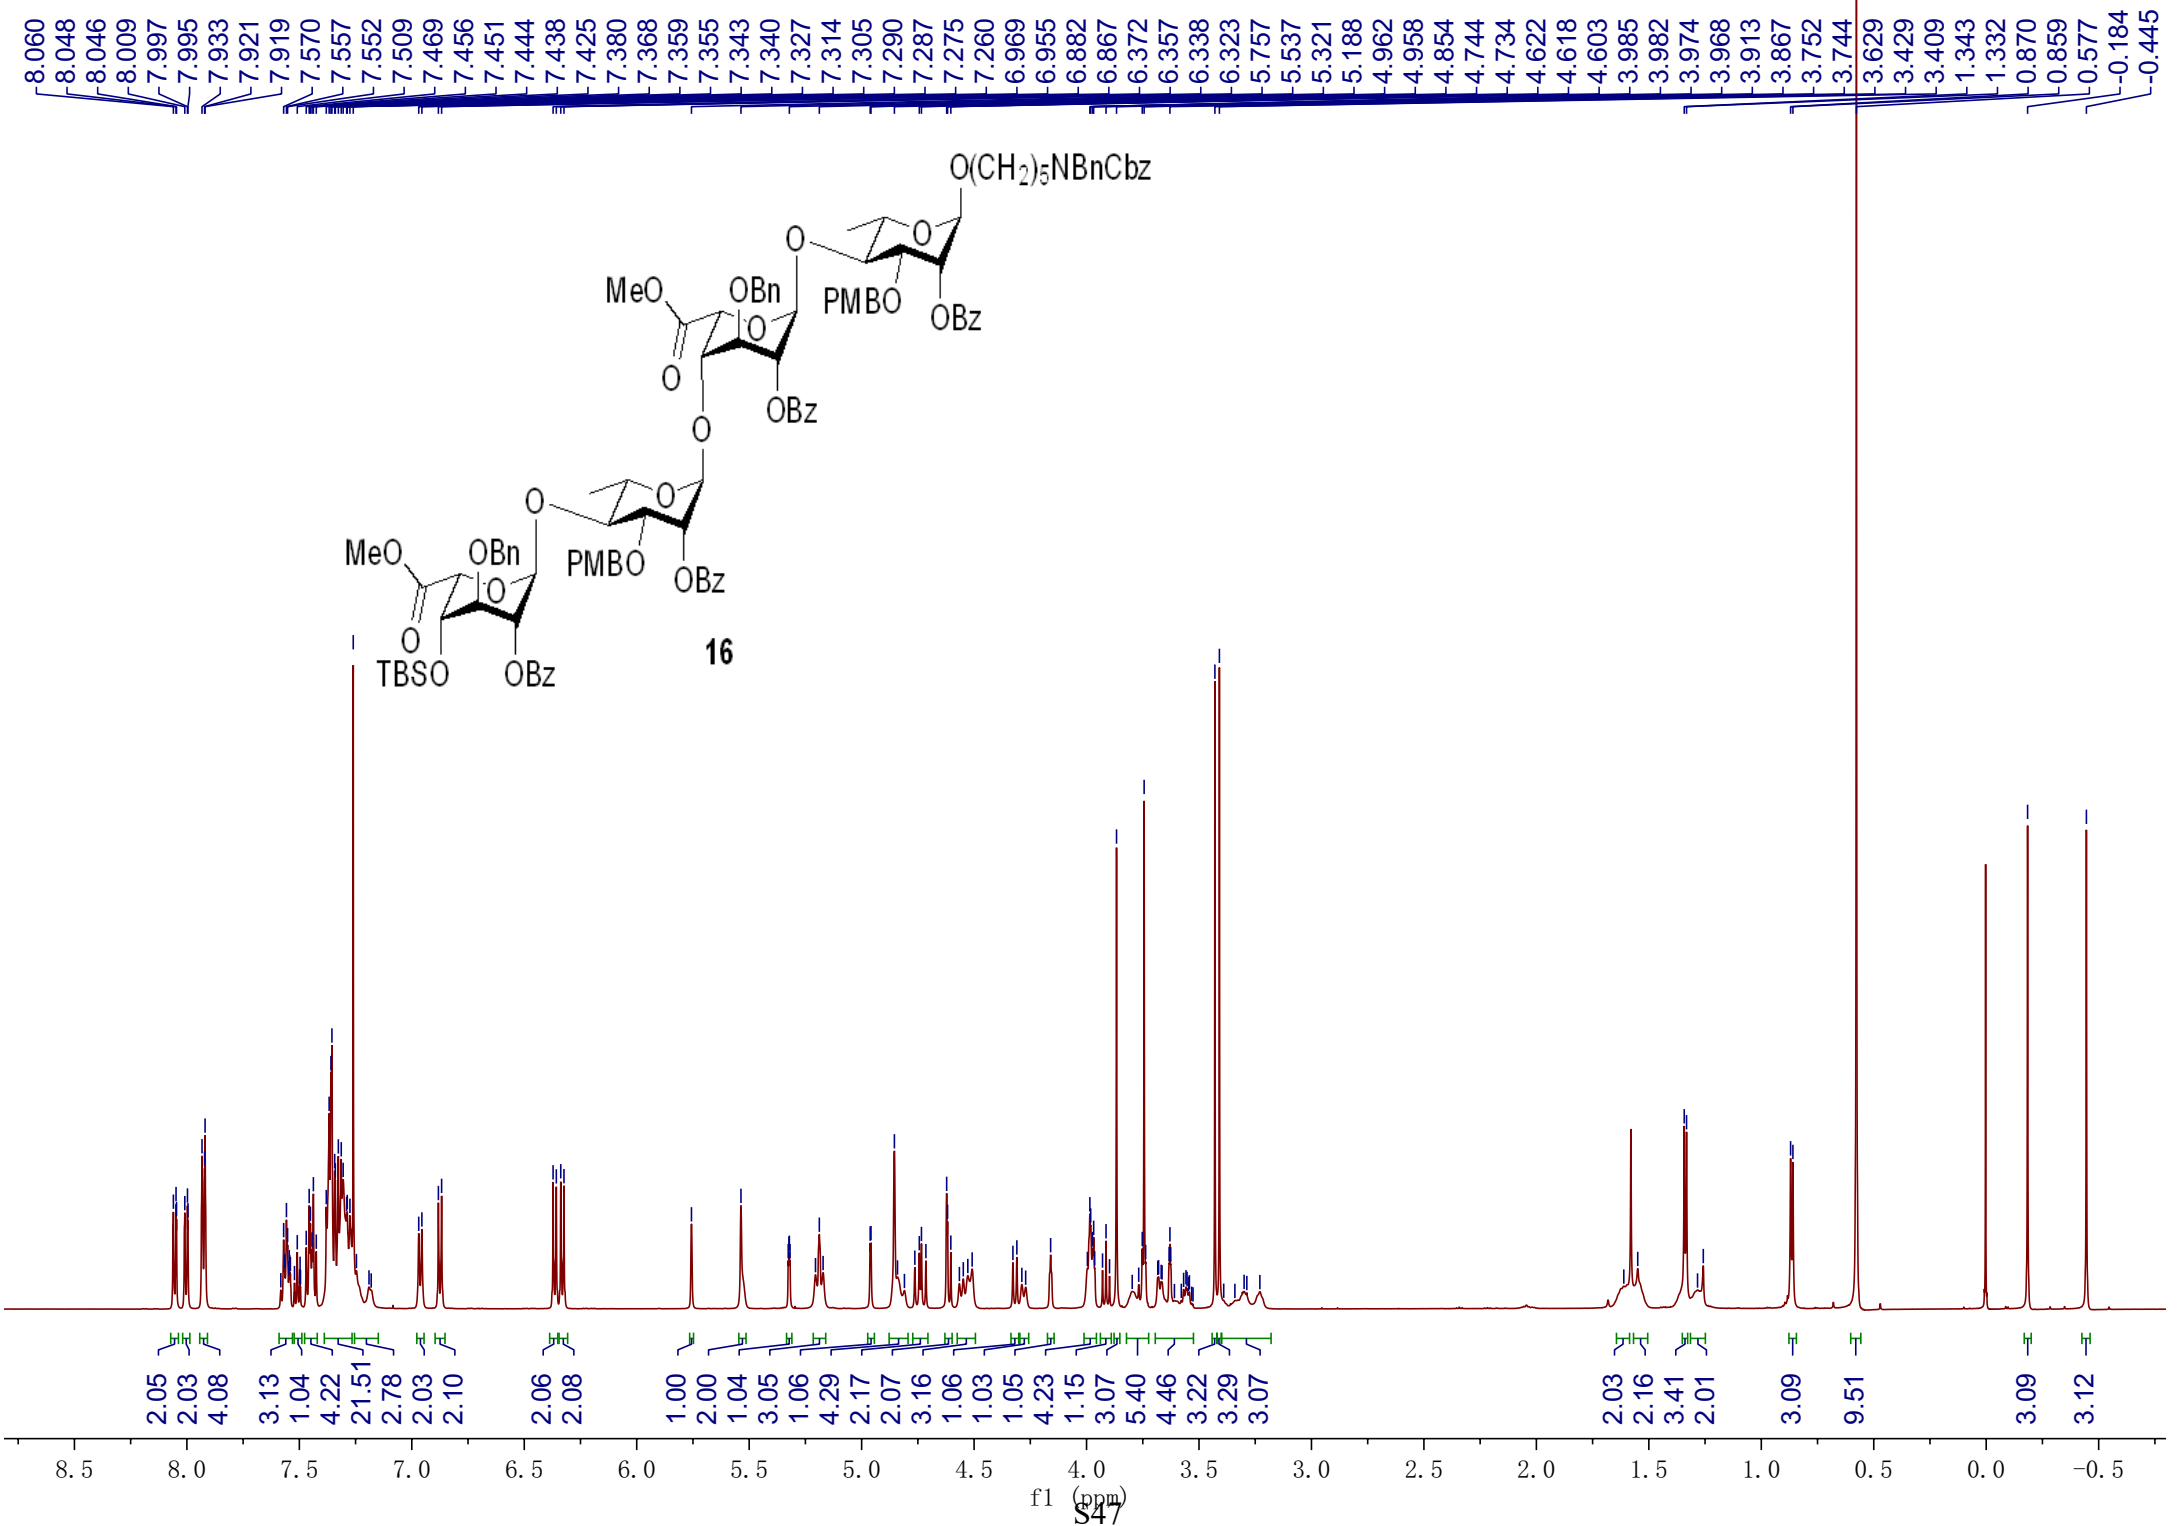





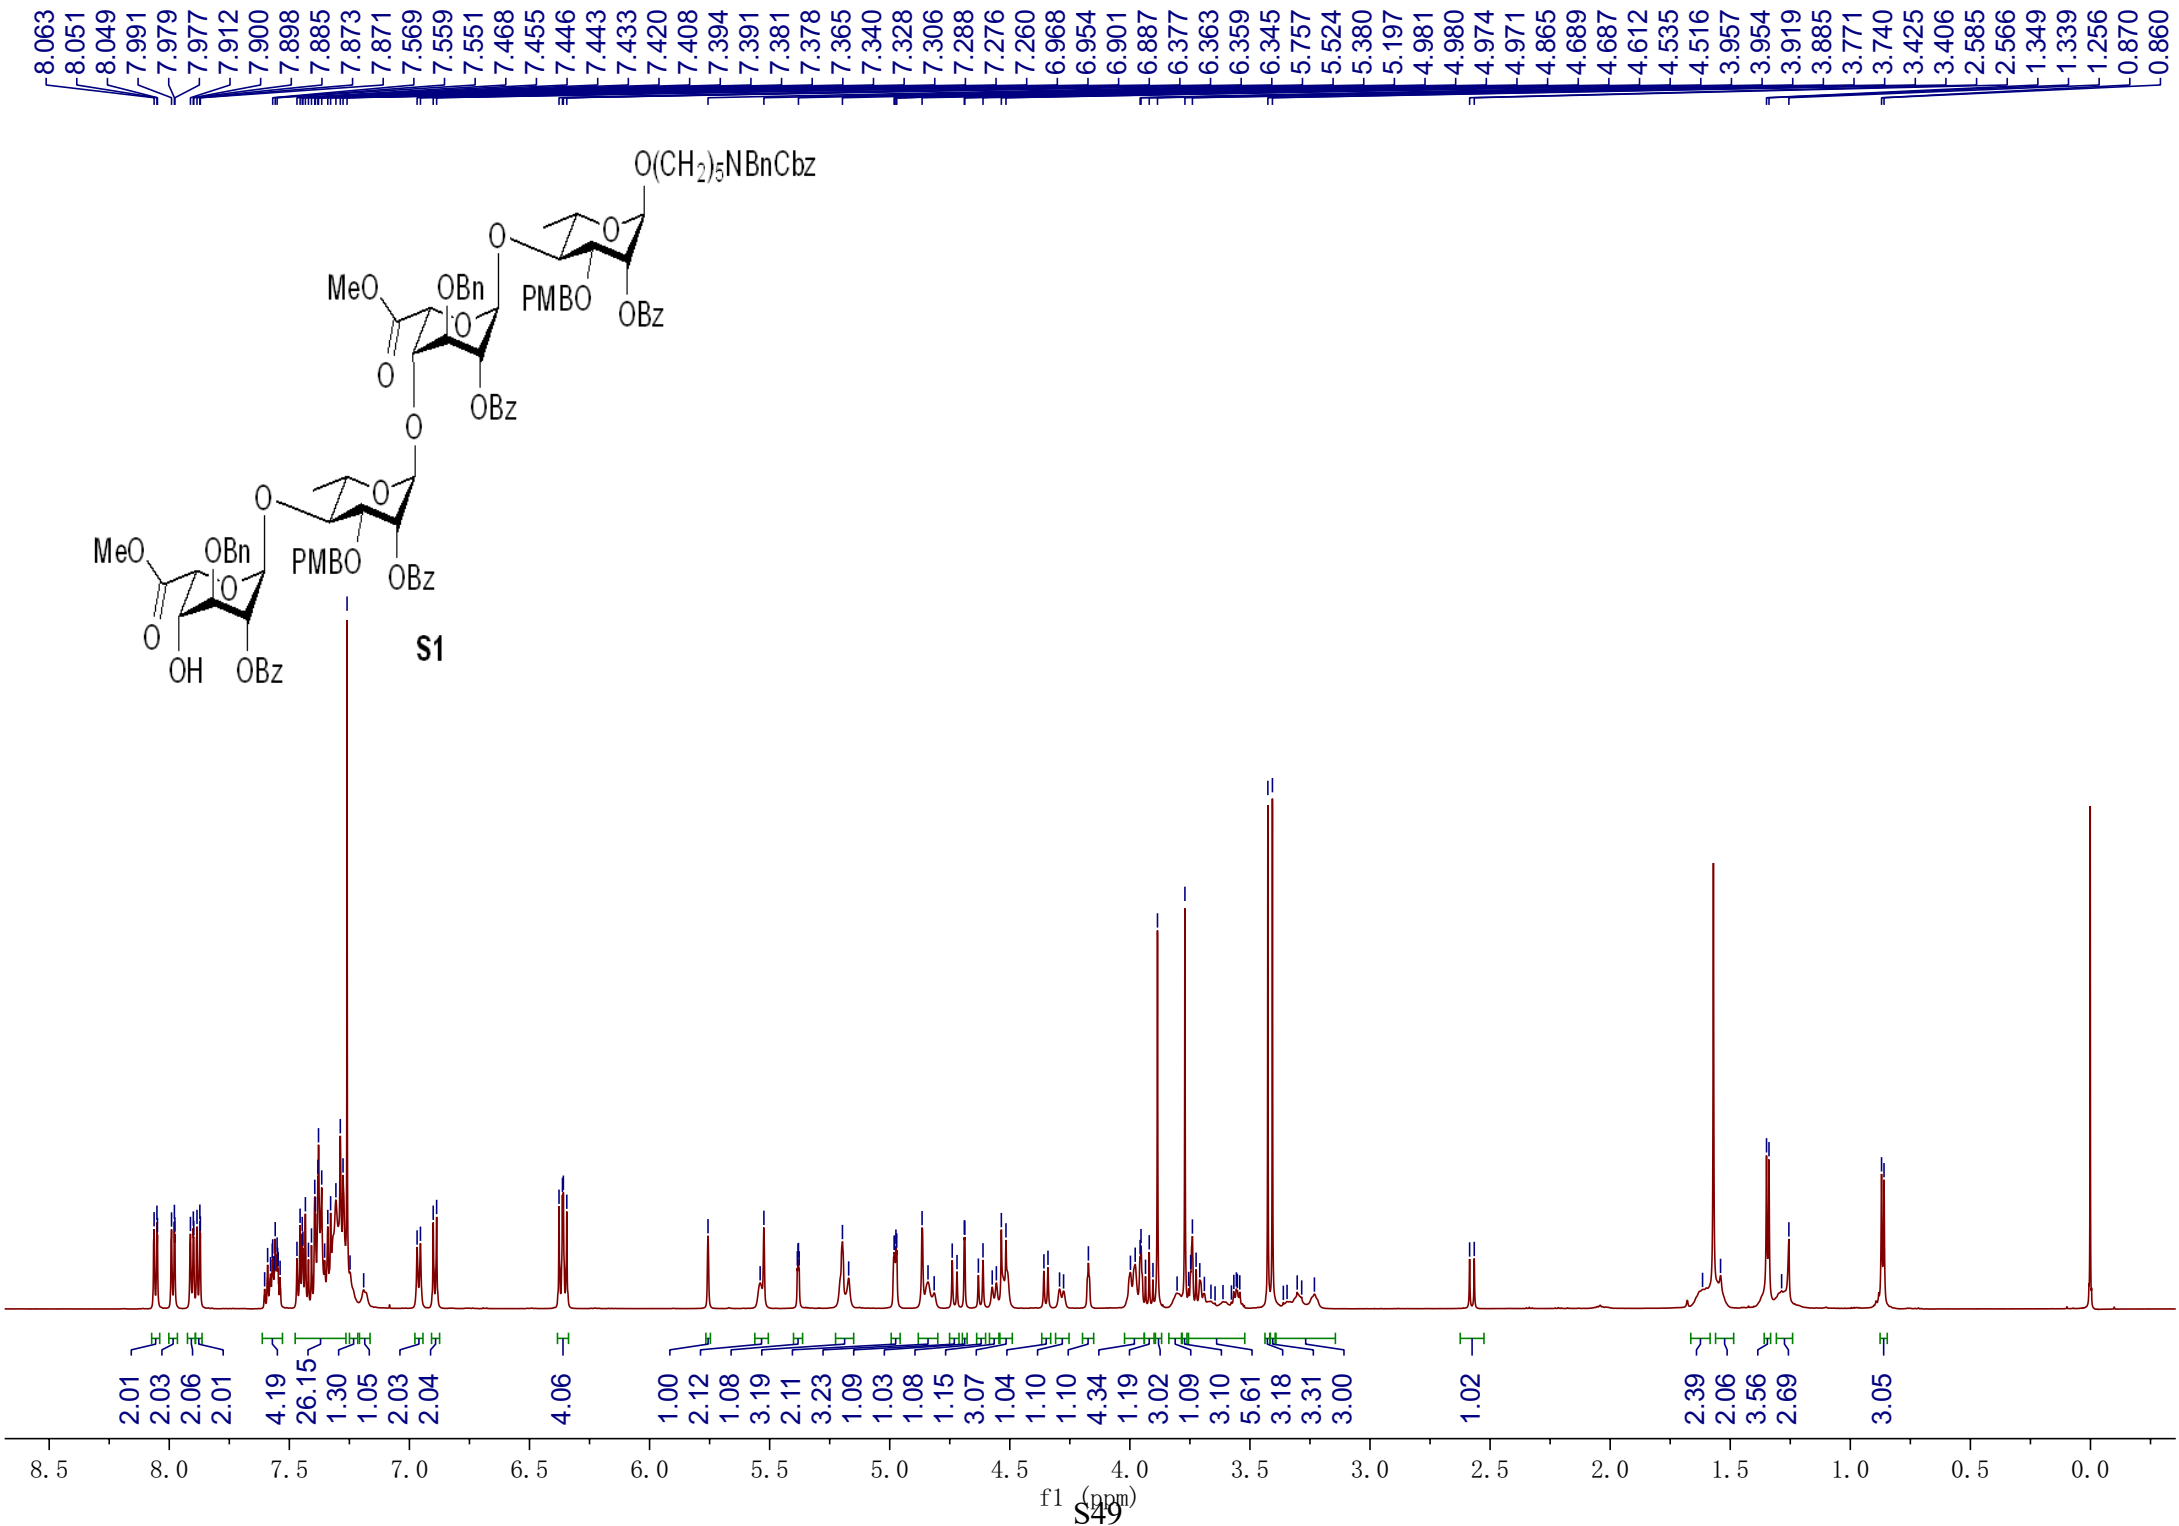

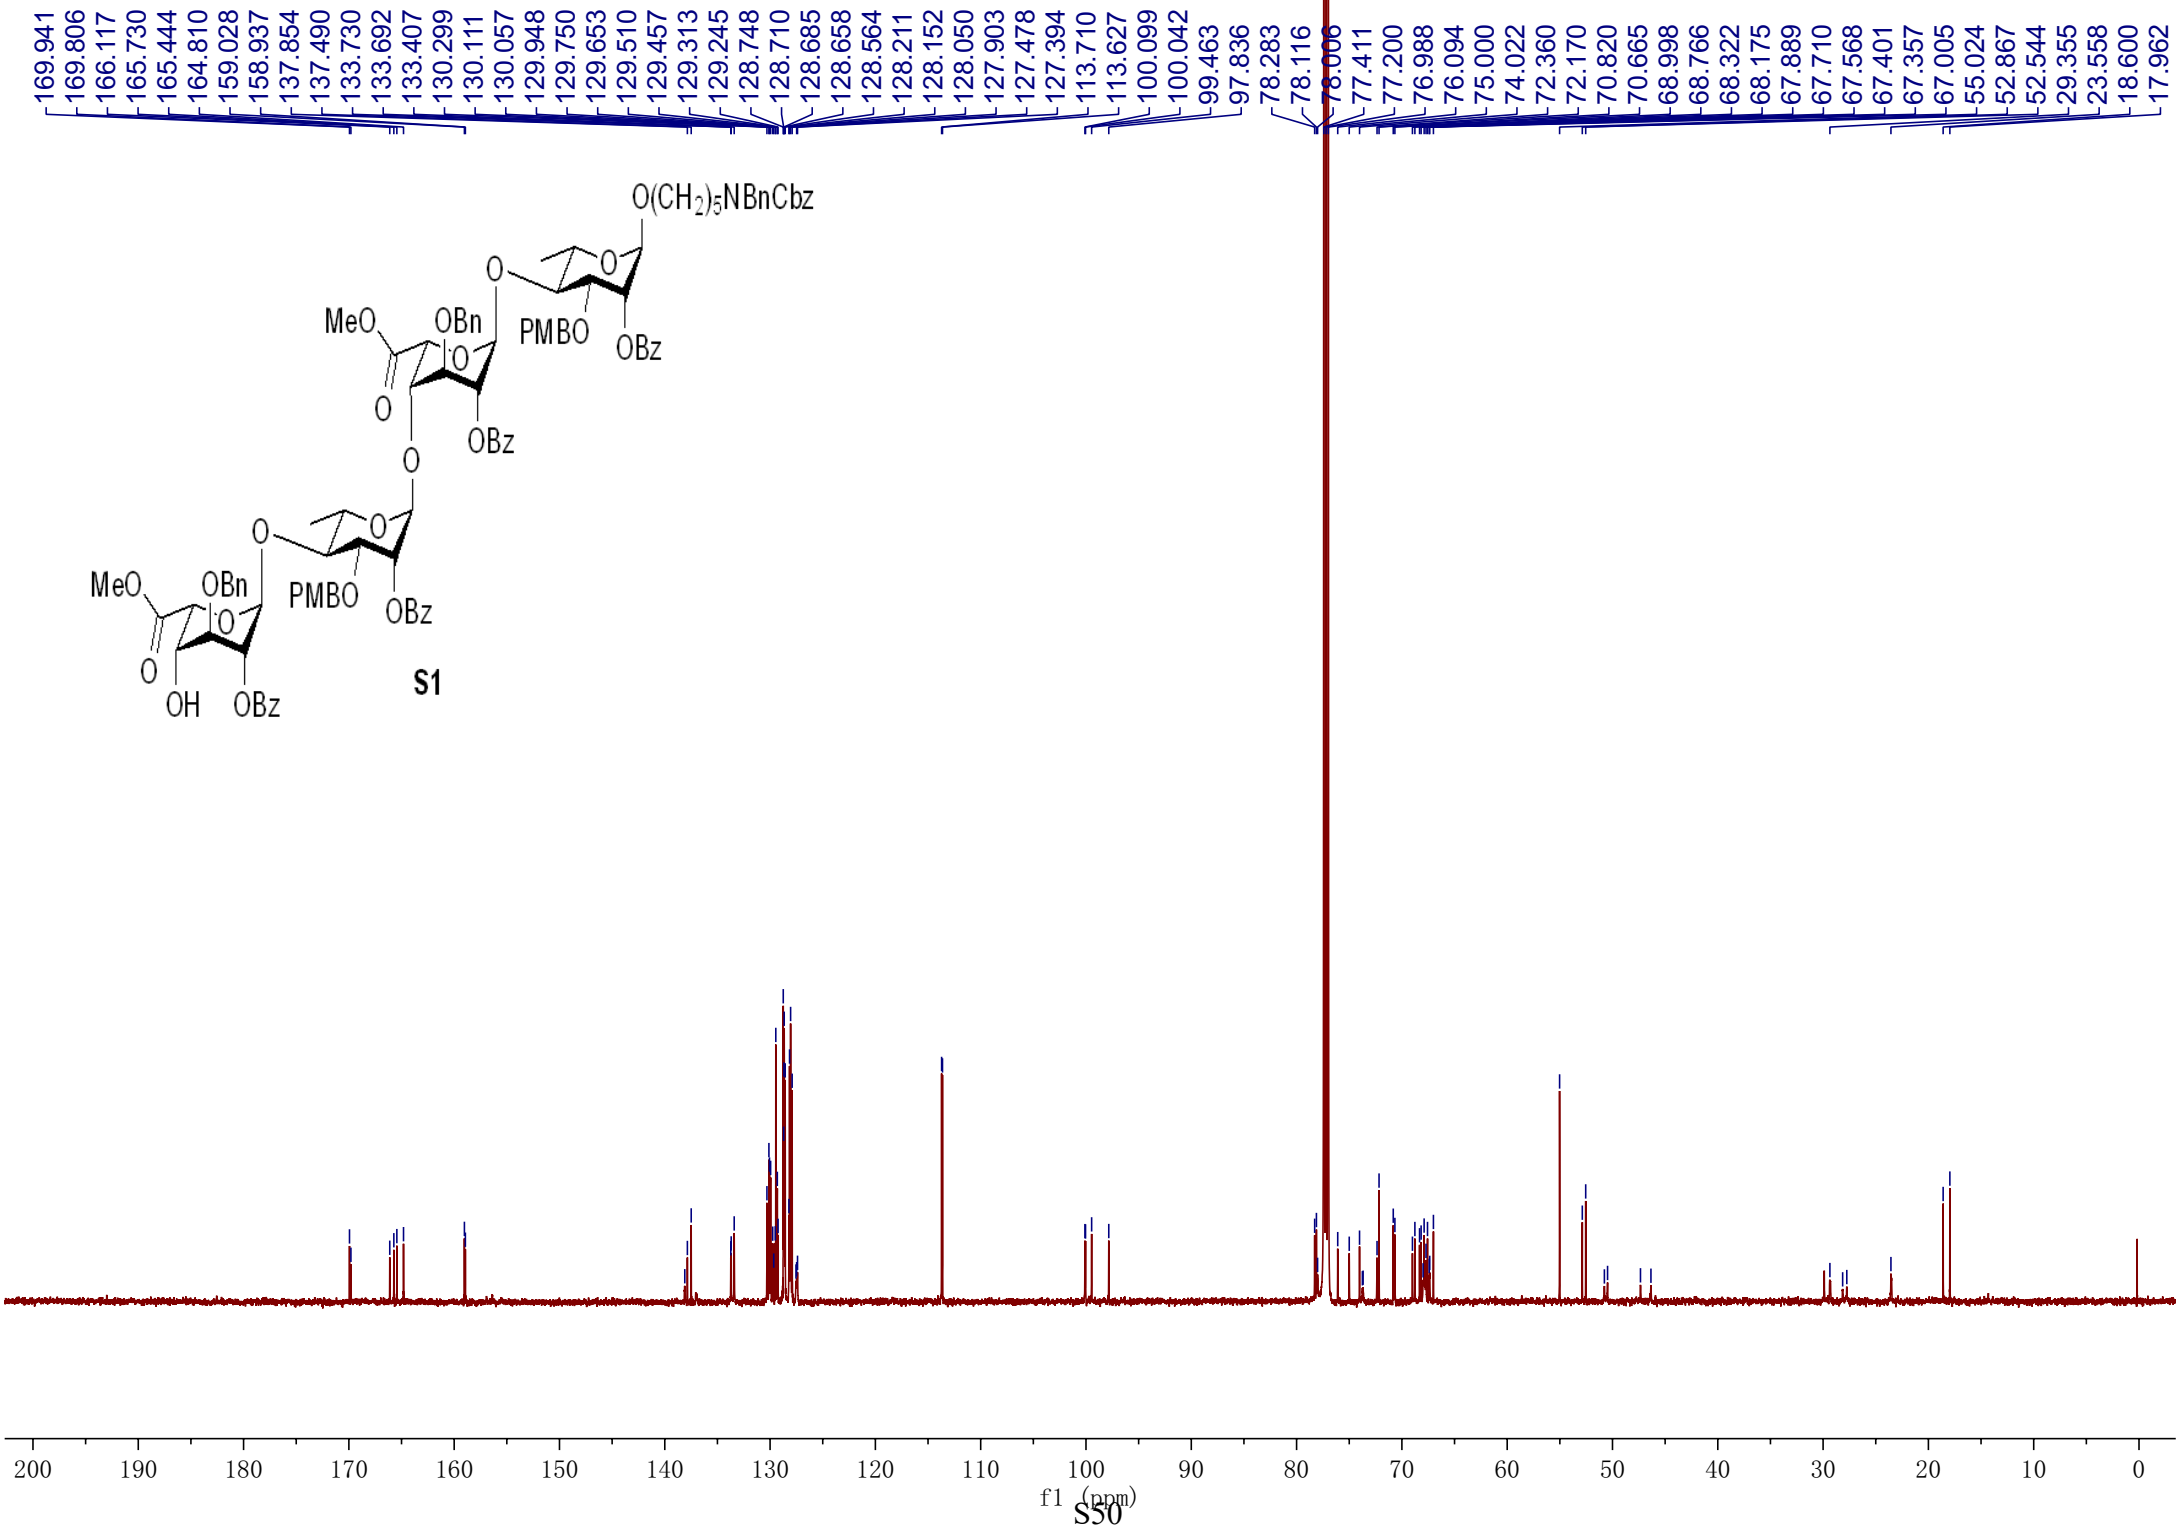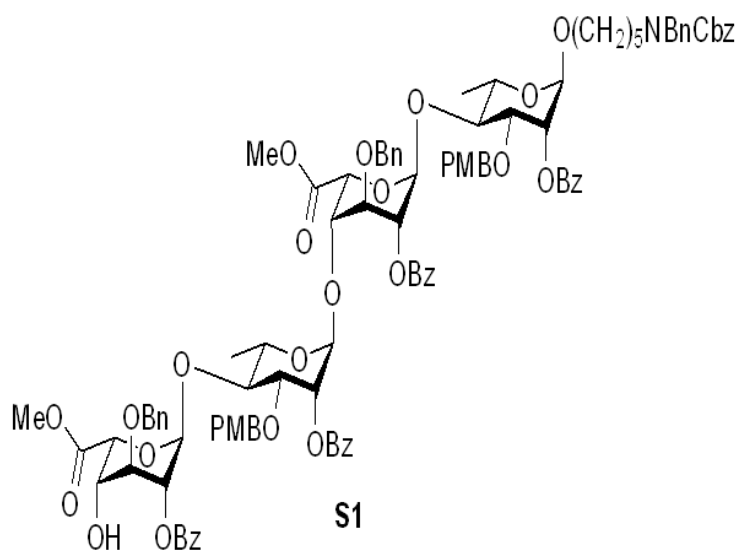

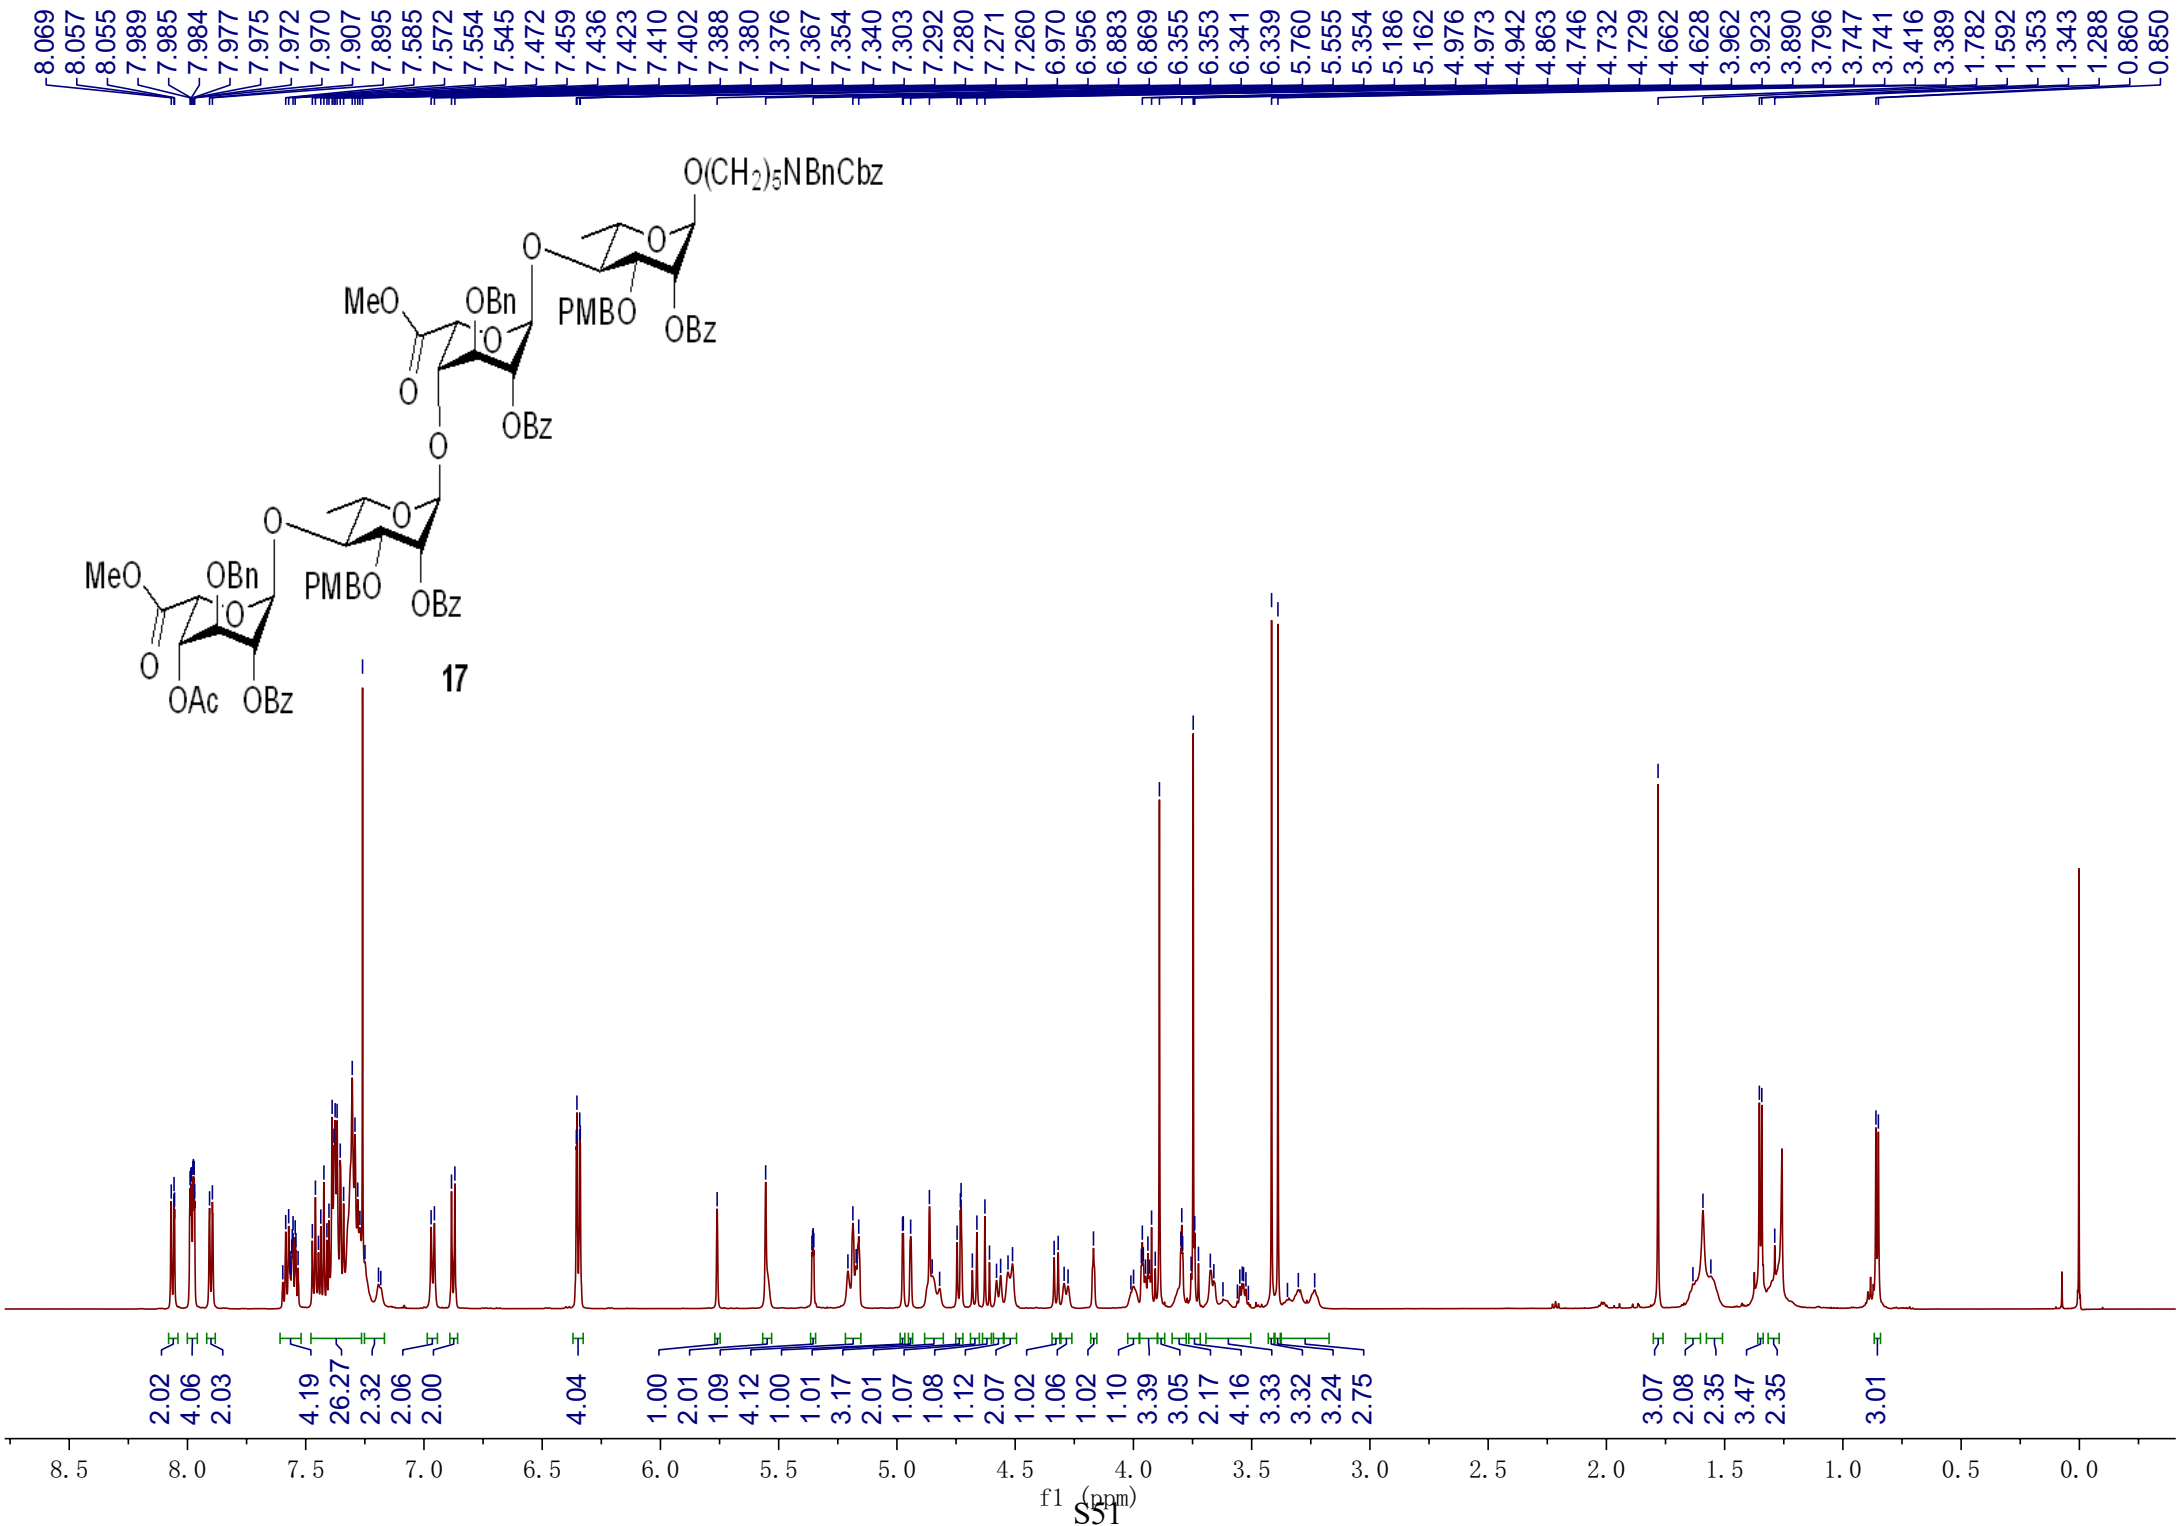

169.950  
169.801  
169.010  
166.117  
165.749  
165.464  
164.940  
158.965  
158.929  
137.861  
137.384  
133.731  
133.563  
133.388  
133.346  
130.303  
130.100  
130.056  
129.899  
129.756  
129.614  
129.558  
129.512  
129.409  
129.383  
129.314  
128.731  
128.717  
128.635  
128.622  
128.595  
128.547  
128.484  
128.153  
128.033  
128.004  
127.878  
127.379  
113.658  
113.619  
100.180  
100.040  
99.286  
97.827  
78.240  
78.120  
77.412  
77.200  
76.988  
75.956  
75.031  
72.426  
72.312  
71.996  
70.793  
70.676  
68.985  
68.861  
68.141  
67.897  
67.668  
67.050  
67.002  
66.198  
54.993  
52.865  
52.609  
20.702  
18.589  
17.897

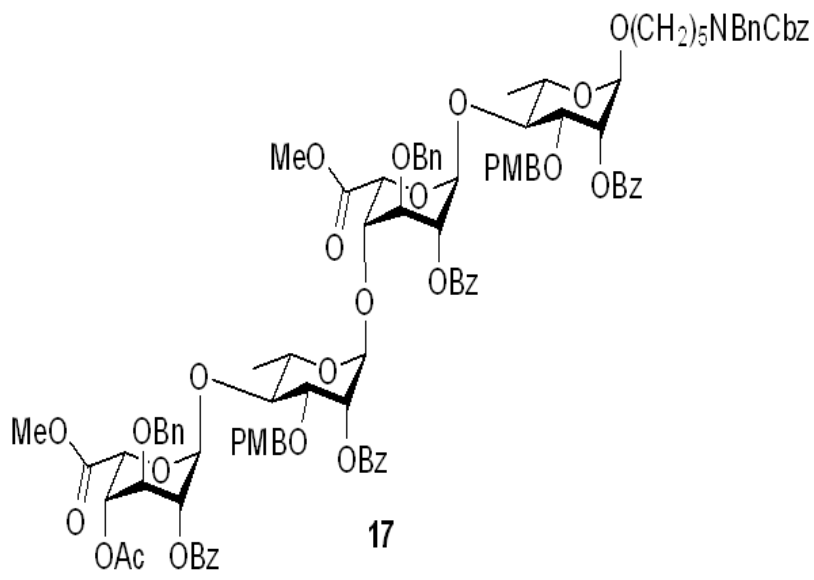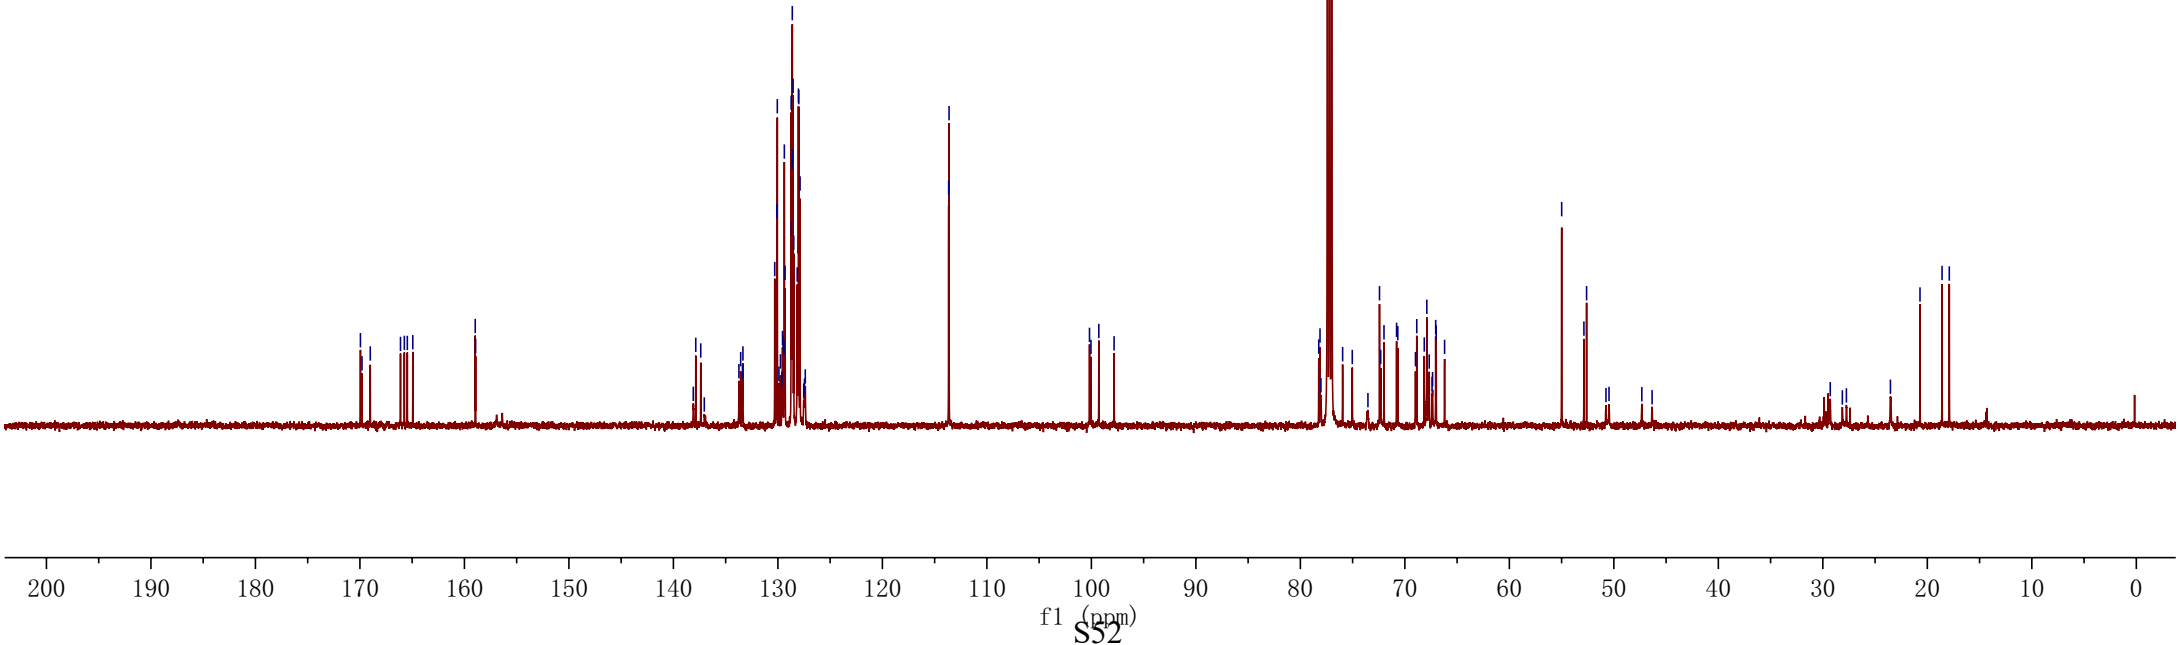

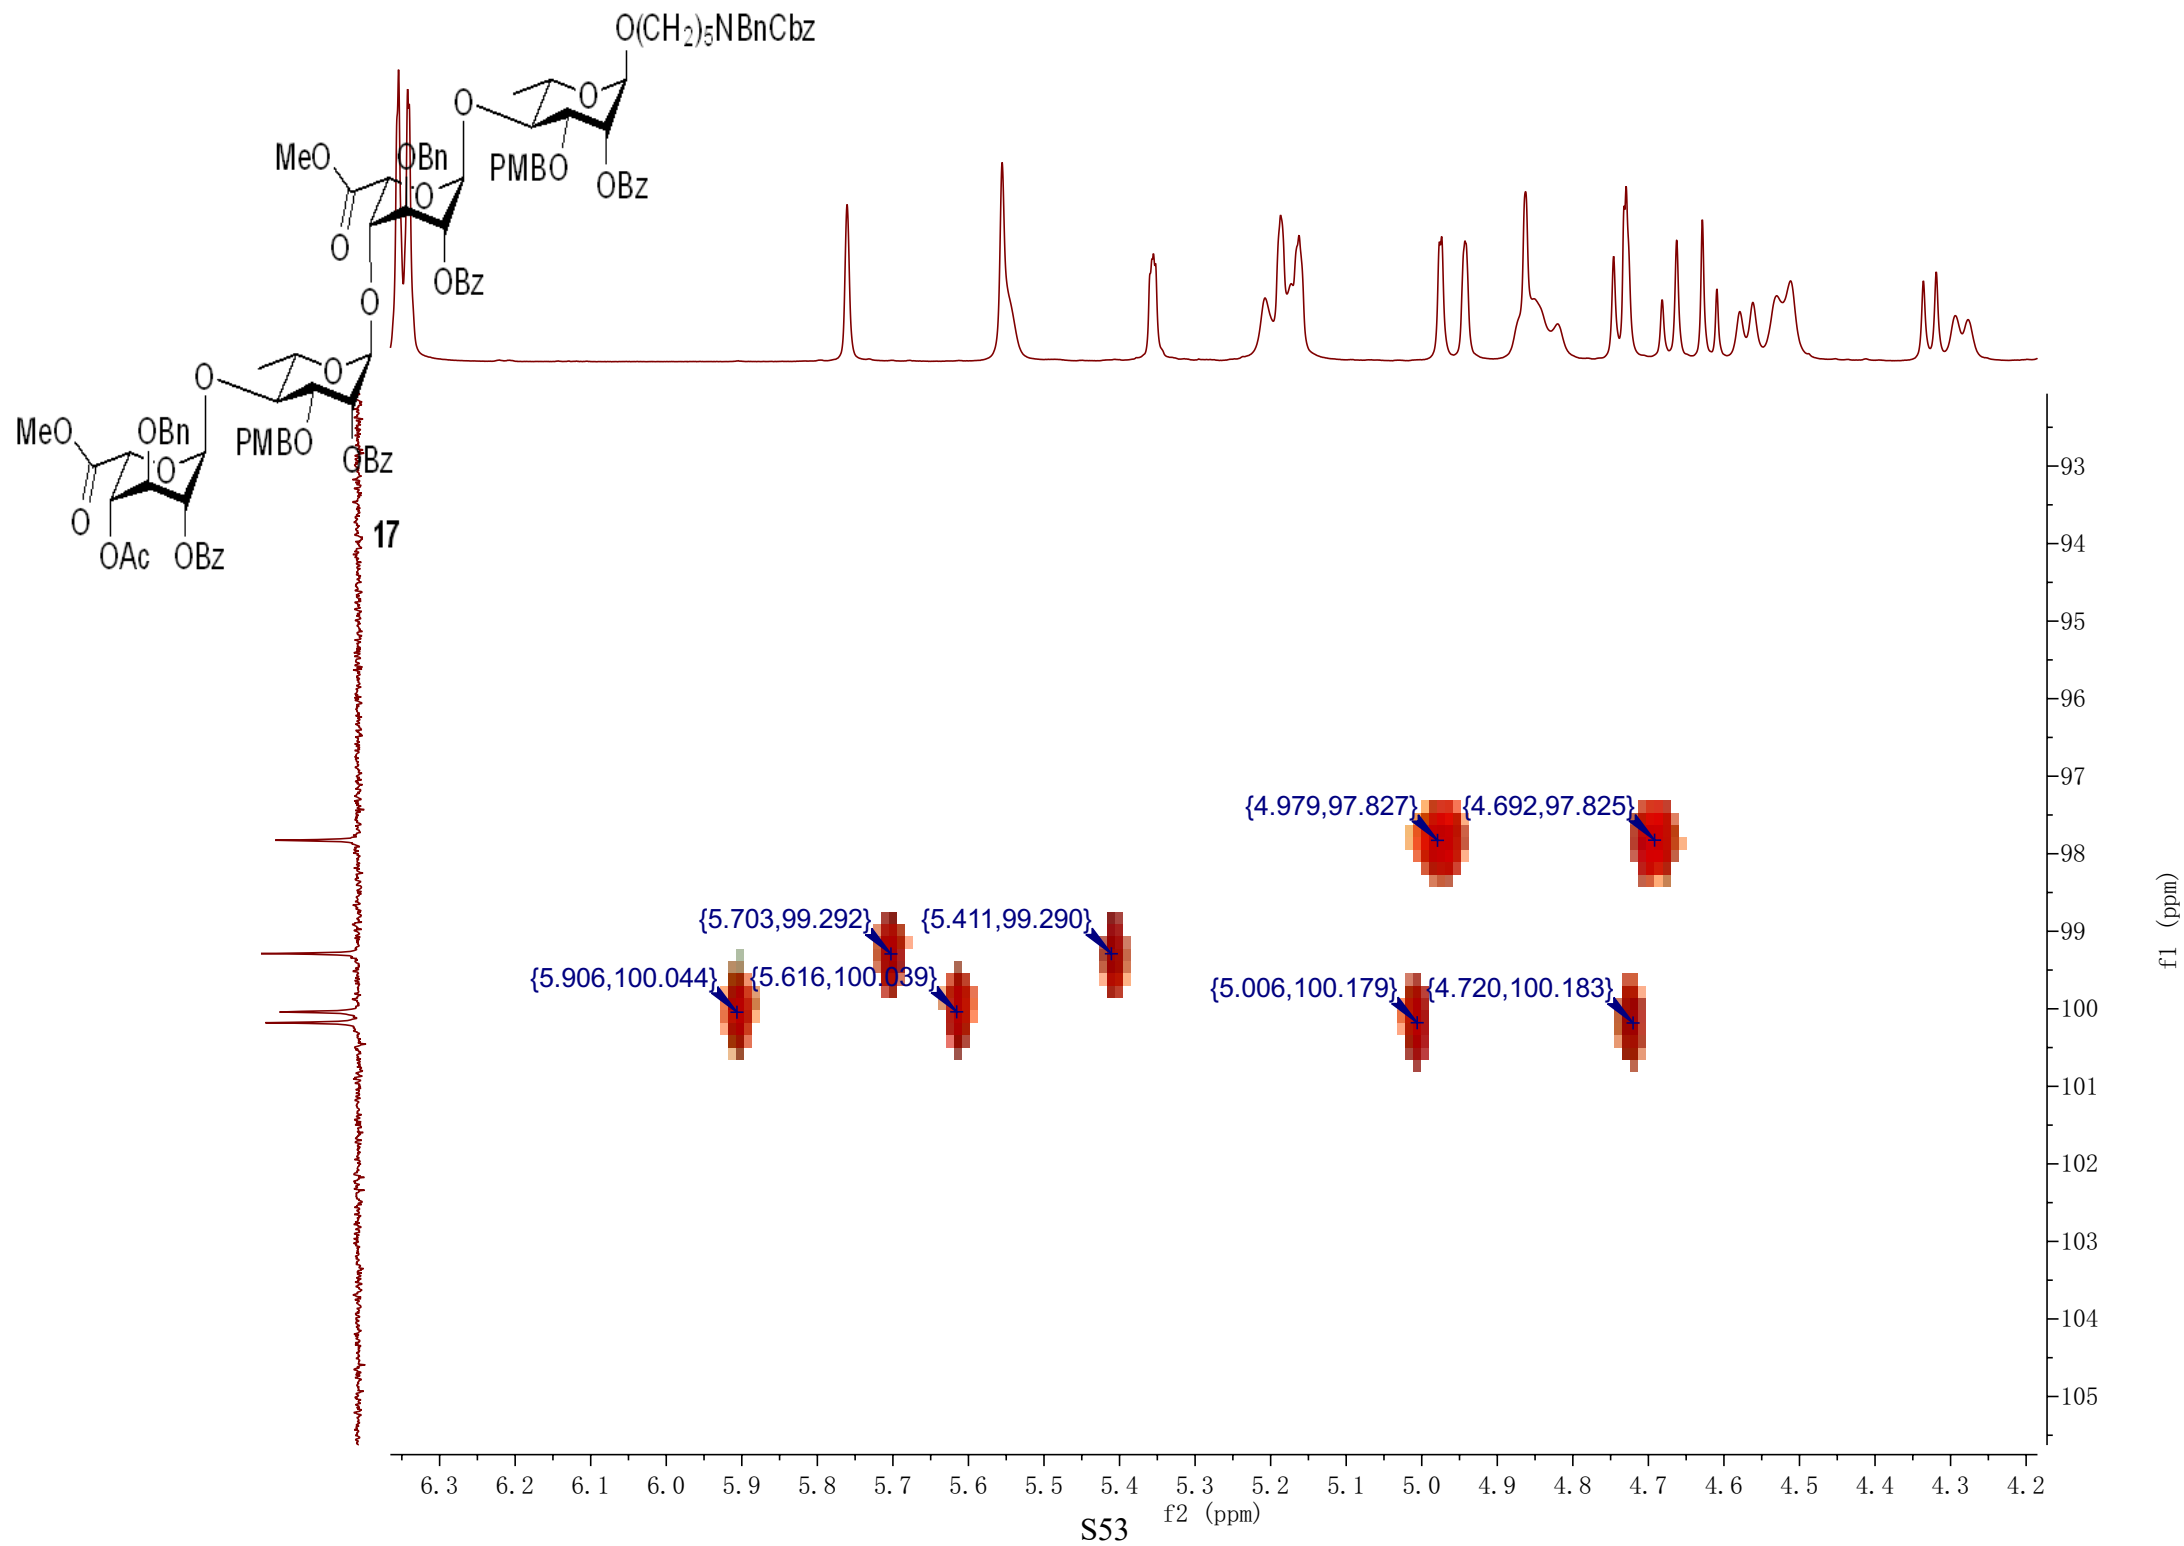

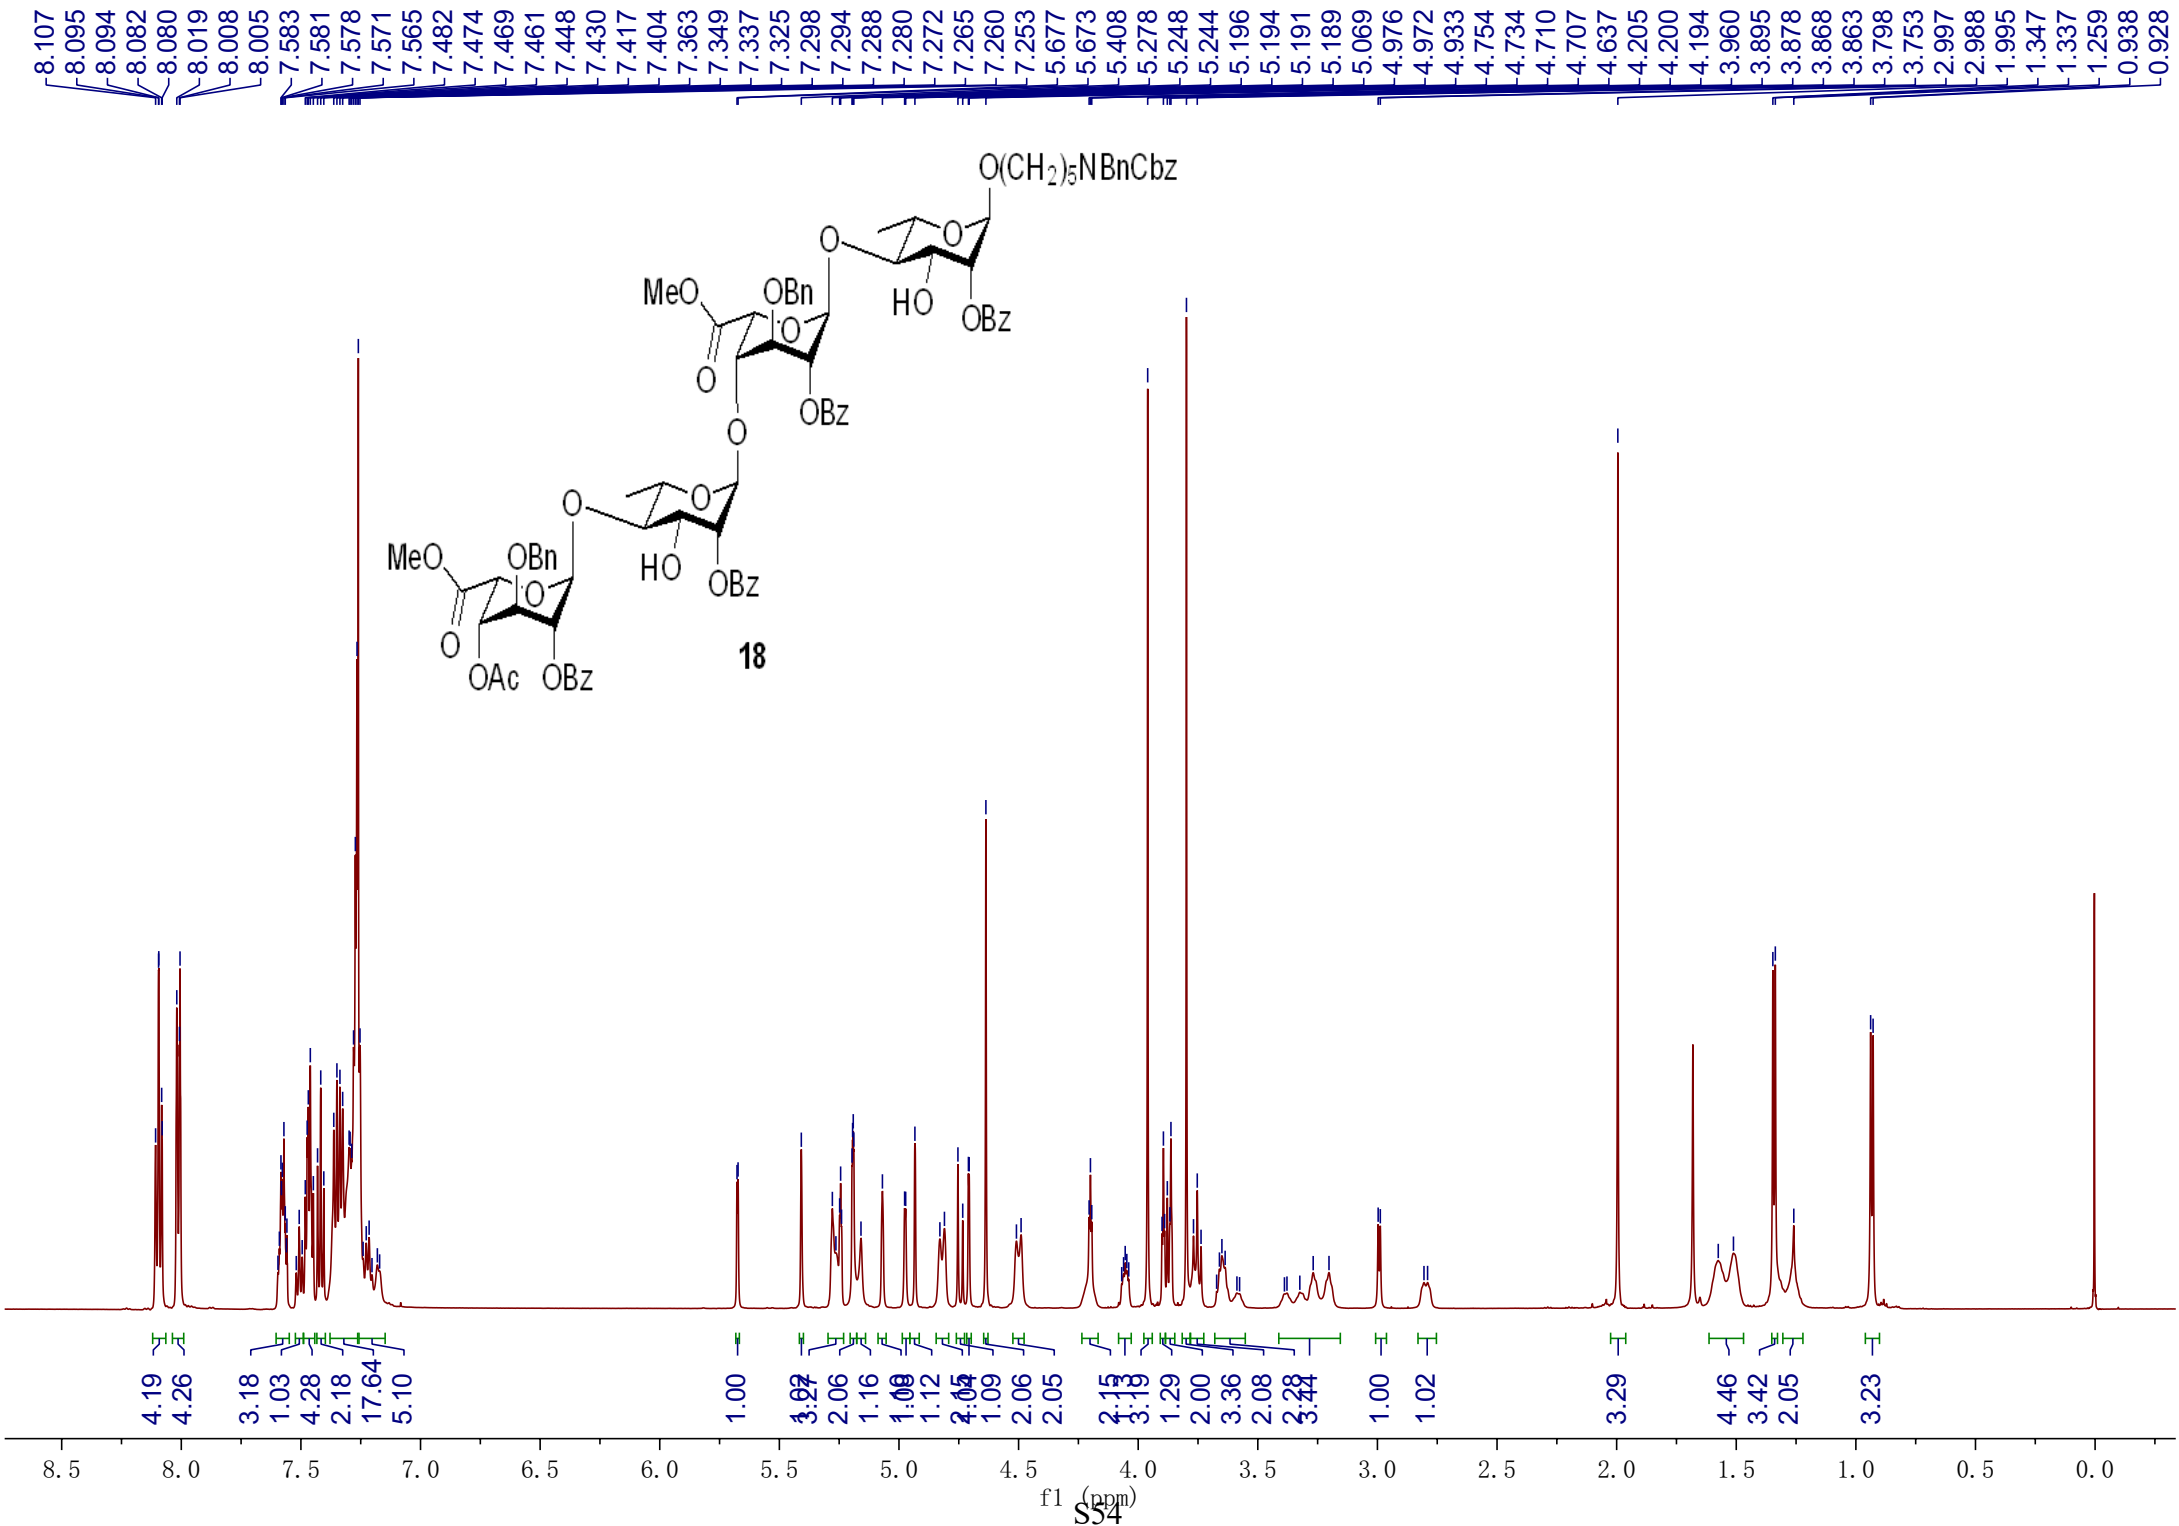

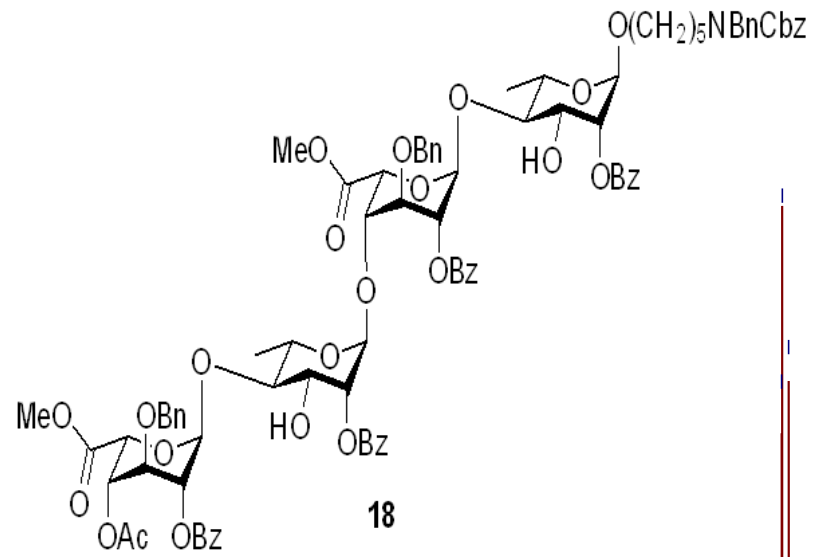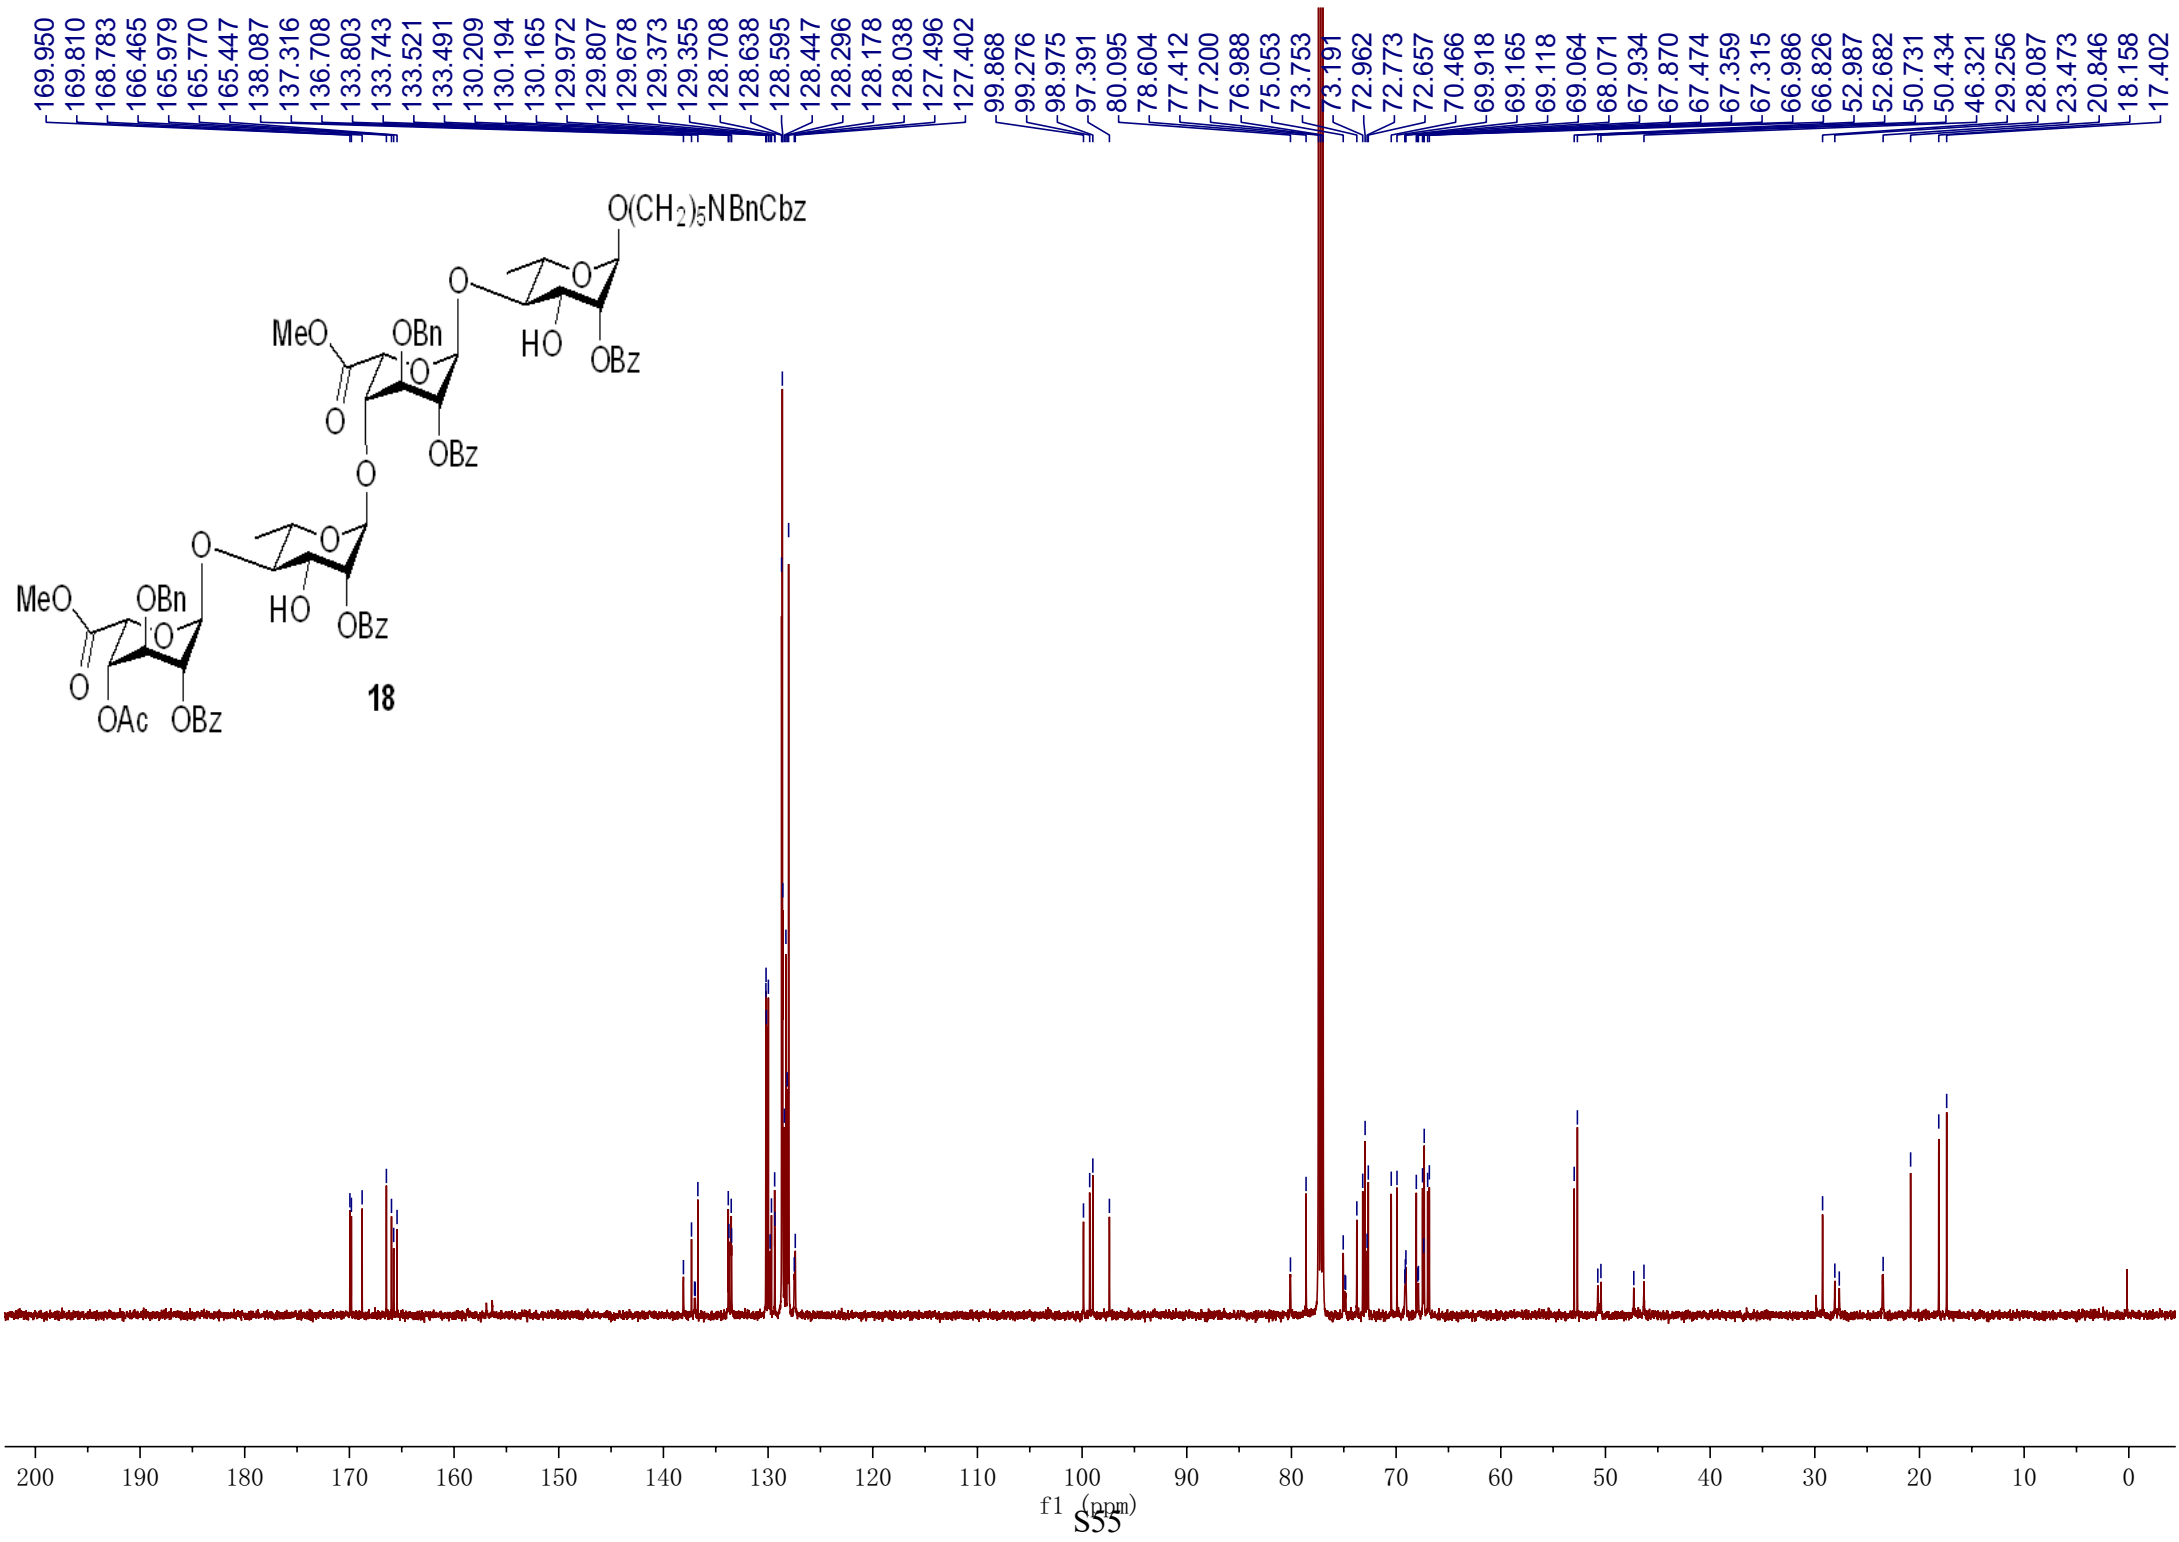





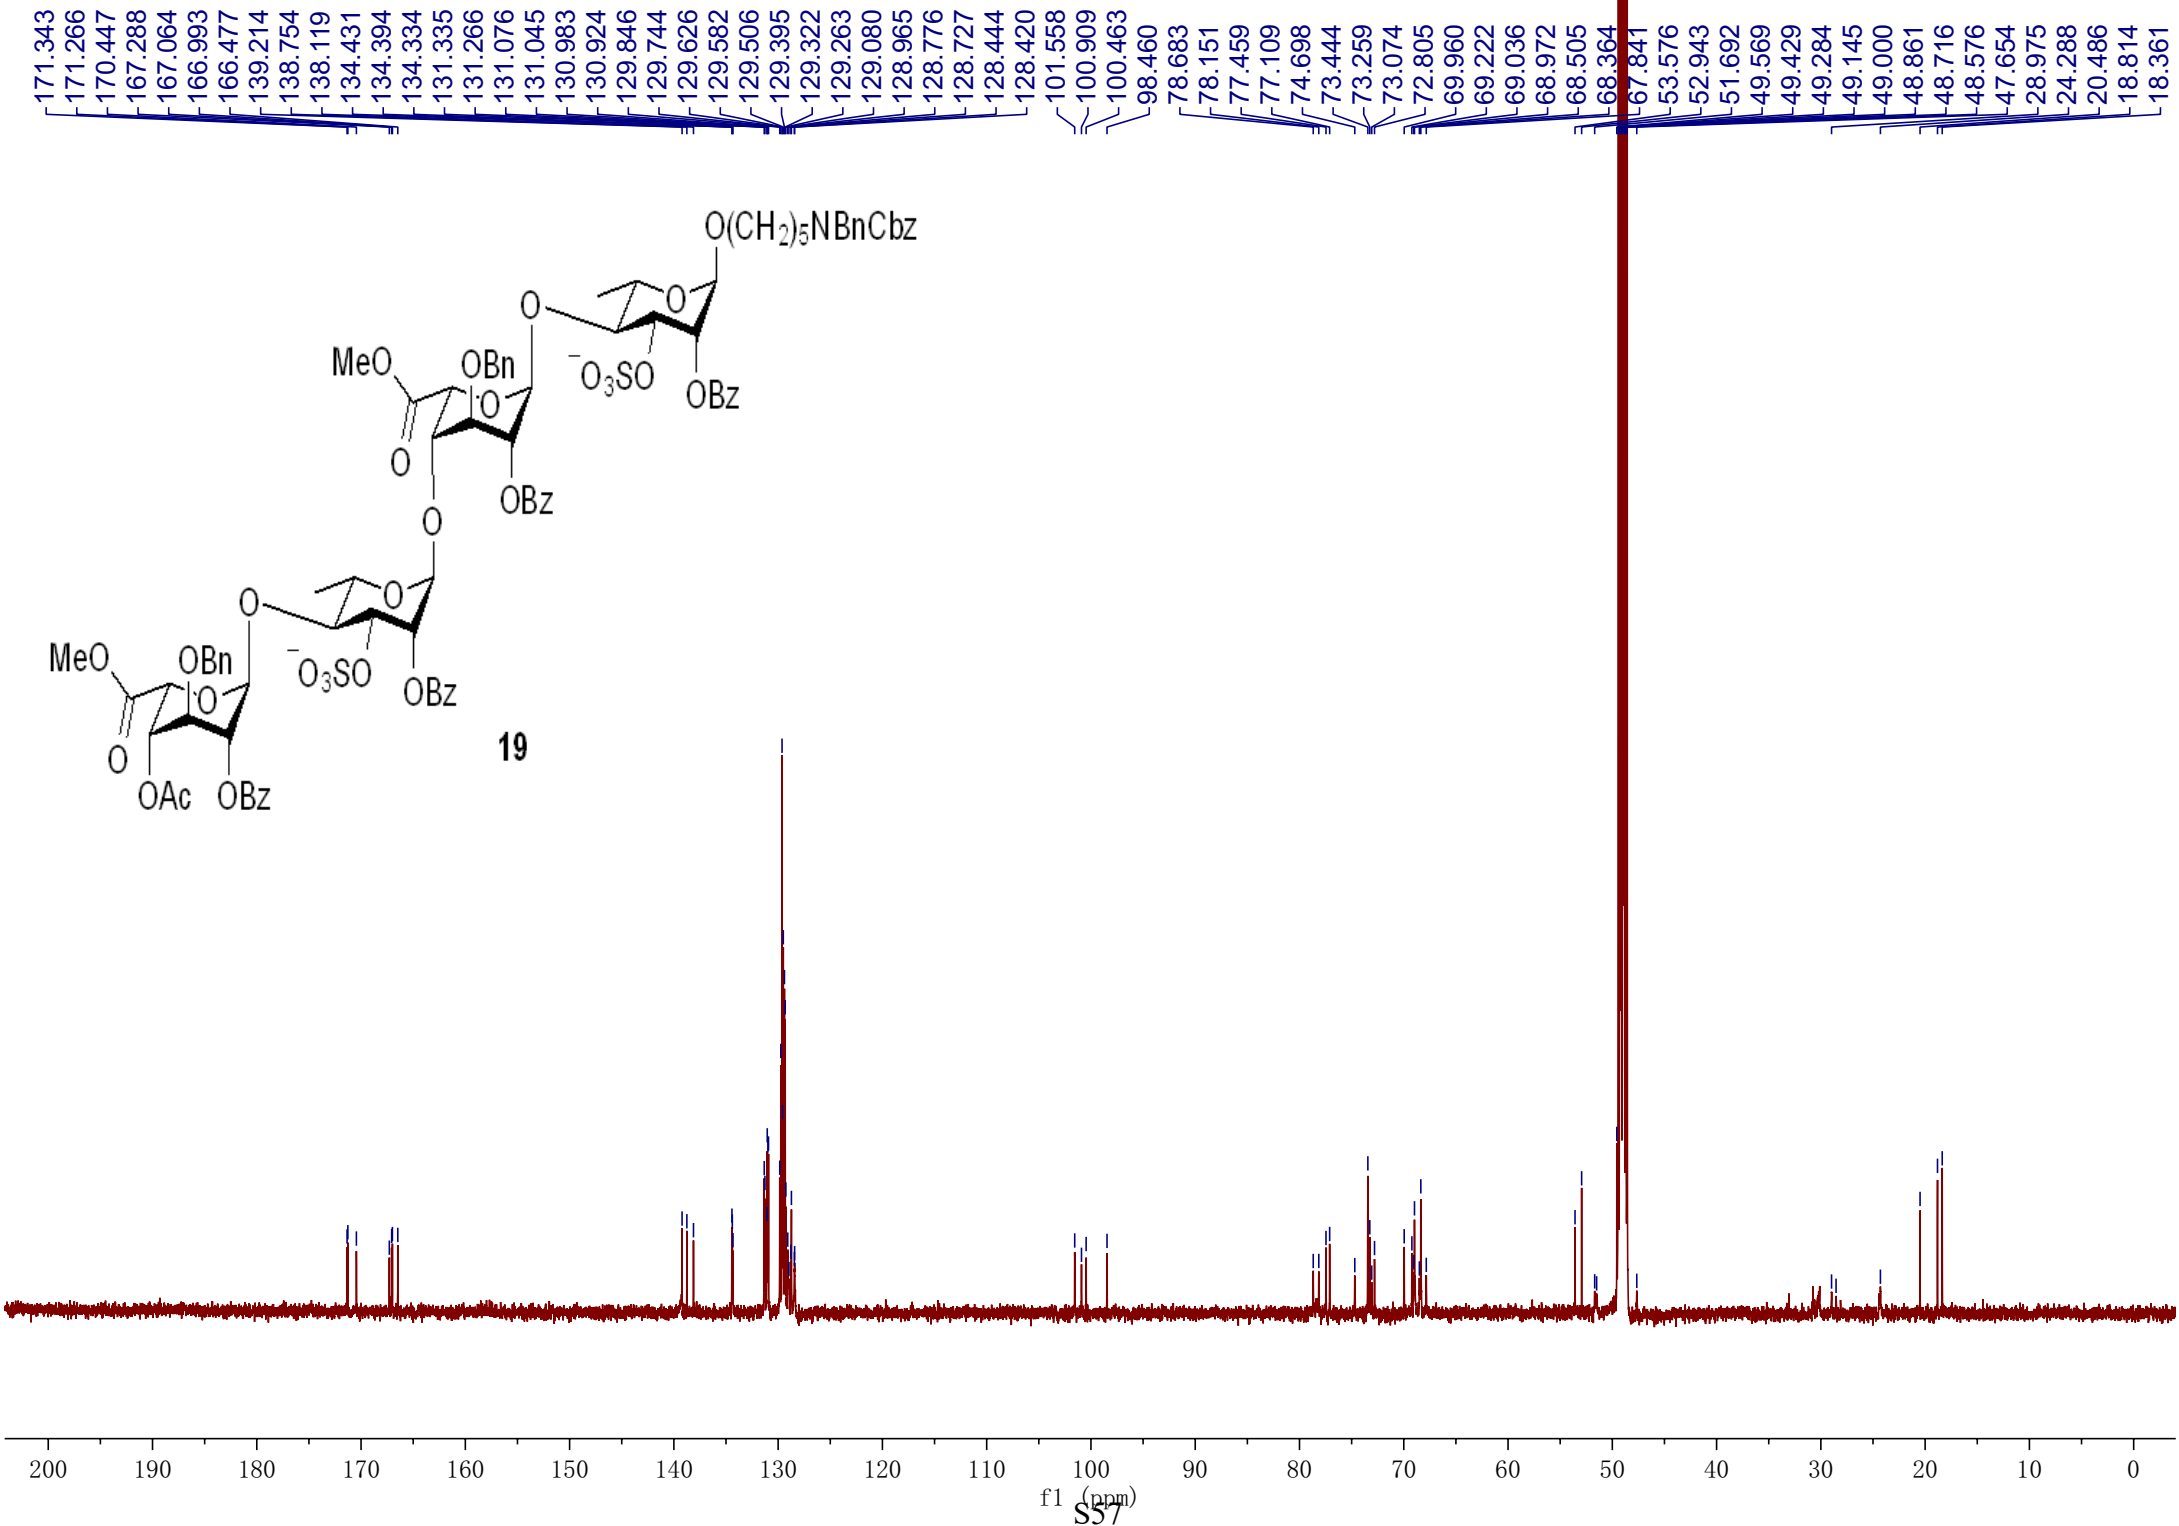

7.450  
7.438  
7.398  
7.387  
7.376  
7.362  
7.348  
7.339  
7.326  
7.316  
7.273  
7.234  
7.182

5.214  
5.131  
5.086  
4.870  
4.790  
4.768  
4.758  
4.739  
4.682  
4.663  
4.638  
4.572  
4.567  
4.556  
4.552  
4.541  
4.538  
4.489  
4.448  
4.299  
4.286  
4.252  
4.146  
4.054  
4.050  
4.047  
4.044  
4.000  
3.984  
3.775  
3.760  
3.753  
3.746  
3.730  
3.714  
3.699  
3.658  
3.502  
3.235  
3.207  
1.529  
1.507  
1.439  
1.304  
1.249  
1.241  
1.211  
1.202  
1.033

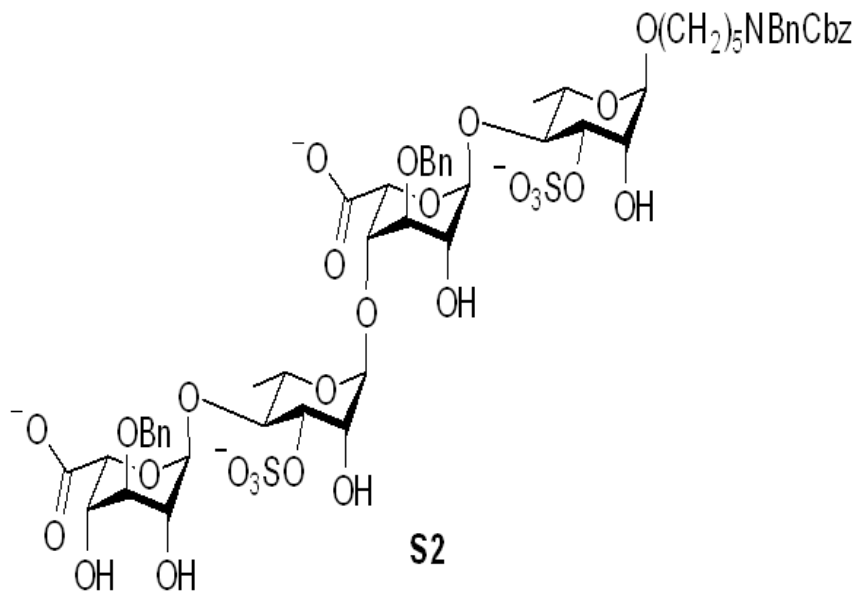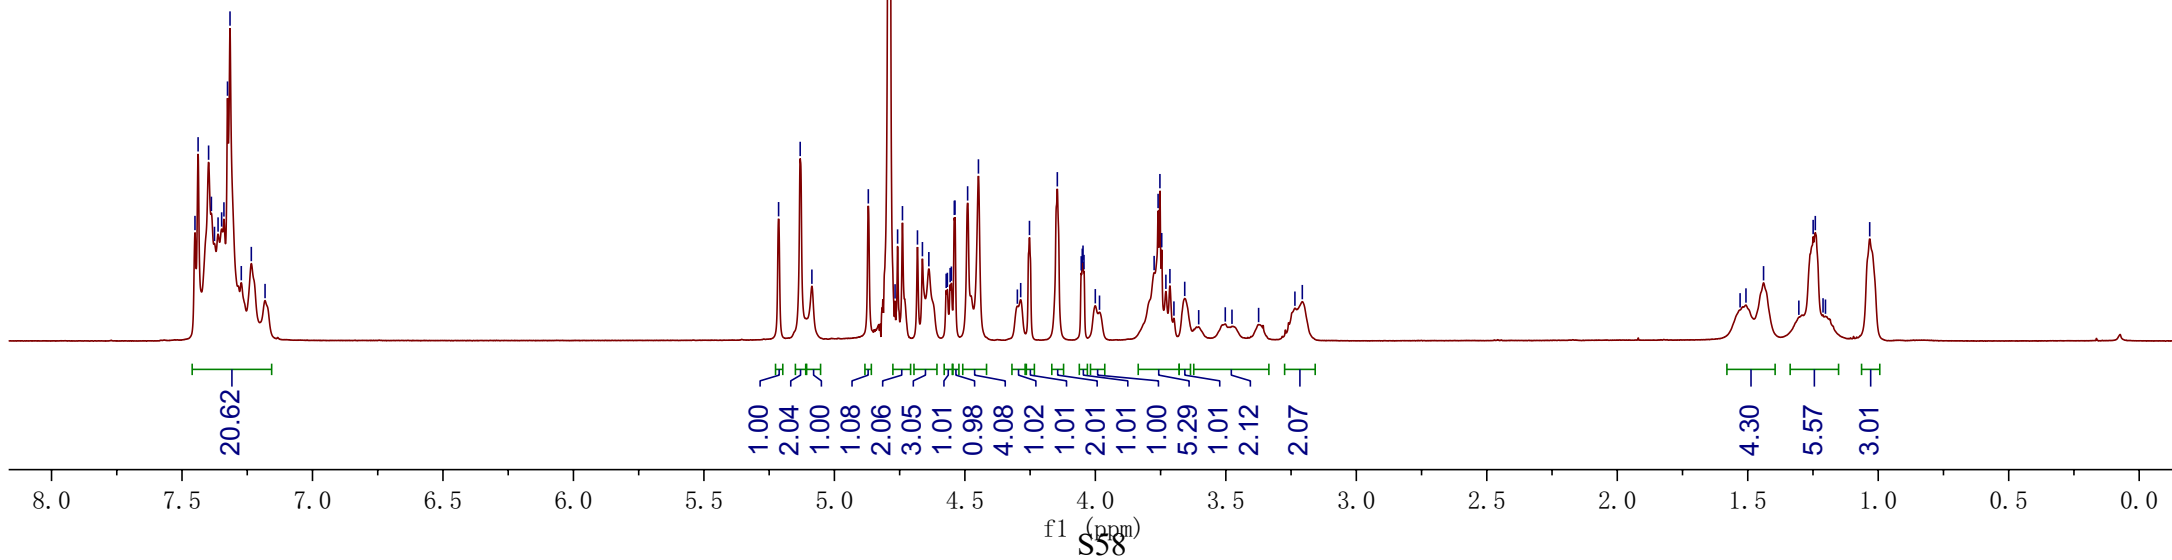

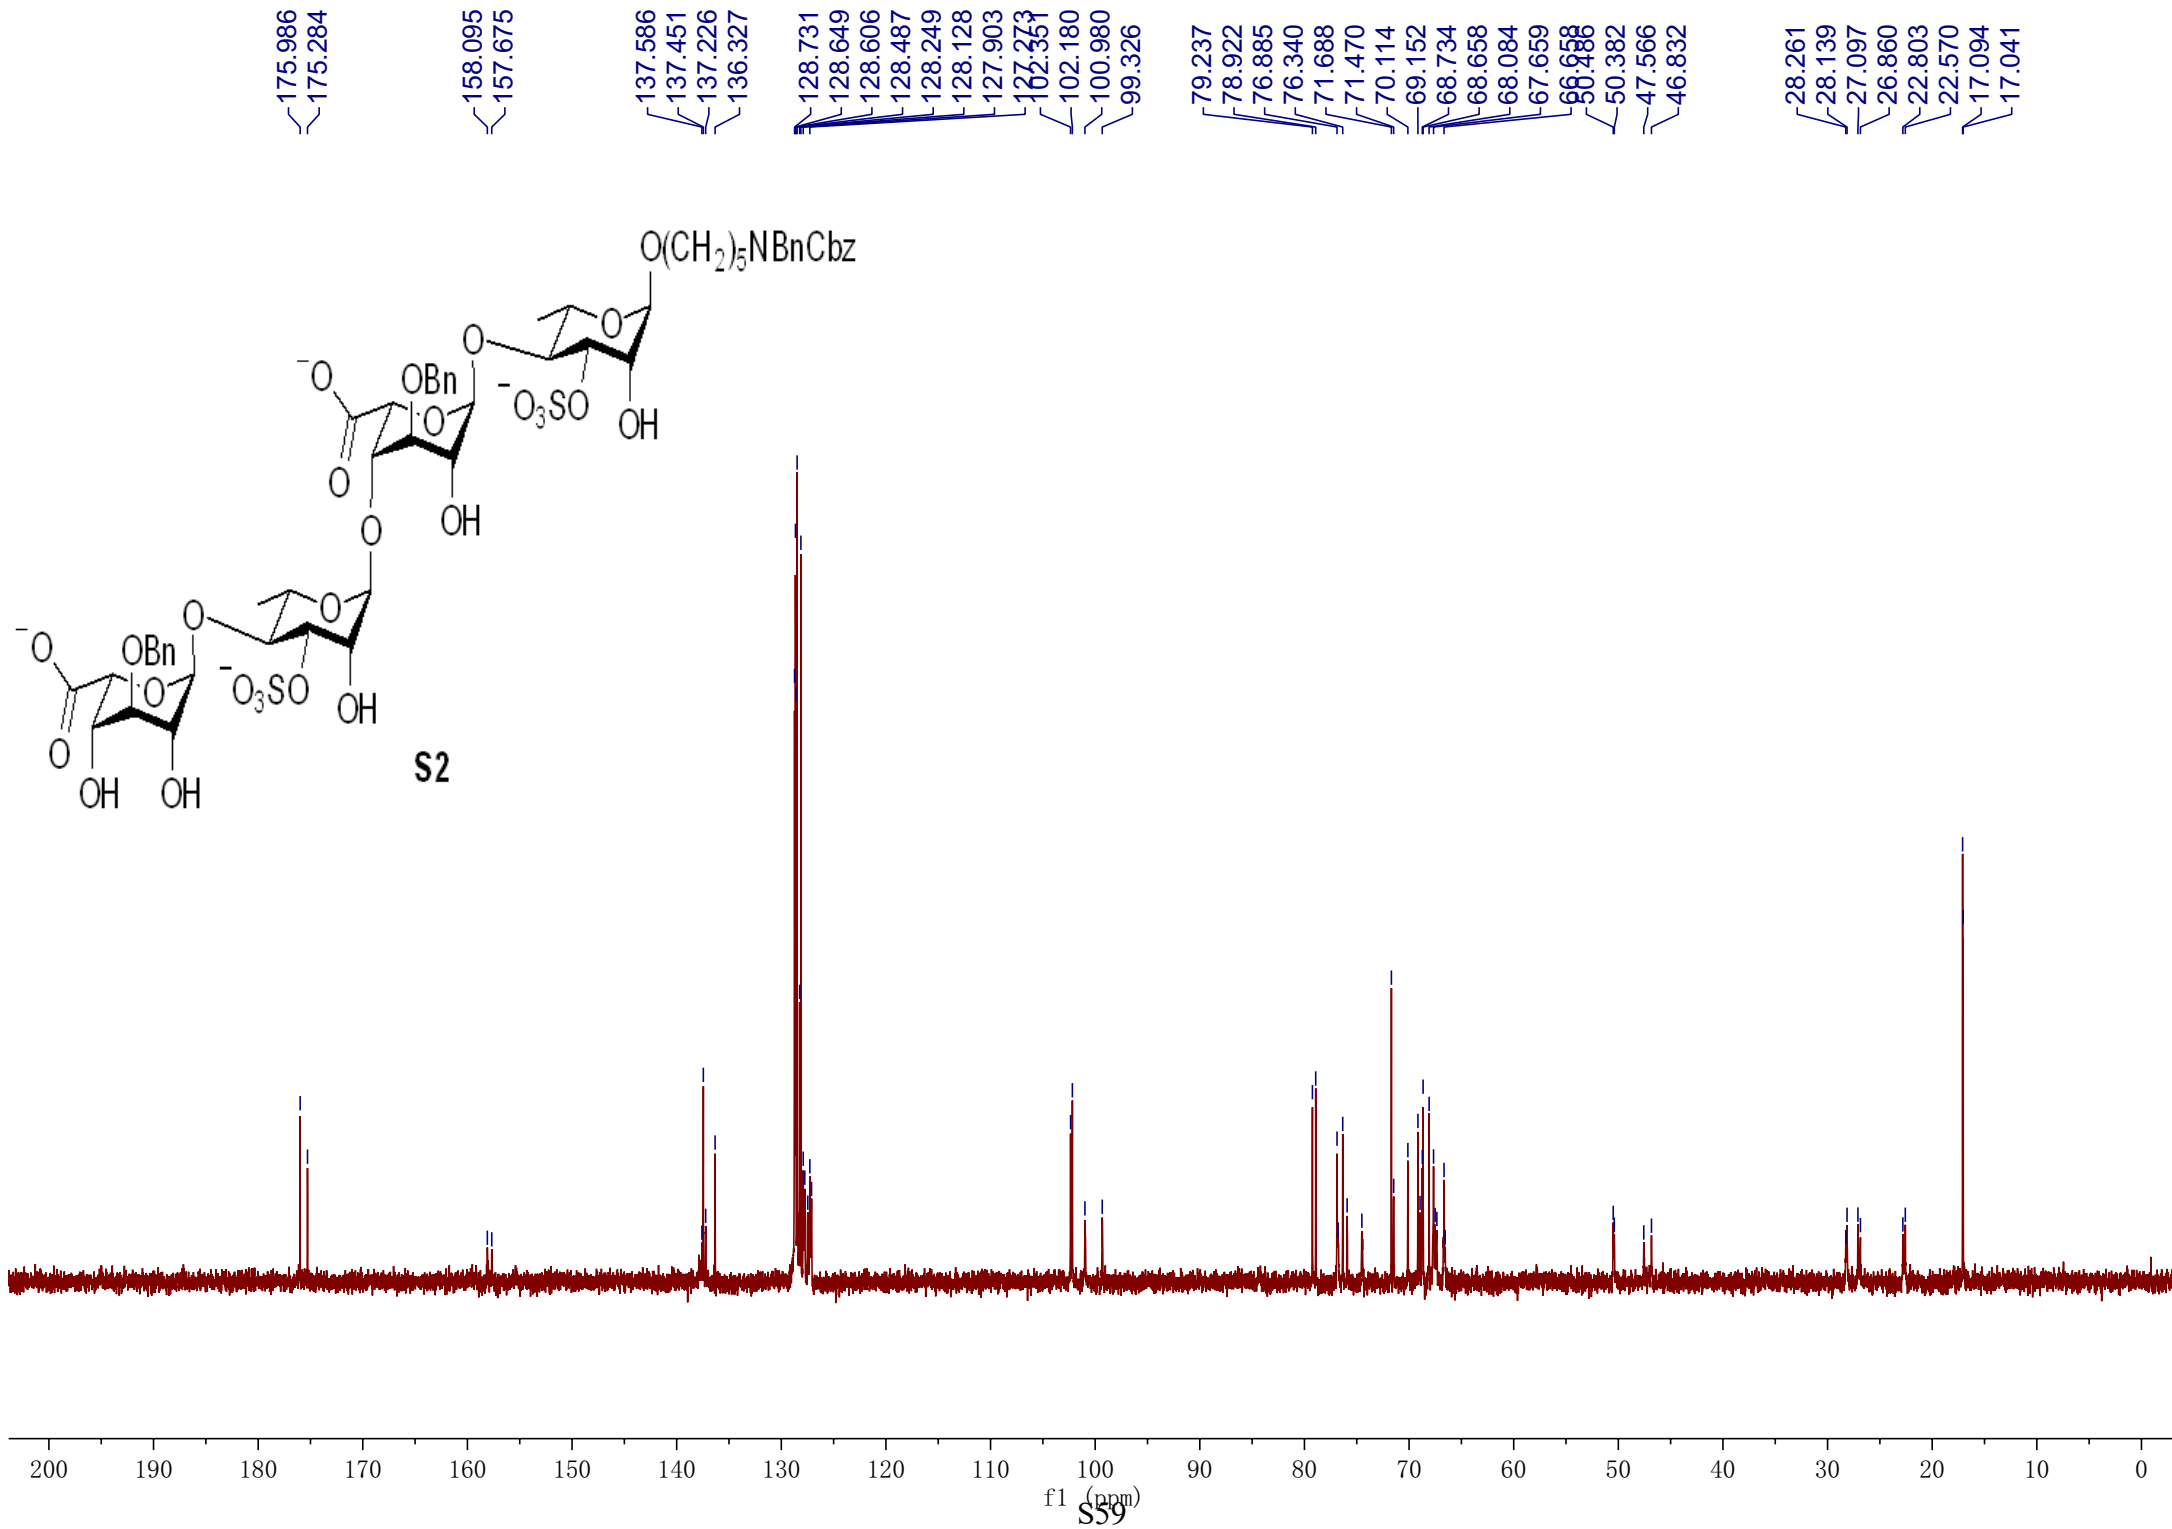

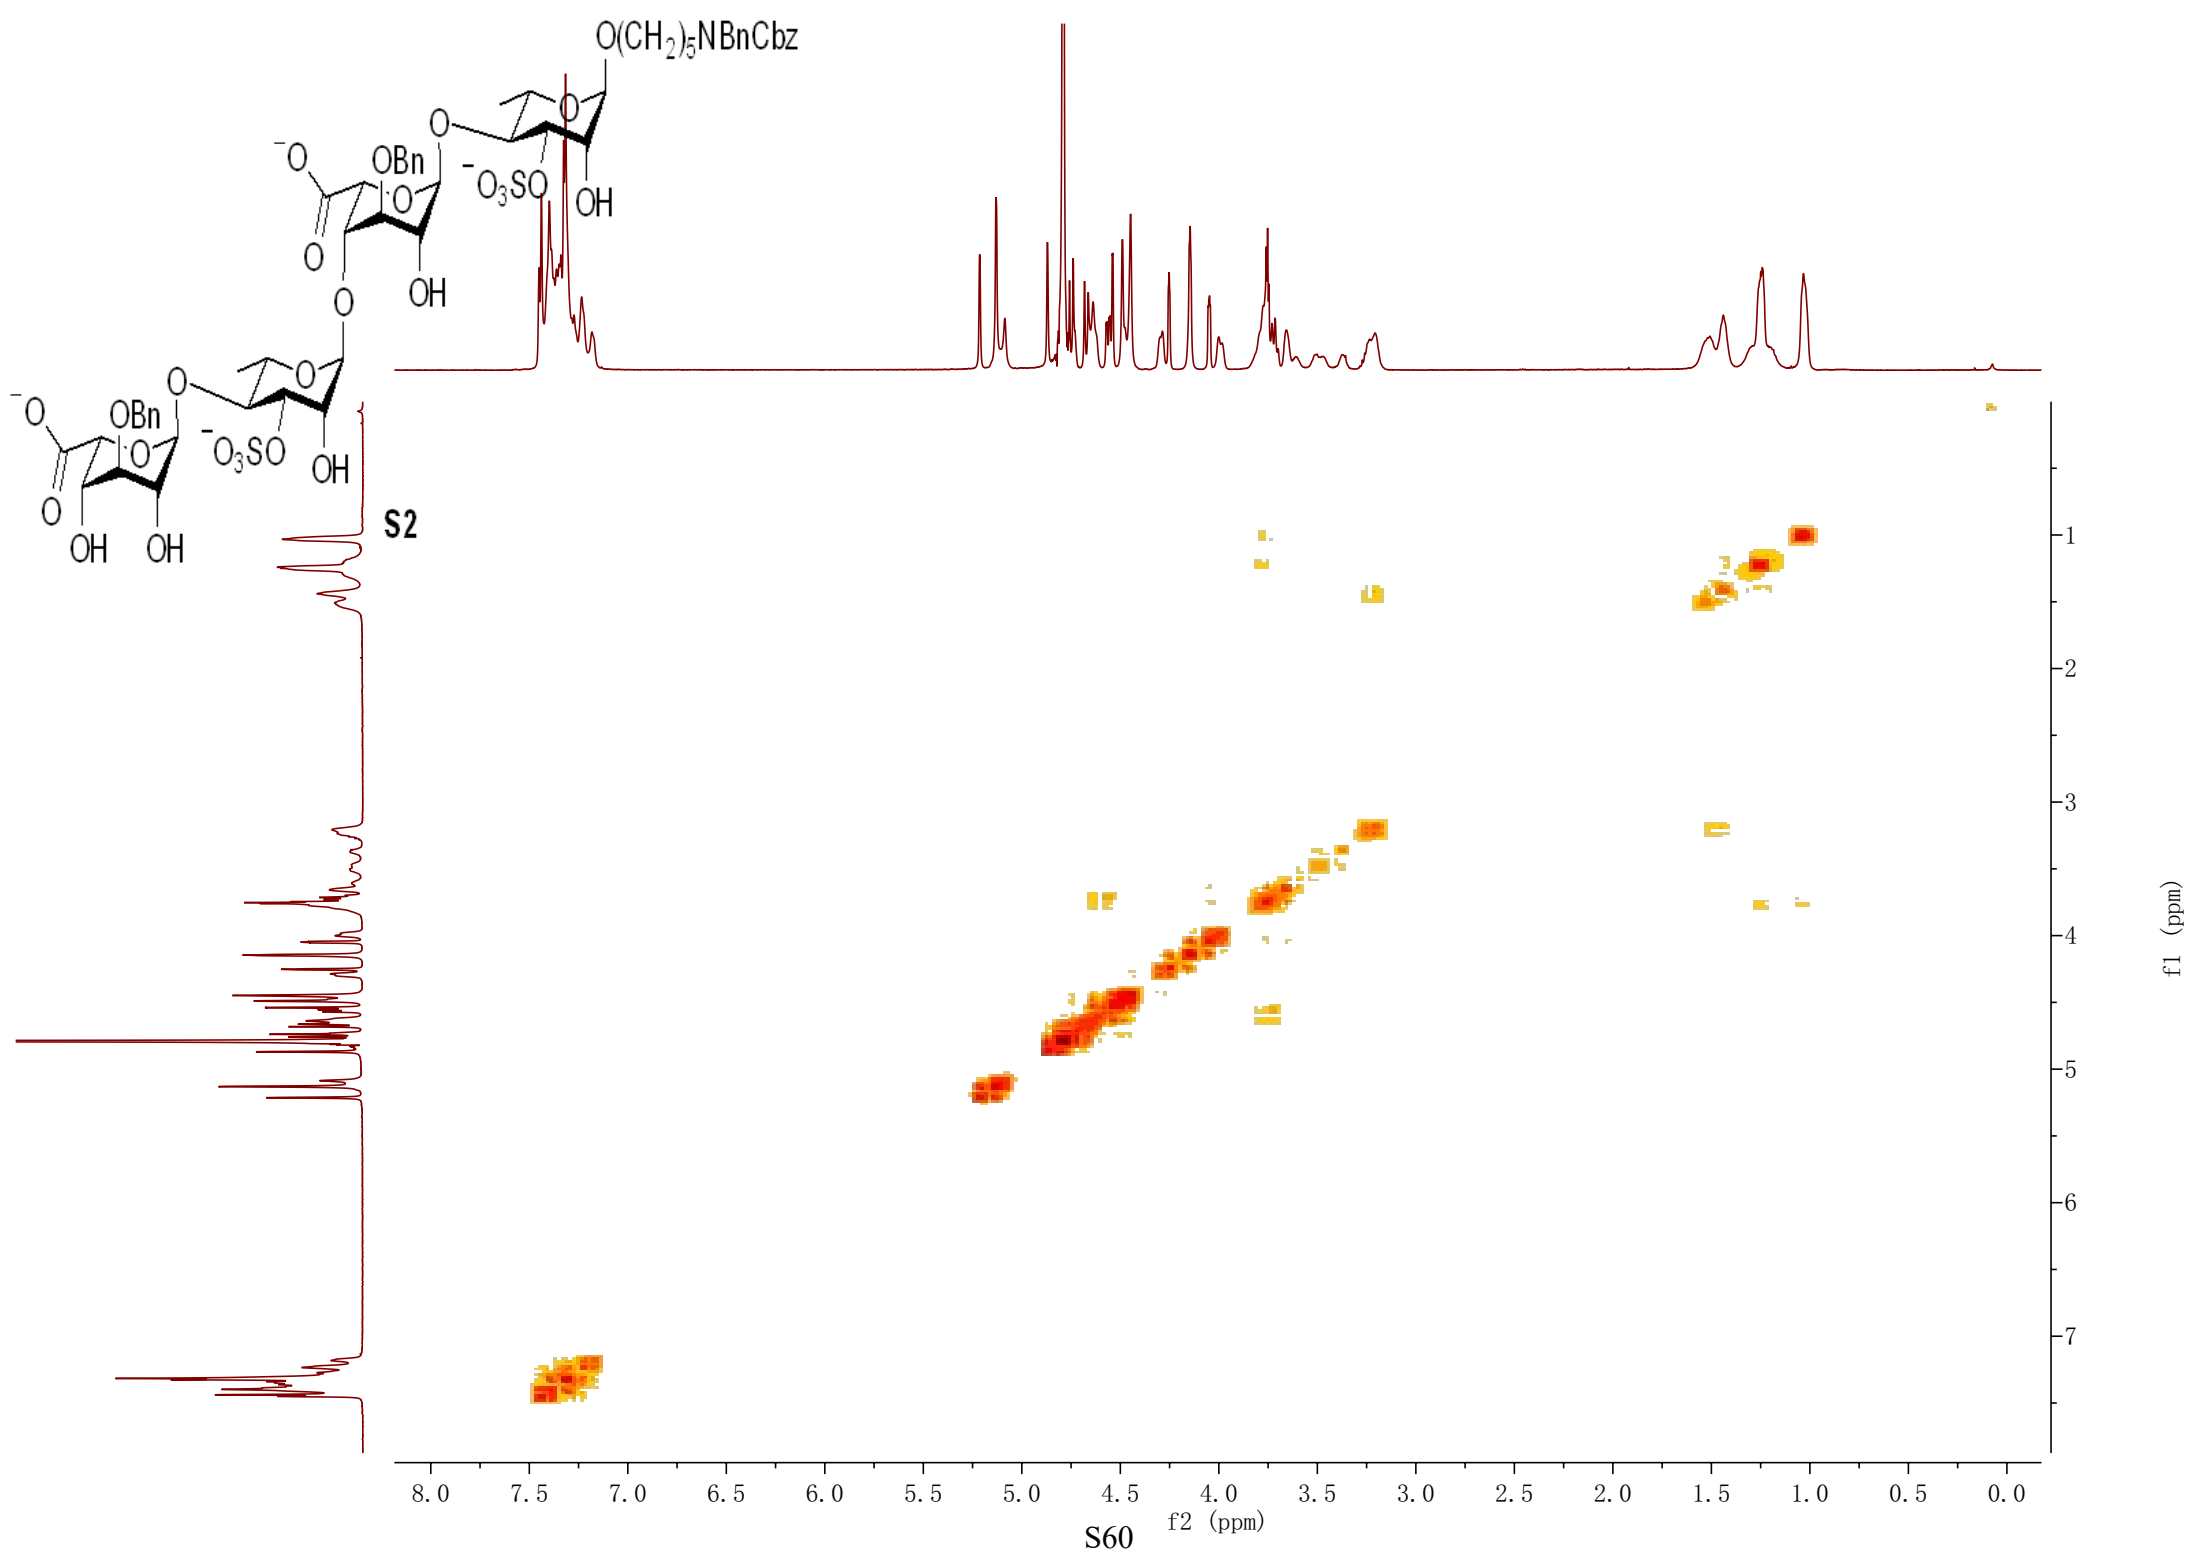

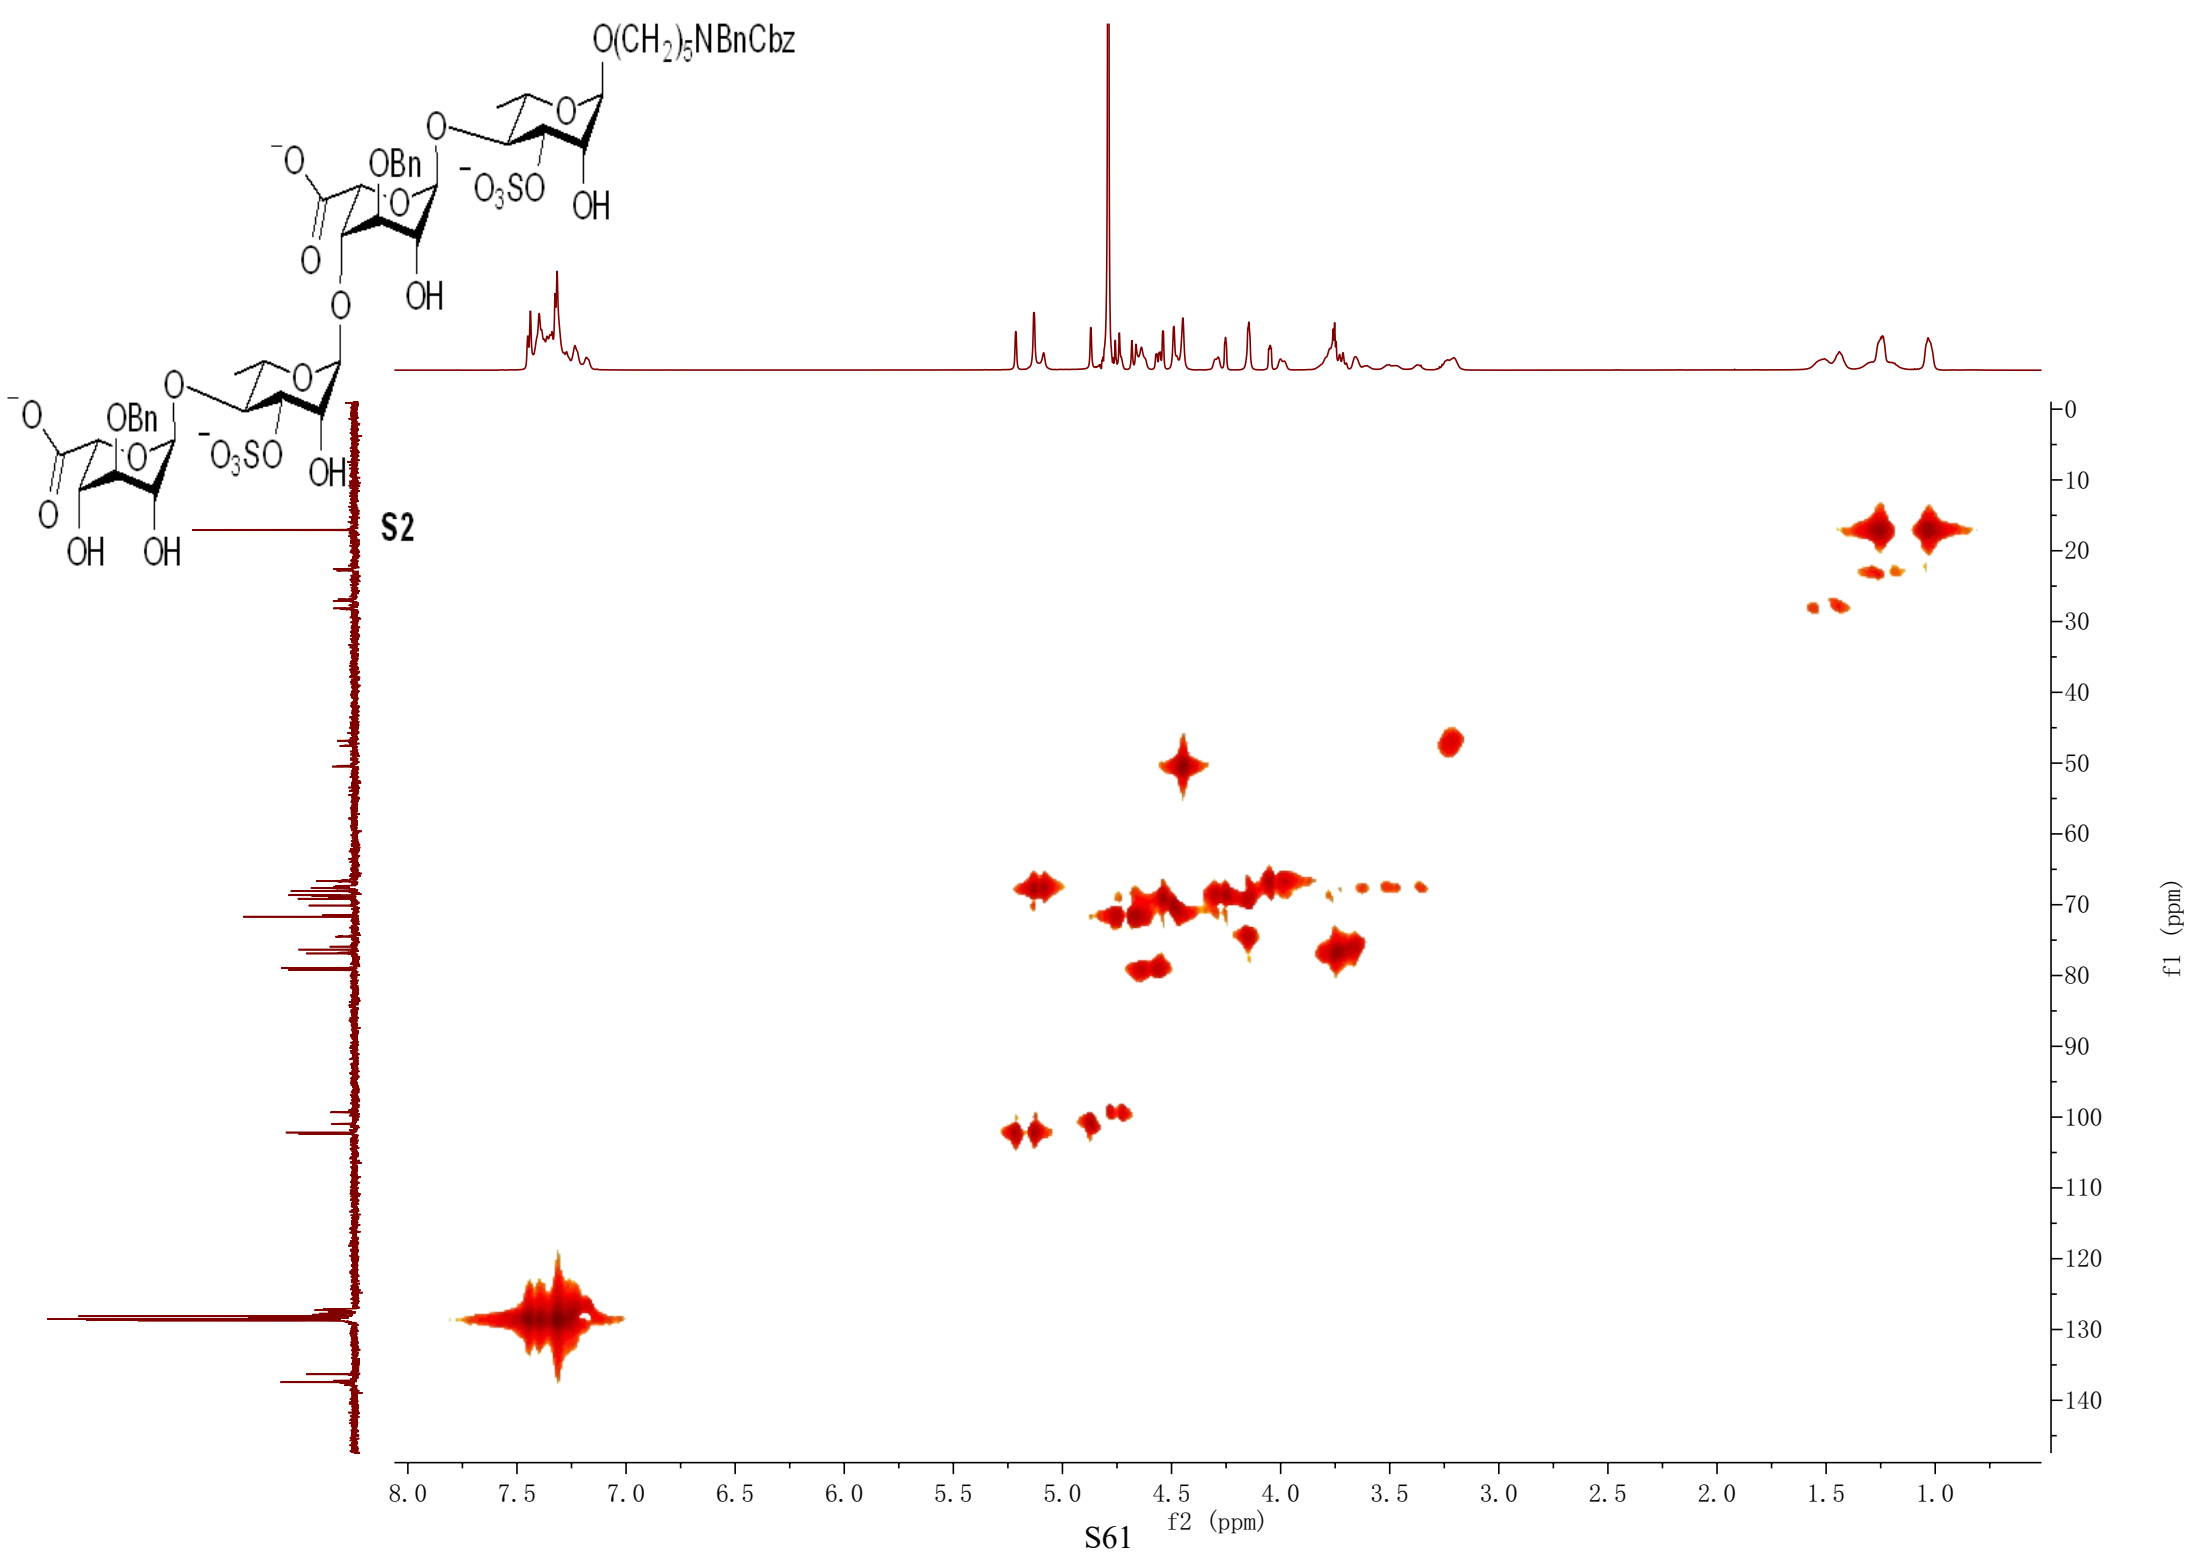

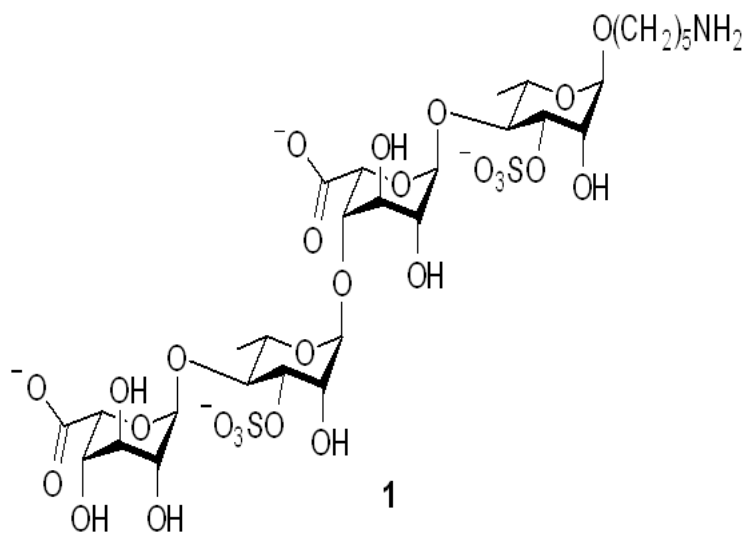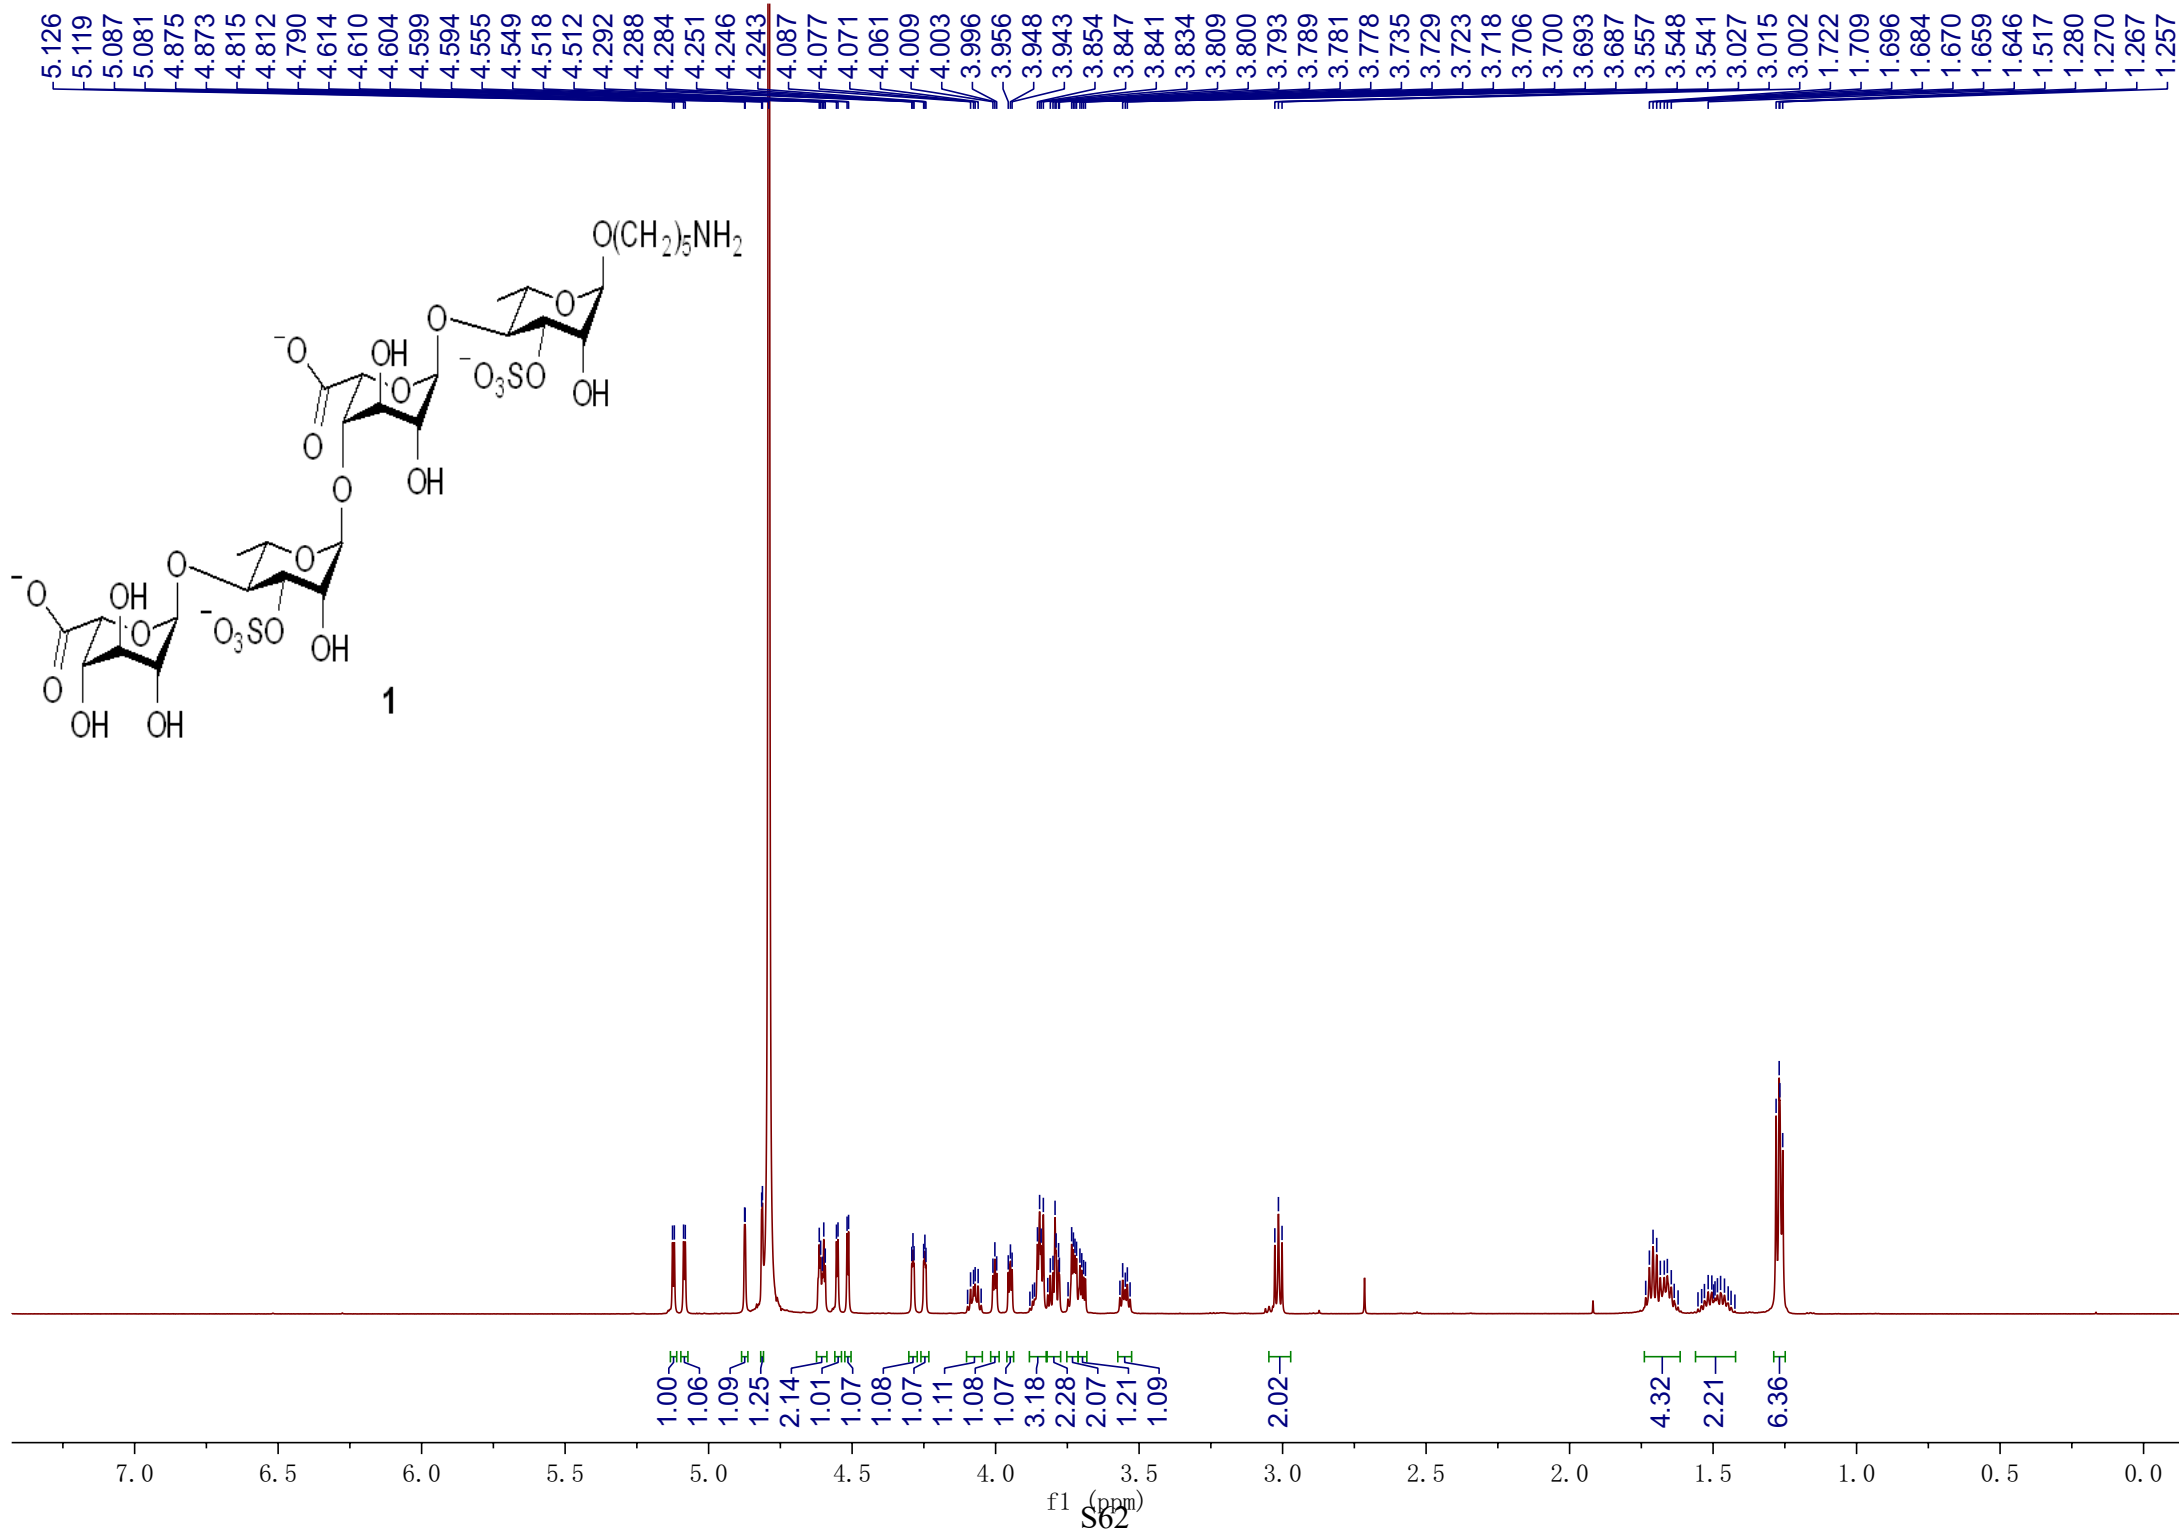

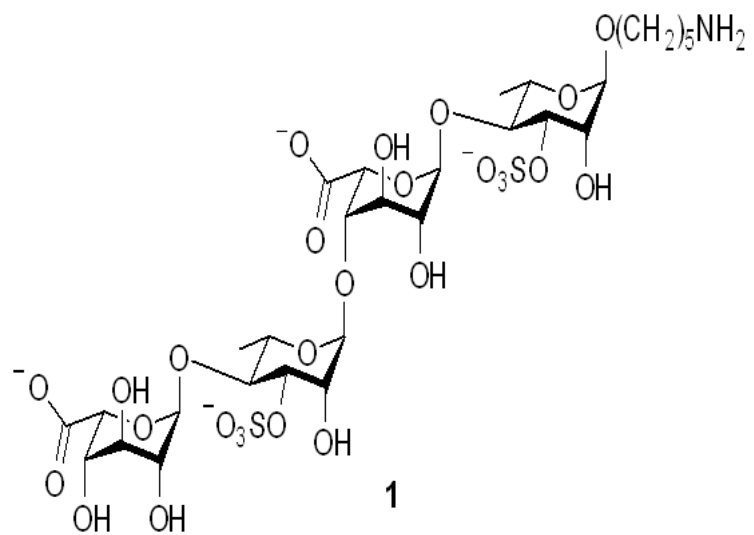

175.736  
174.578

102.954  
102.665  
101.208  
99.318  
78.994  
78.792  
76.488  
76.128  
71.426  
71.297  
71.163  
70.941  
70.741  
70.263  
69.909  
68.820  
68.764  
67.778  
67.594  
67.412

39.394

27.958  
26.562  
22.575  
16.860  
16.836

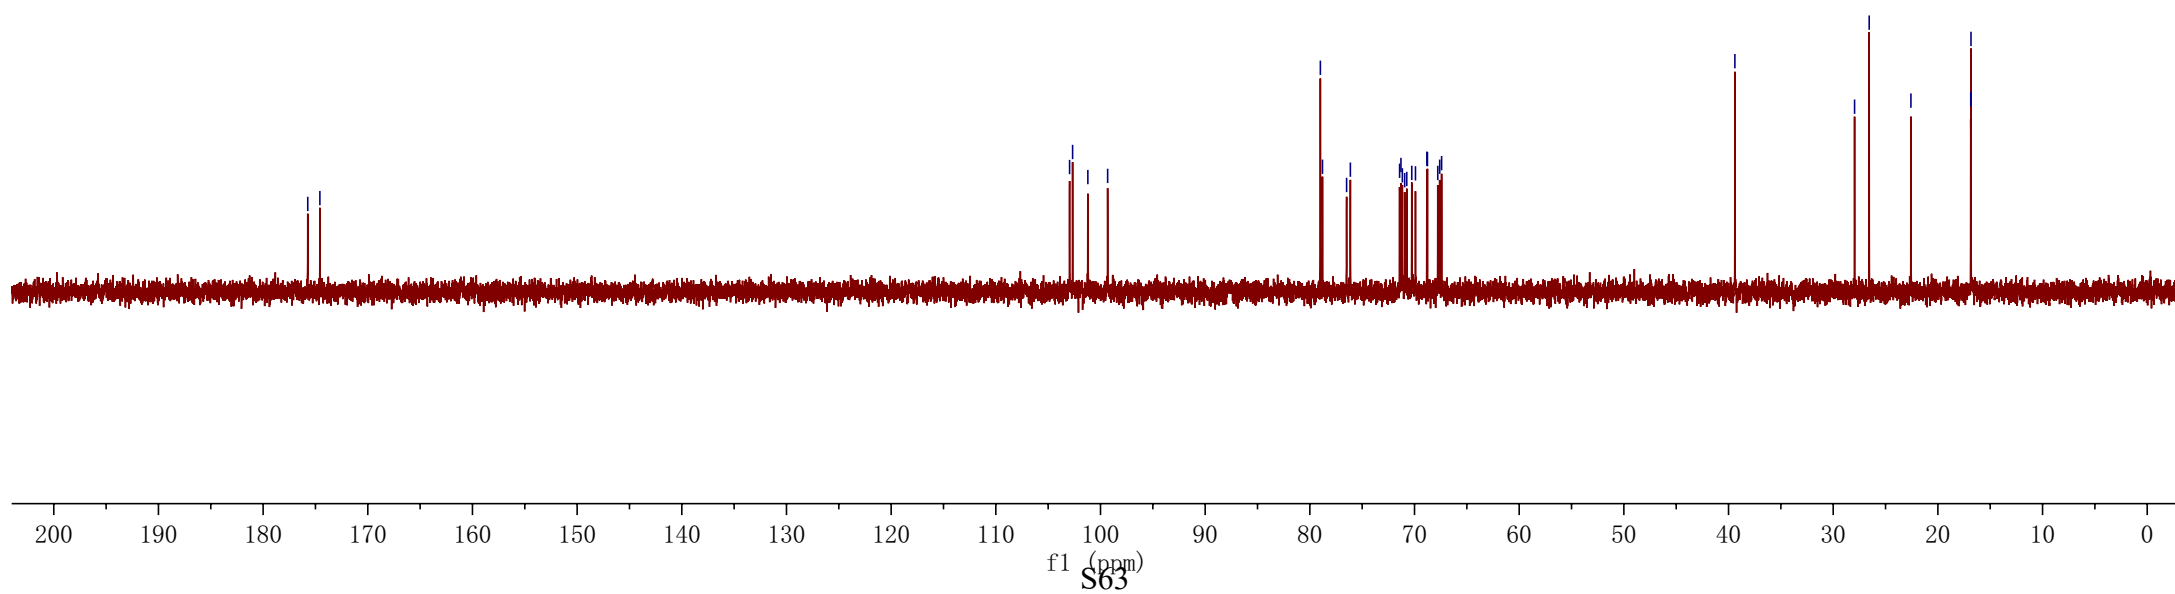

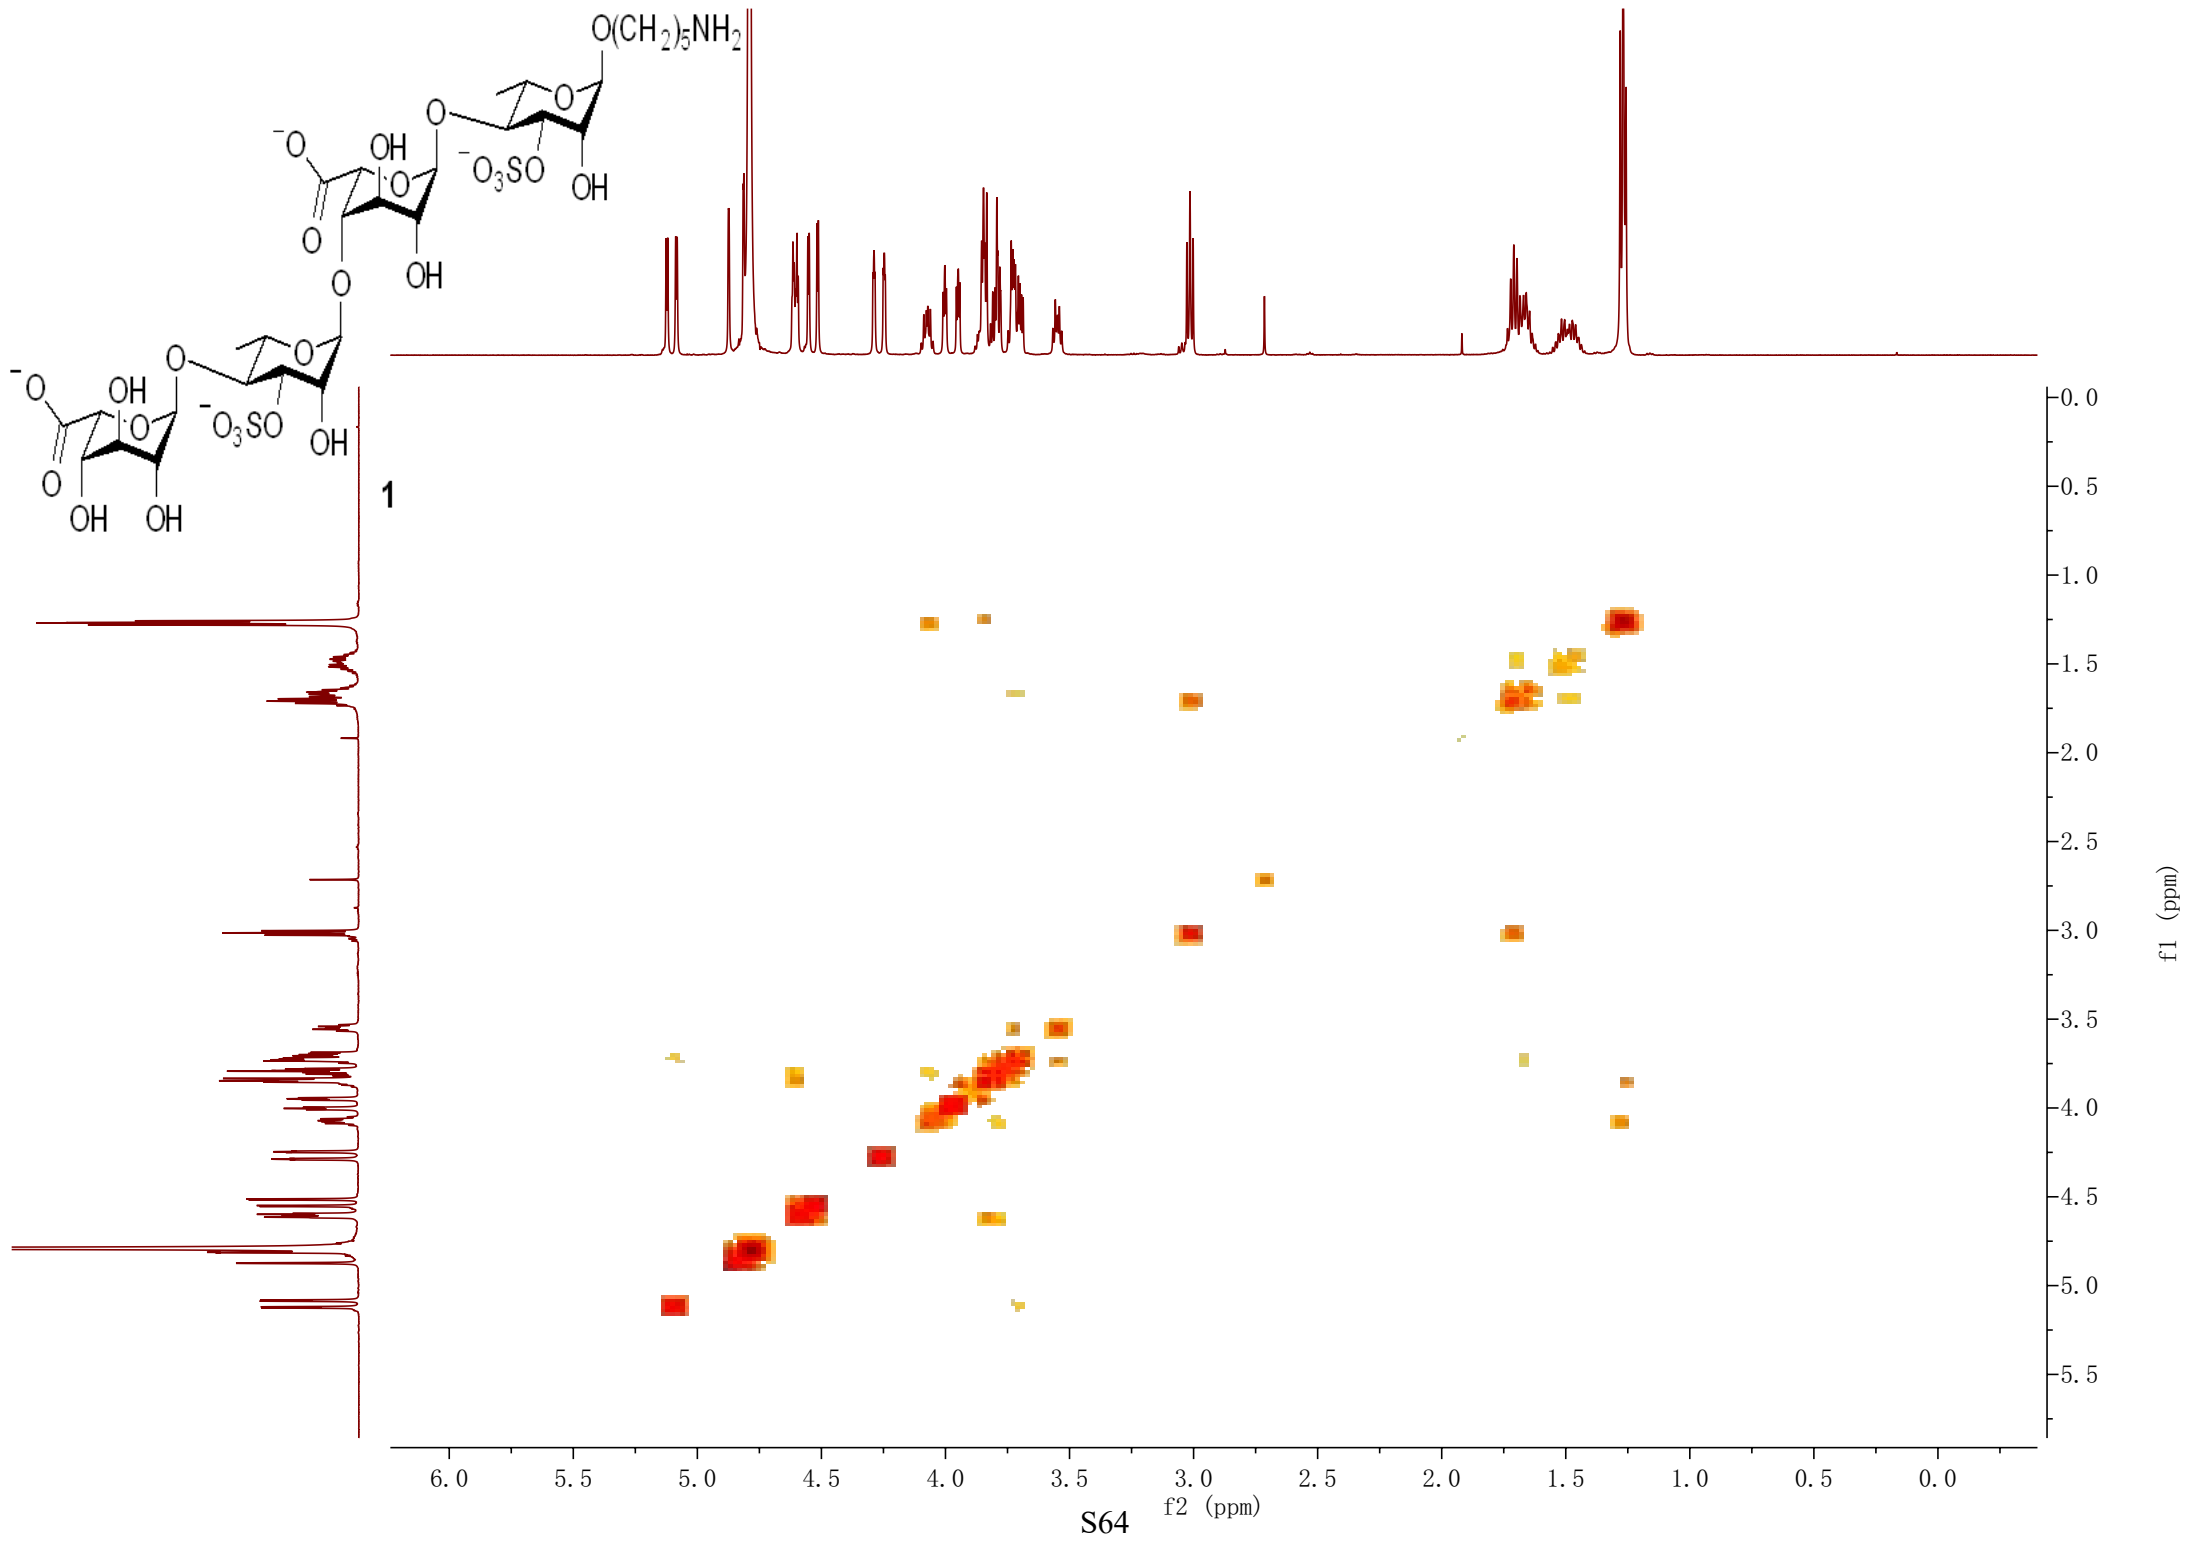



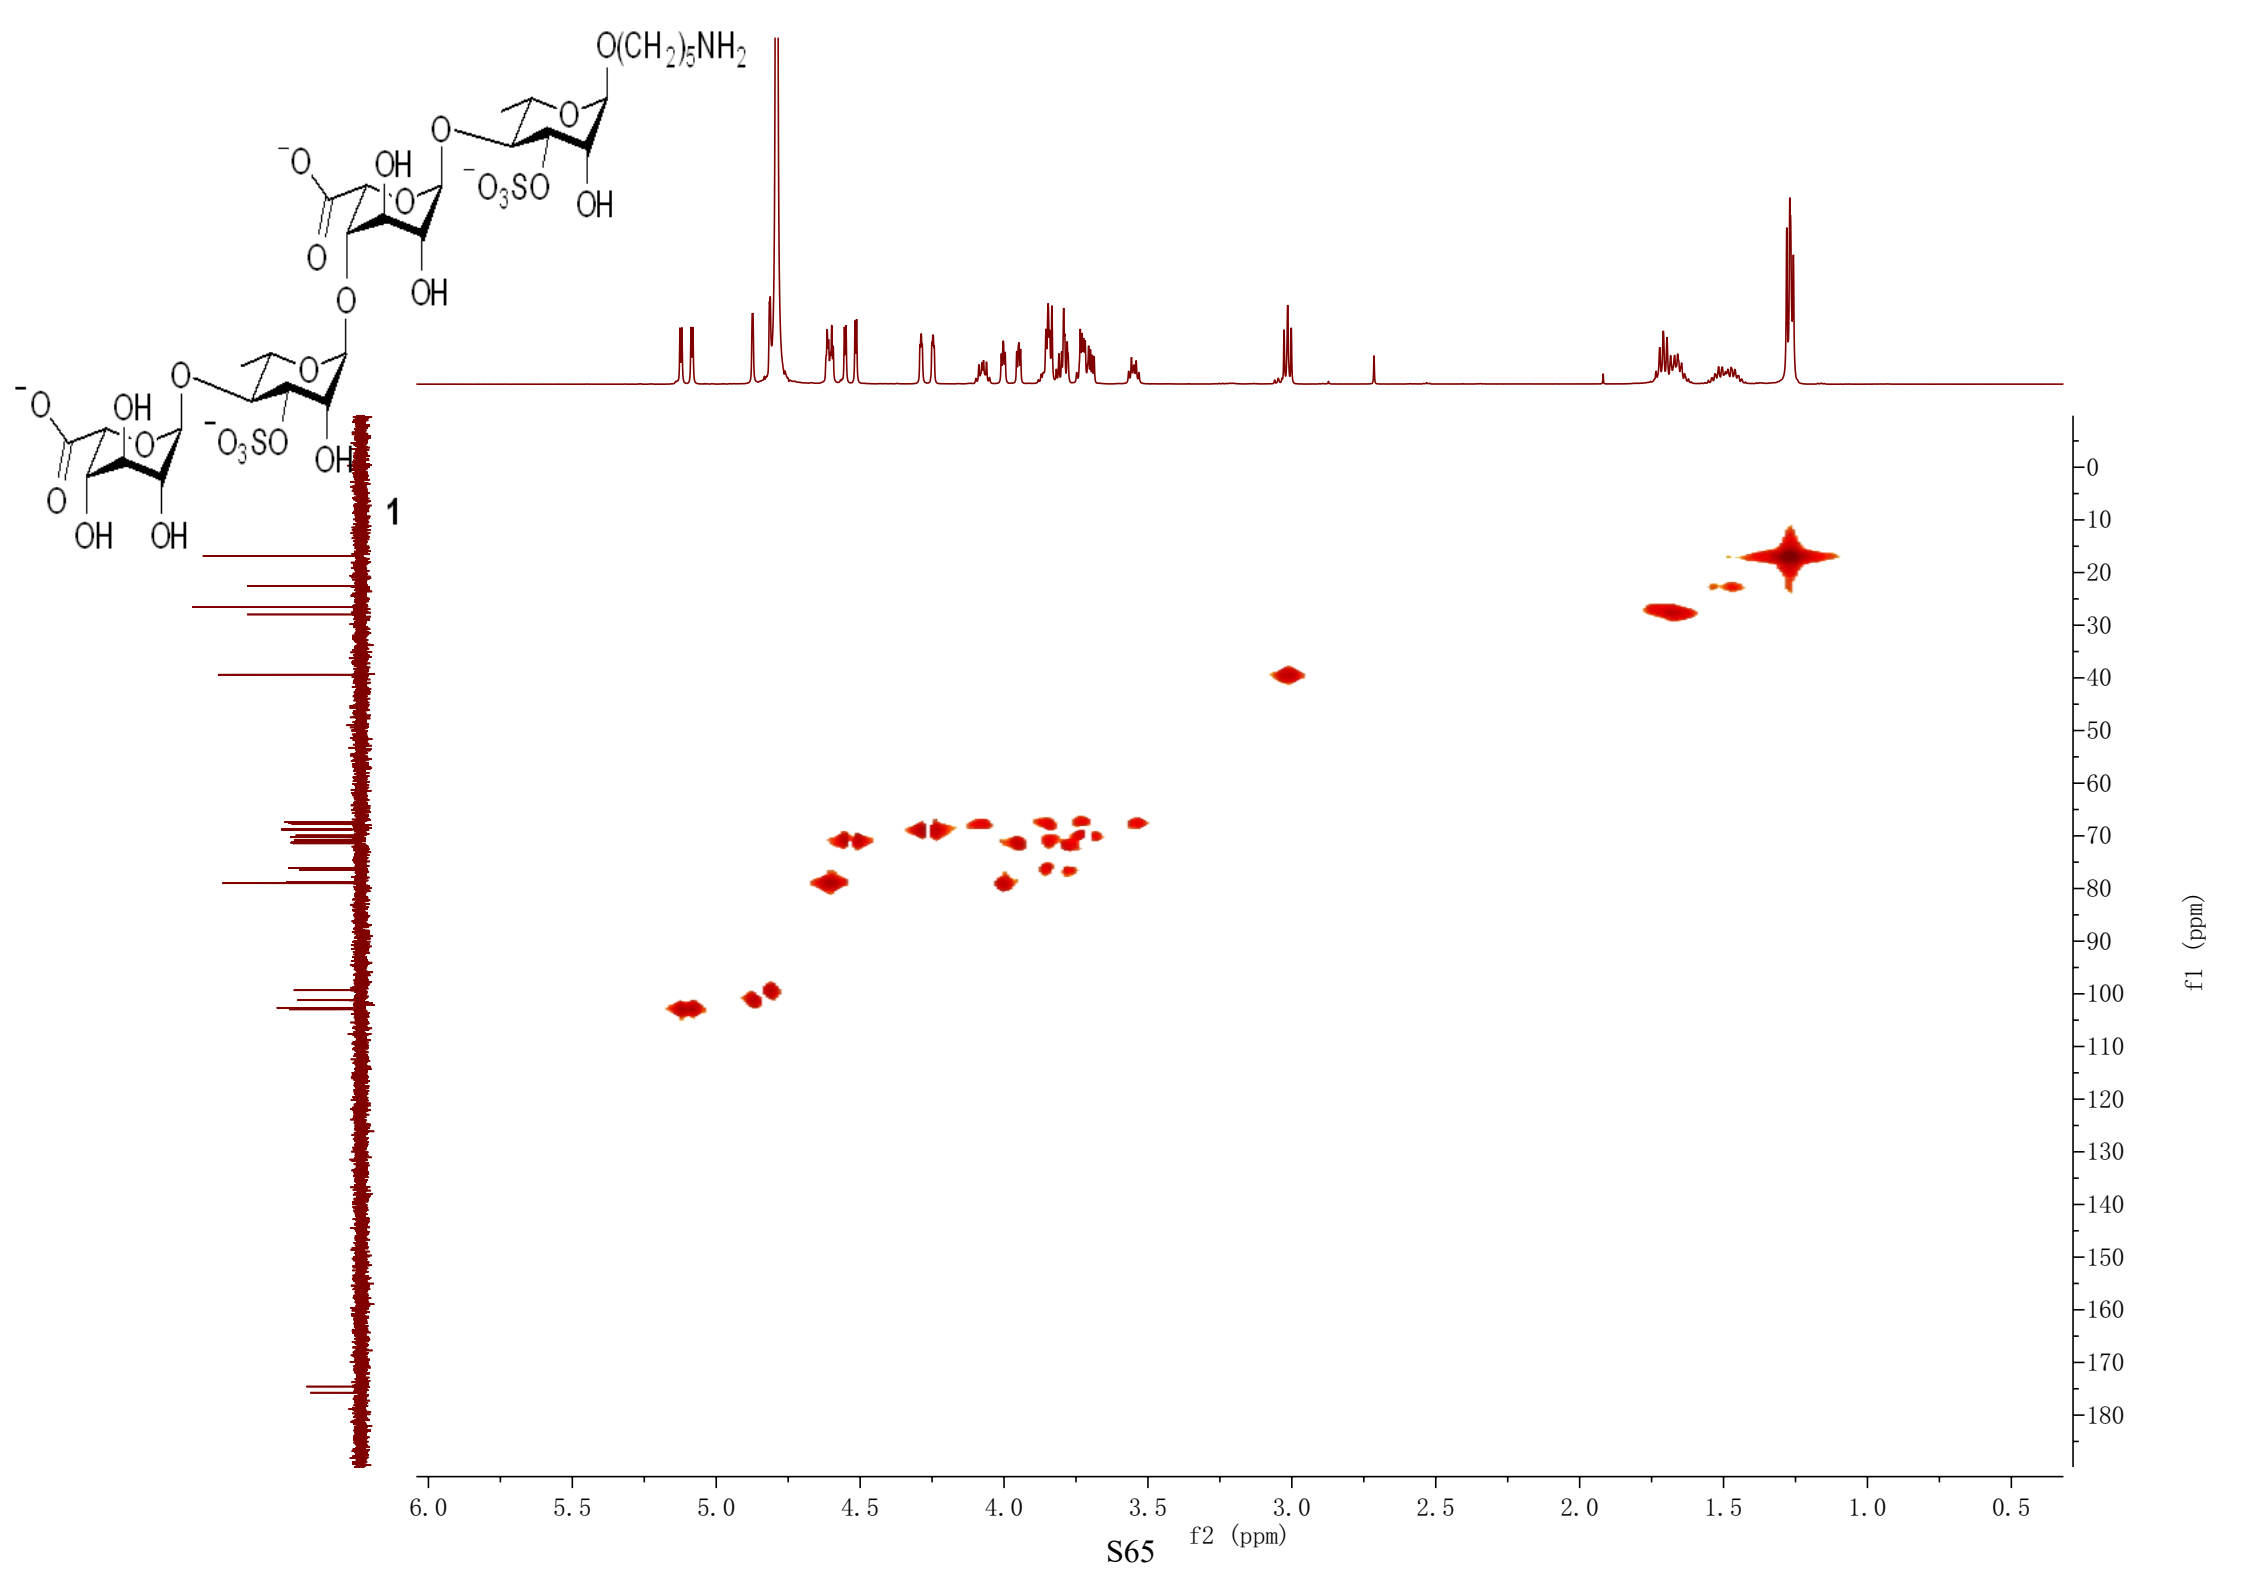

Supplement: d0ob01852j1.pdf [file d0ob01852j1.pdf]
